# Supplementary material for: Synthesis and biological evaluation of benzimidazoles/1,3,5-triazine-2,4-diamine hybrid compounds: a new class of multifunctional alzheimer targeting agents
Source: Royal Society of Chemistry journal article supplement (doi:10.1039/d2nj00371f), 2022-01-01
Supplement: d2nj00371f1.pdf [file d2nj00371f1.pdf]

**New Journal of Chemistry**

**Electronic Supporting Information**

**Synthesis and Biological Evaluation of Benzimidazoles/1,3,5-Triazine-2,4-diamine Hybrid Compounds: A New Class of Multifunction Alzheimer Targeting Agents**

Somaye Karimian <sup>a</sup>, Mohsen Shekouhy<sup>b</sup>, Somayeh Pirhadi<sup>c</sup>, Aida Irajid<sup>d,e</sup>, Mahshid Attarroshan<sup>c</sup>,

Najmeh Edraki<sup>\*, c</sup>, Mehdi Khoshneviszadeh<sup>\*, a, c</sup>

<sup>a</sup> Department of Medicinal Chemistry, School of pharmacy, Shiraz University of Medical Sciences, Shiraz, Iran

<sup>b</sup> Department of Chemistry, College of Sciences, Shiraz University, Shiraz 71454, Iran

<sup>c</sup> Medicinal and Natural Products Chemistry Research Center, Shiraz University of Medical sciences, Shiraz, Iran

<sup>d</sup> Stem Cells Technology Research Center, Shiraz University of Medical Sciences, Shiraz, Iran

<sup>e</sup> Central Research Laboratory, Shiraz University of Medical Sciences, Shiraz, Iran

| <b>Contents</b>                                                 | <b>Page No.</b> |
|-----------------------------------------------------------------|-----------------|
| Figure 1. $^1\text{H}$ -NMR spectrum of compound (3) .....      | 6               |
| Figure 2. $^{13}\text{C}$ -NMR spectrum of compound (3) .....   | 7               |
| Figure 3. MASS spectrum of compound (3) .....                   | 8               |
| Figure 4. $^1\text{H}$ -NMR spectrum of compound (5a) .....     | 9               |
| Figure 5. $^{13}\text{C}$ -NMR spectrum of compound (5a) .....  | 10              |
| Figure 6. MASS spectrum of compound (5a) .....                  | 11              |
| Figure 7. $^1\text{H}$ -NMR spectrum of compound (5b) .....     | 12              |
| Figure 8. $^{13}\text{C}$ -NMR spectrum of compound (5b) .....  | 13              |
| Figure 9. MASS spectrum of compound (5b) .....                  | 14              |
| Figure 10. $^1\text{H}$ -NMR spectrum of compound (5c) .....    | 15              |
| Figure 11. $^{13}\text{C}$ -NMR spectrum of compound (5c) ..... | 16              |
| Figure 12. MASS spectrum of compound (5c) .....                 | 17              |
| Figure 13. $^1\text{H}$ -NMR spectrum of compound (7a) .....    | 18              |
| Figure 14. $^{13}\text{C}$ -NMR spectrum of compound (7a) ..... | 19              |
| Figure 15. $^1\text{H}$ -NMR spectrum of compound (7b) .....    | 20              |
| Figure 16. $^{13}\text{C}$ -NMR spectrum of compound (7b) ..... | 21              |
| Figure 17. MASS spectrum of compound (7b) .....                 | 22              |
| Figure 18. $^1\text{H}$ -NMR spectrum of compound (7c) .....    | 23              |
| Figure 19. $^{13}\text{C}$ -NMR spectrum of compound (7c) ..... | 24              |
| Figure 20. $^1\text{H}$ -NMR spectrum of compound (7d) .....    | 25              |
| Figure 21. $^{13}\text{C}$ -NMR spectrum of compound (7d) ..... | 26              |
| Figure 22. MASS spectrum of compound (7d) .....                 | 27              |
| Figure 23. $^1\text{H}$ -NMR spectrum of compound (7e) .....    | 28              |
| Figure 24. $^{13}\text{C}$ -NMR spectrum of compound (7e) ..... | 29              |
| Figure 25. MASS spectrum of compound (7e) .....                 | 30              |
| Figure 26. $^1\text{H}$ -NMR spectrum of compound (7f) .....    | 31              |
| Figure 27. $^{13}\text{C}$ -NMR spectrum of compound (7f) ..... | 32              |

|                                                                 |    |
|-----------------------------------------------------------------|----|
| Figure 28. $^1\text{H}$ -NMR spectrum of compound (7g) .....    | 33 |
| Figure 29. $^{13}\text{C}$ -NMR spectrum of compound (7g) ..... | 34 |
| Figure 30. $^1\text{H}$ -NMR spectrum of compound (7h) .....    | 35 |
| Figure 31. $^{13}\text{C}$ -NMR spectrum of compound (7h) ..... | 36 |
| Figure 32. MASS spectrum of compound (7h) .....                 | 37 |
| Figure 33. $^1\text{H}$ -NMR spectrum of compound (7i) .....    | 38 |
| Figure 34. $^{13}\text{C}$ -NMR spectrum of compound (7i) ..... | 39 |
| Figure 35. MASS spectrum of compound (7i) .....                 | 40 |
| Figure 36. $^1\text{H}$ -NMR spectrum of compound (7j) .....    | 41 |
| Figure 37. $^{13}\text{C}$ -NMR spectrum of compound (7j) ..... | 42 |
| Figure 38. MASS spectrum of compound (7j) .....                 | 43 |
| Figure 39. $^1\text{H}$ -NMR spectrum of compound (7k) .....    | 44 |
| Figure 40. $^{13}\text{C}$ -NMR spectrum of compound (7k) ..... | 45 |
| Figure 41. MASS spectrum of compound (7k) .....                 | 46 |
| Figure 42. $^1\text{H}$ -NMR spectrum of compound (7l) .....    | 47 |
| Figure 43. $^{13}\text{C}$ -NMR spectrum of compound (7l) ..... | 48 |
| Figure 44. MASS spectrum of compound (7l) .....                 | 49 |
| Figure 45. $^1\text{H}$ -NMR spectrum of compound (9a) .....    | 50 |
| Figure 46. $^{13}\text{C}$ -NMR spectrum of compound (9a) ..... | 51 |
| Figure 47. MASS spectrum of compound (9a) .....                 | 52 |
| Figure 48. IR spectrum of compound (9a) .....                   | 53 |
| Figure 49. $^1\text{H}$ -NMR spectrum of compound (9b) .....    | 54 |
| Figure 50. $^{13}\text{C}$ -NMR spectrum of compound (9b) ..... | 55 |
| Figure 51. MASS spectrum of compound (9b) .....                 | 56 |
| Figure 52. IR spectrum of compound (9b) .....                   | 57 |
| Figure 53. $^1\text{H}$ -NMR spectrum of compound (9c) .....    | 58 |
| Figure 54. $^{13}\text{C}$ -NMR spectrum of compound (9c) ..... | 59 |
| Figure 55. MASS spectrum of compound (9c) .....                 | 60 |

|                                                                |    |
|----------------------------------------------------------------|----|
| Figure 56. IR spectrum of compound (9c) .....                  | 61 |
| Figure 57. <sup>1</sup> H-NMR spectrum of compound (9d) .....  | 62 |
| Figure 58. <sup>13</sup> C-NMR spectrum of compound (9d) ..... | 63 |
| Figure 59. MASS spectrum of compound (9d) .....                | 64 |
| Figure 60. IR spectrum of compound (9d) .....                  | 65 |
| Figure 61. <sup>1</sup> H-NMR spectrum of compound (9e) .....  | 66 |
| Figure 62. <sup>13</sup> C-NMR spectrum of compound (9e) ..... | 67 |
| Figure 63. MASS spectrum of compound (9e) .....                | 68 |
| Figure 64. IR spectrum of compound (9e) .....                  | 69 |
| Figure 65. <sup>1</sup> H-NMR spectrum of compound (9f) .....  | 70 |
| Figure 66. <sup>13</sup> C-NMR spectrum of compound (9f) ..... | 71 |
| Figure 67. MASS spectrum of compound (9f) .....                | 72 |
| Figure 68. IR spectrum of compound (9f) .....                  | 73 |
| Figure 69. <sup>1</sup> H-NMR spectrum of compound (9g) .....  | 74 |
| Figure 70. <sup>13</sup> C-NMR spectrum of compound (9g) ..... | 75 |
| Figure 71. MASS spectrum of compound (9g) .....                | 76 |
| Figure 72. IR spectrum of compound (9g) .....                  | 77 |
| Figure 73. <sup>1</sup> H-NMR spectrum of compound (9h) .....  | 78 |
| Figure 74. <sup>13</sup> C-NMR spectrum of compound (9h) ..... | 79 |
| Figure 75. MASS spectrum of compound (9h) .....                | 80 |
| Figure 76. IR spectrum of compound (9h) .....                  | 81 |
| Figure 77. <sup>1</sup> H-NMR spectrum of compound (9i) .....  | 82 |
| Figure 78. <sup>13</sup> C-NMR spectrum of compound (9i) ..... | 83 |
| Figure 79. MASS spectrum of compound (9i) .....                | 84 |
| Figure 80. IR spectrum of compound (9i) .....                  | 85 |
| Figure 81. <sup>1</sup> H-NMR spectrum of compound (9j) .....  | 86 |
| Figure 82. <sup>13</sup> C-NMR spectrum of compound (9j) ..... | 87 |
| Figure 83. MASS spectrum of compound (9j) .....                | 88 |

|                                                                                               |     |
|-----------------------------------------------------------------------------------------------|-----|
| Figure 84. IR spectrum of compound (9j) .....                                                 | 89  |
| Figure 85. <sup>1</sup> H-NMR spectrum of compound (9k) .....                                 | 90  |
| Figure 86. <sup>13</sup> C-NMR spectrum of compound (9k) .....                                | 91  |
| Figure 87. MASS spectrum of compound (9k) .....                                               | 92  |
| Figure 88. IR spectrum of compound (9k) .....                                                 | 93  |
| Figure 89. <sup>1</sup> H-NMR spectrum of compound (9l) .....                                 | 94  |
| Figure 90. <sup>13</sup> C-NMR spectrum of compound (9l) .....                                | 95  |
| Figure 91. MASS spectrum of compound (9l) .....                                               | 96  |
| Figure 92. IR spectrum of compound (9l) .....                                                 | 97  |
| Figure 93. HRMS spectrum of compound (9i) .....                                               | 98  |
| Table 1S. The predicted binding affinity of the selected ligands with the desired enzyme..... | 99  |
| Table 2S. Physicochemical properties and in silico ADME of the synthesized compounds.....     | 100 |

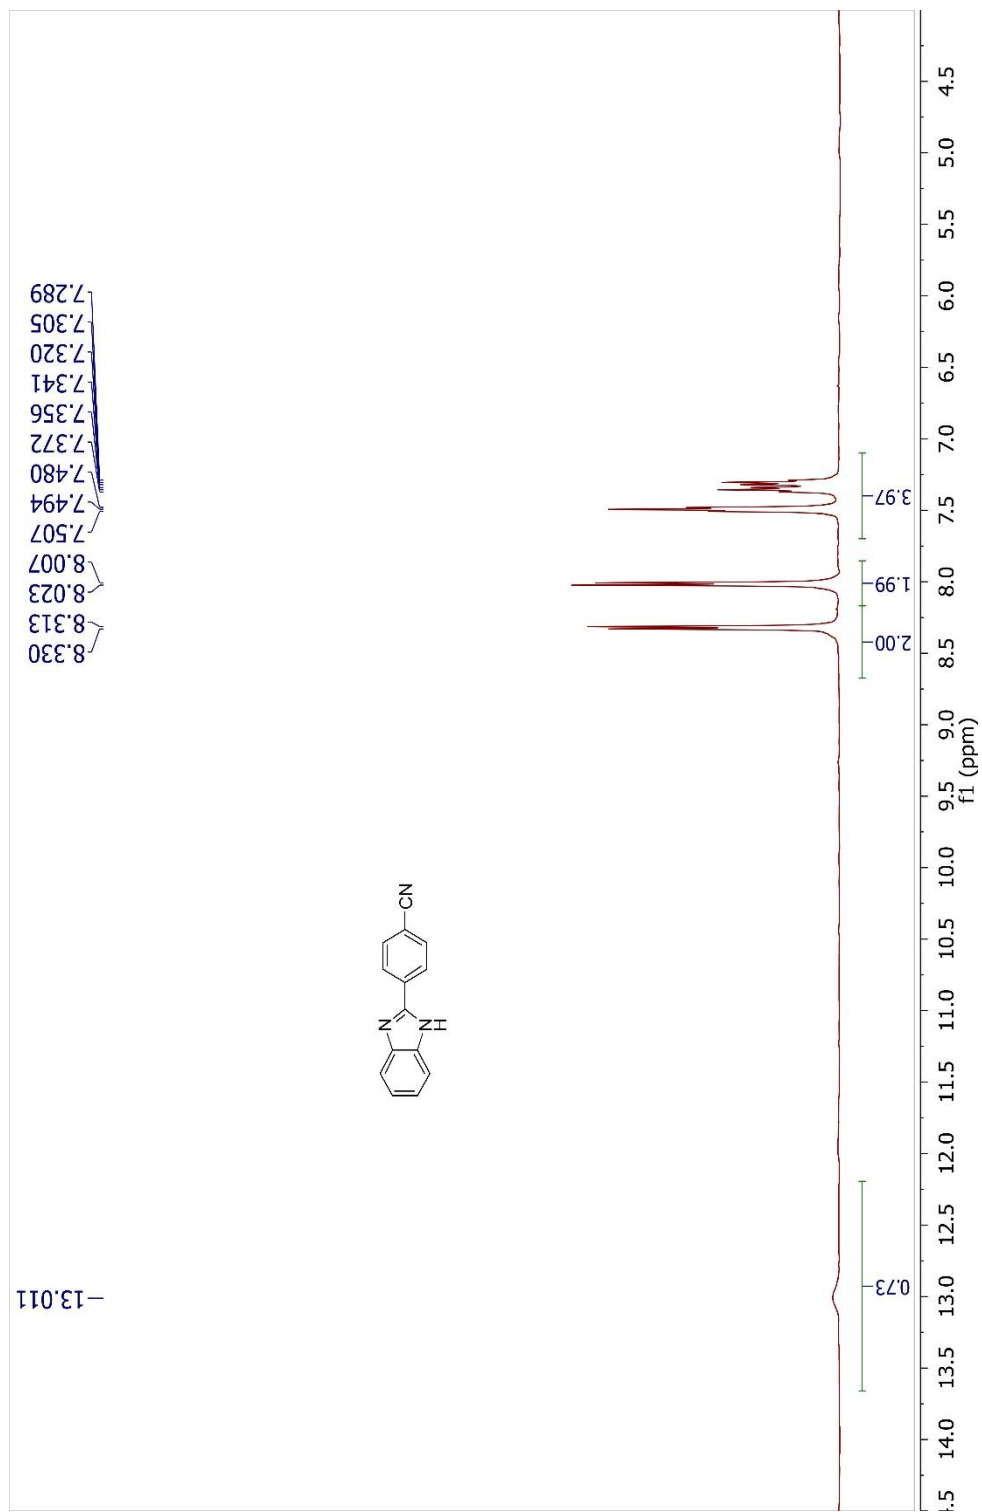

Figure 1. <sup>1</sup>H-NMR spectrum of compound (3)

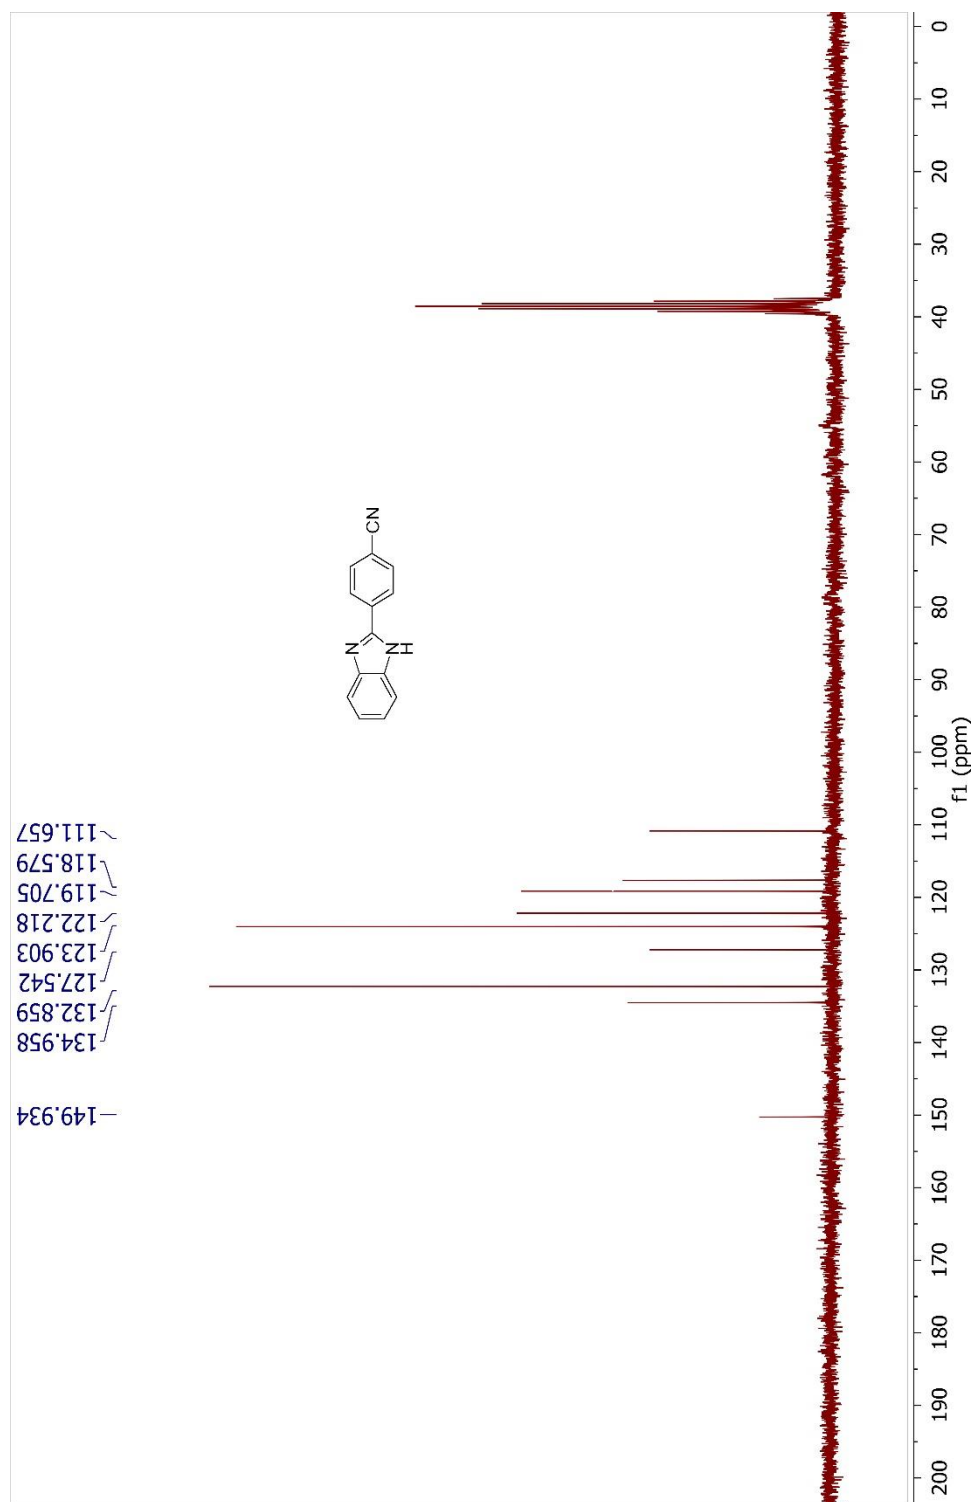

Figure 2.  $^{13}\text{C}$ -NMR spectrum of compound (3)

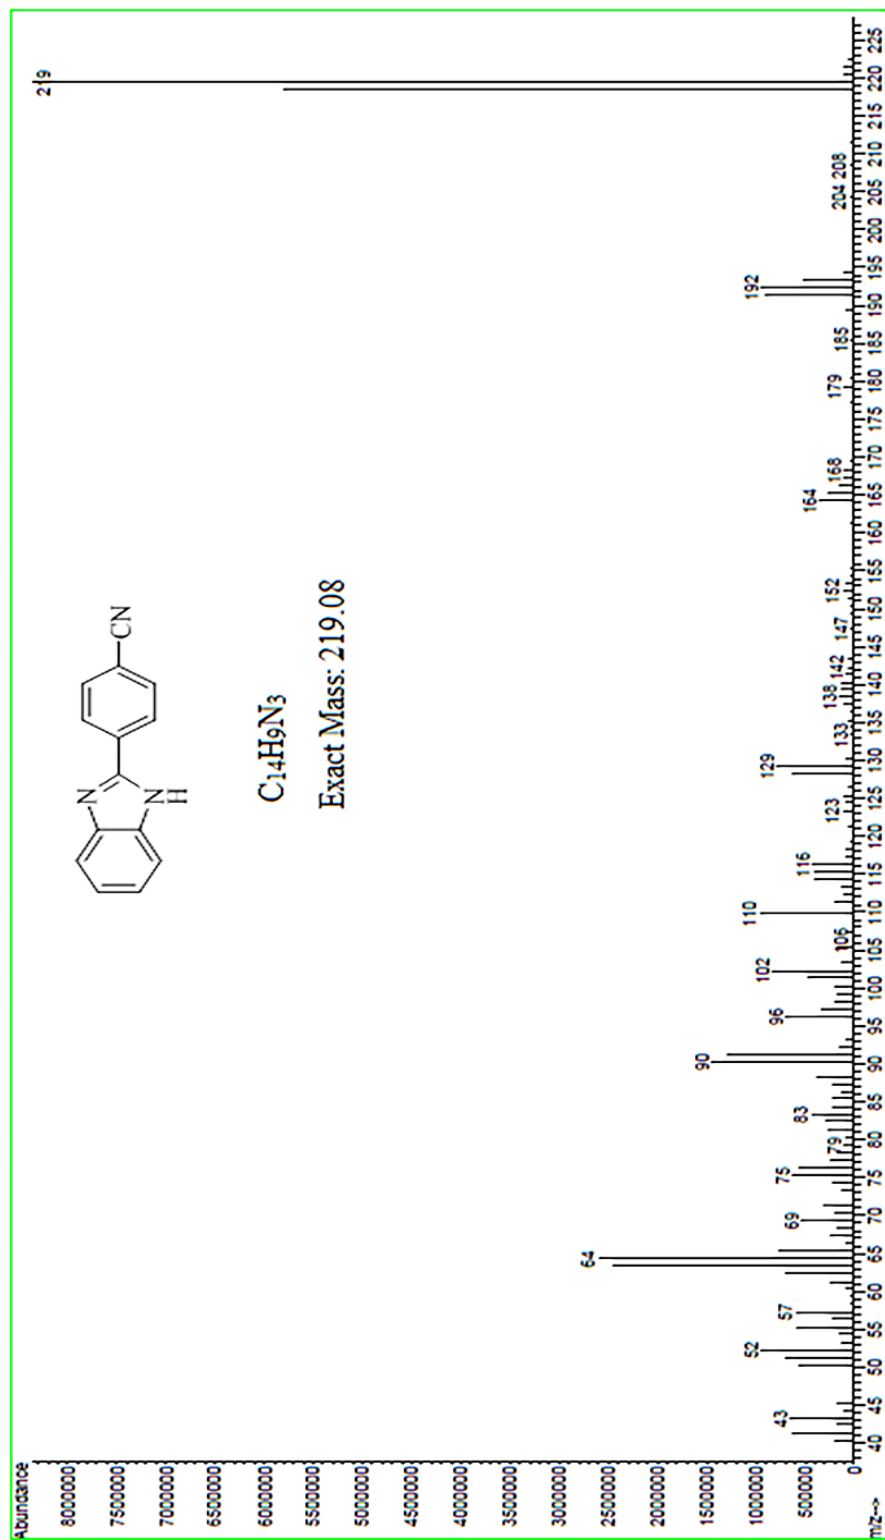

Figure 3. MASS spectrum of compound (3)



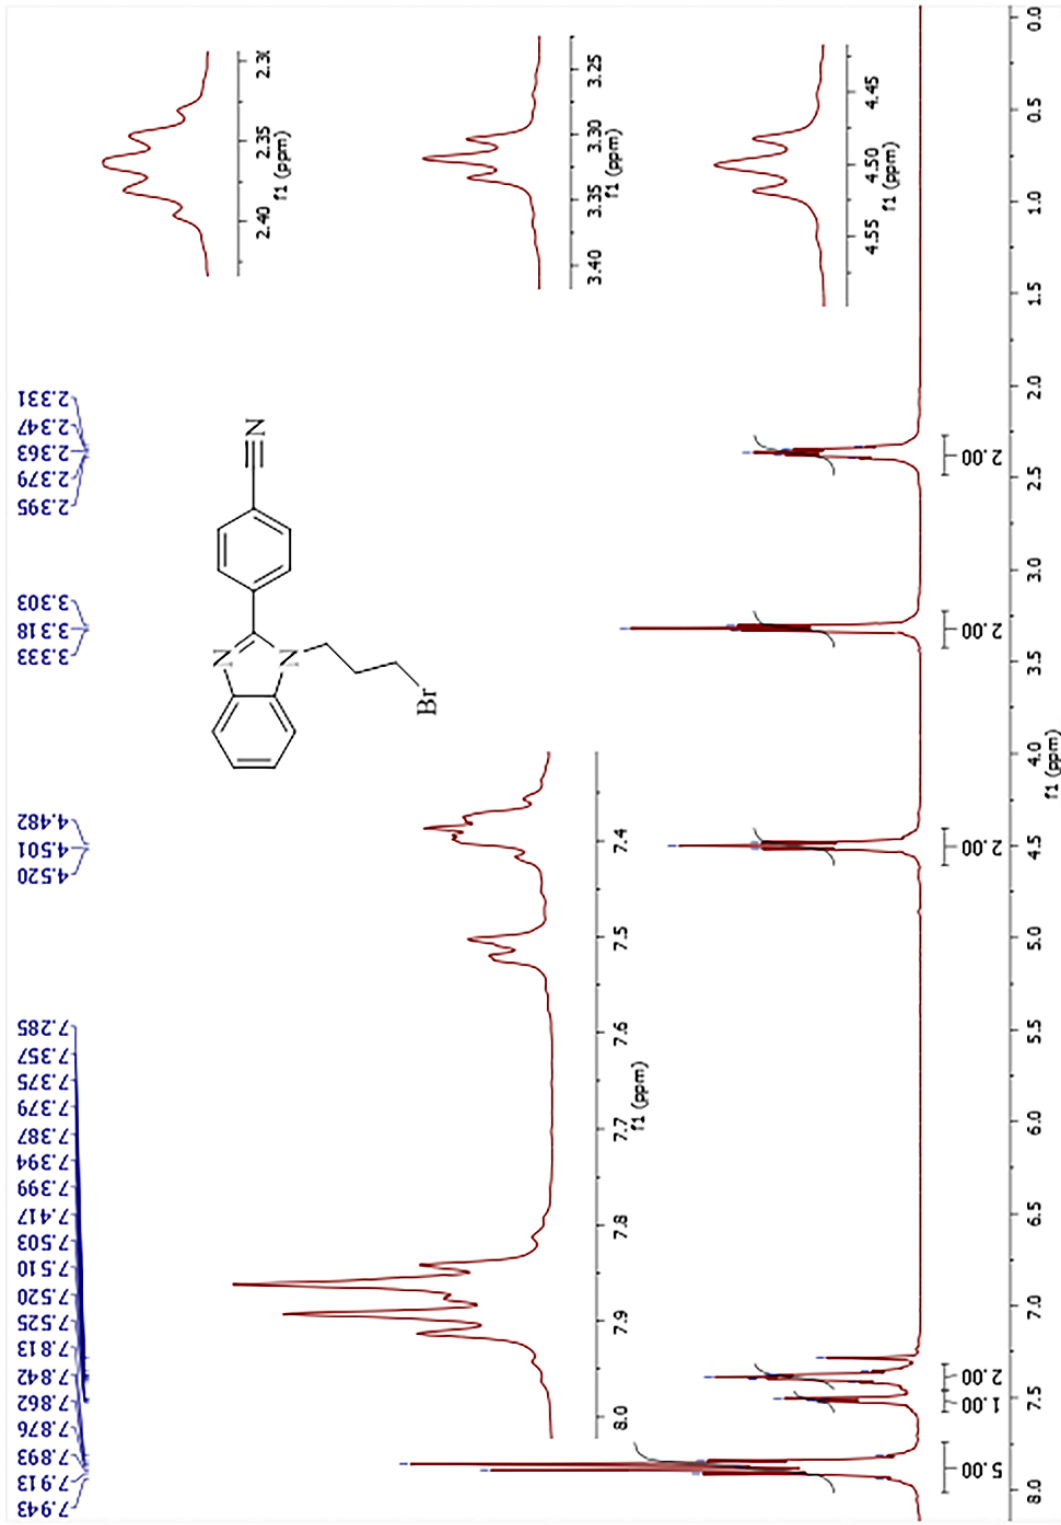

Figure 4. <sup>1</sup>H-NMR spectrum of compound (5a)

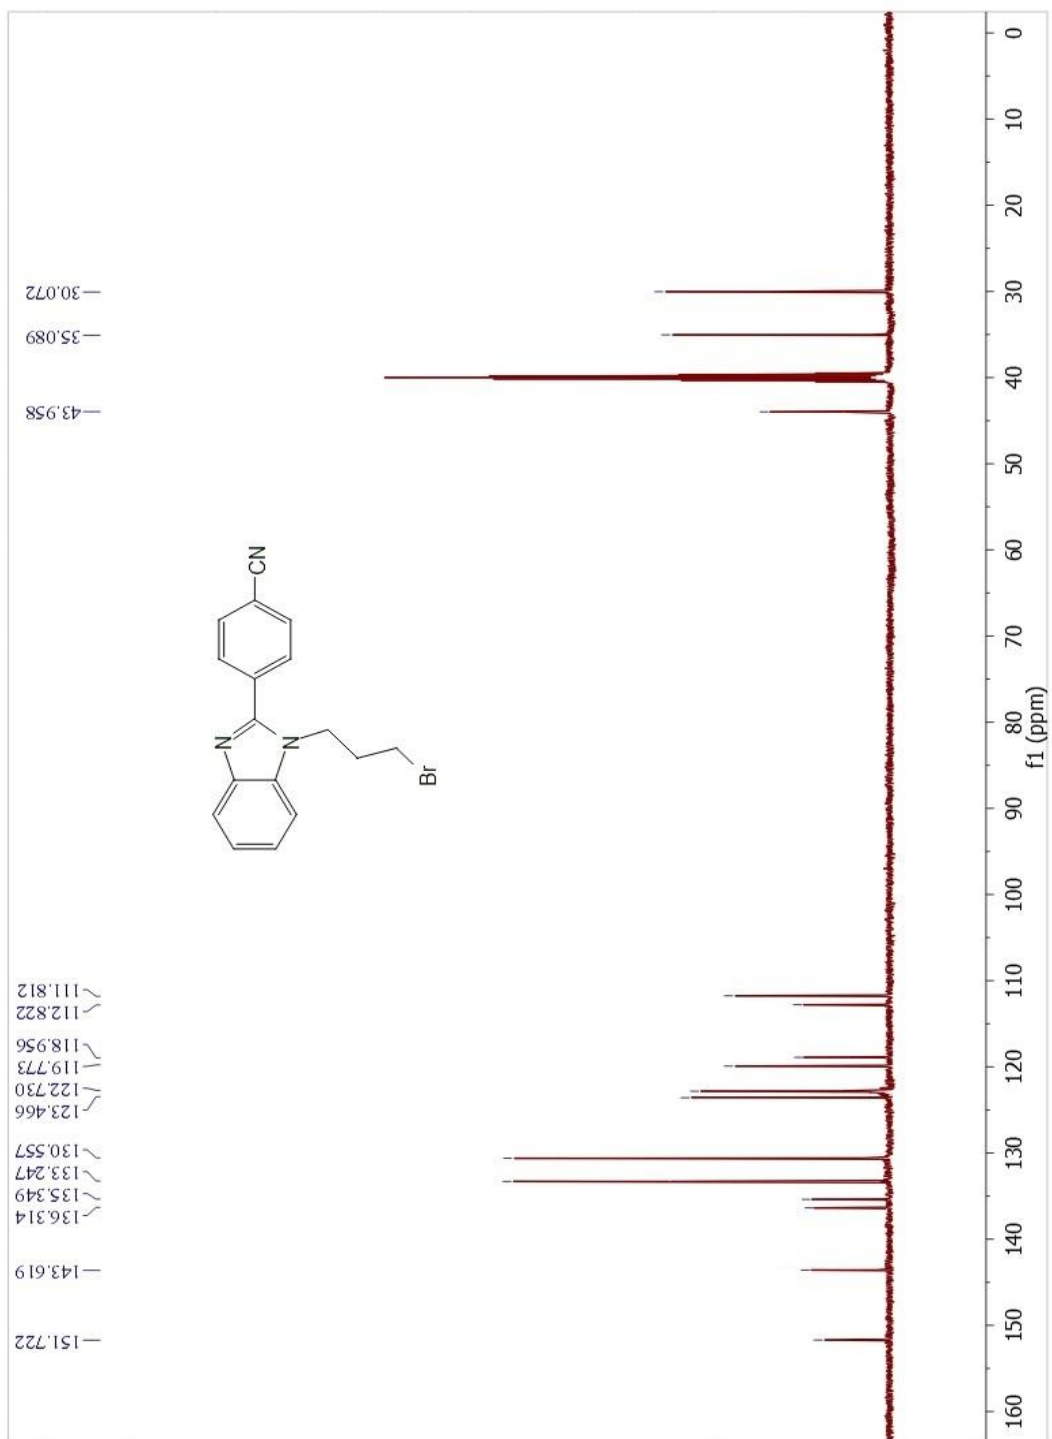

Figure 5.  $^{13}\text{C}$ -NMR spectrum of compound (5a)

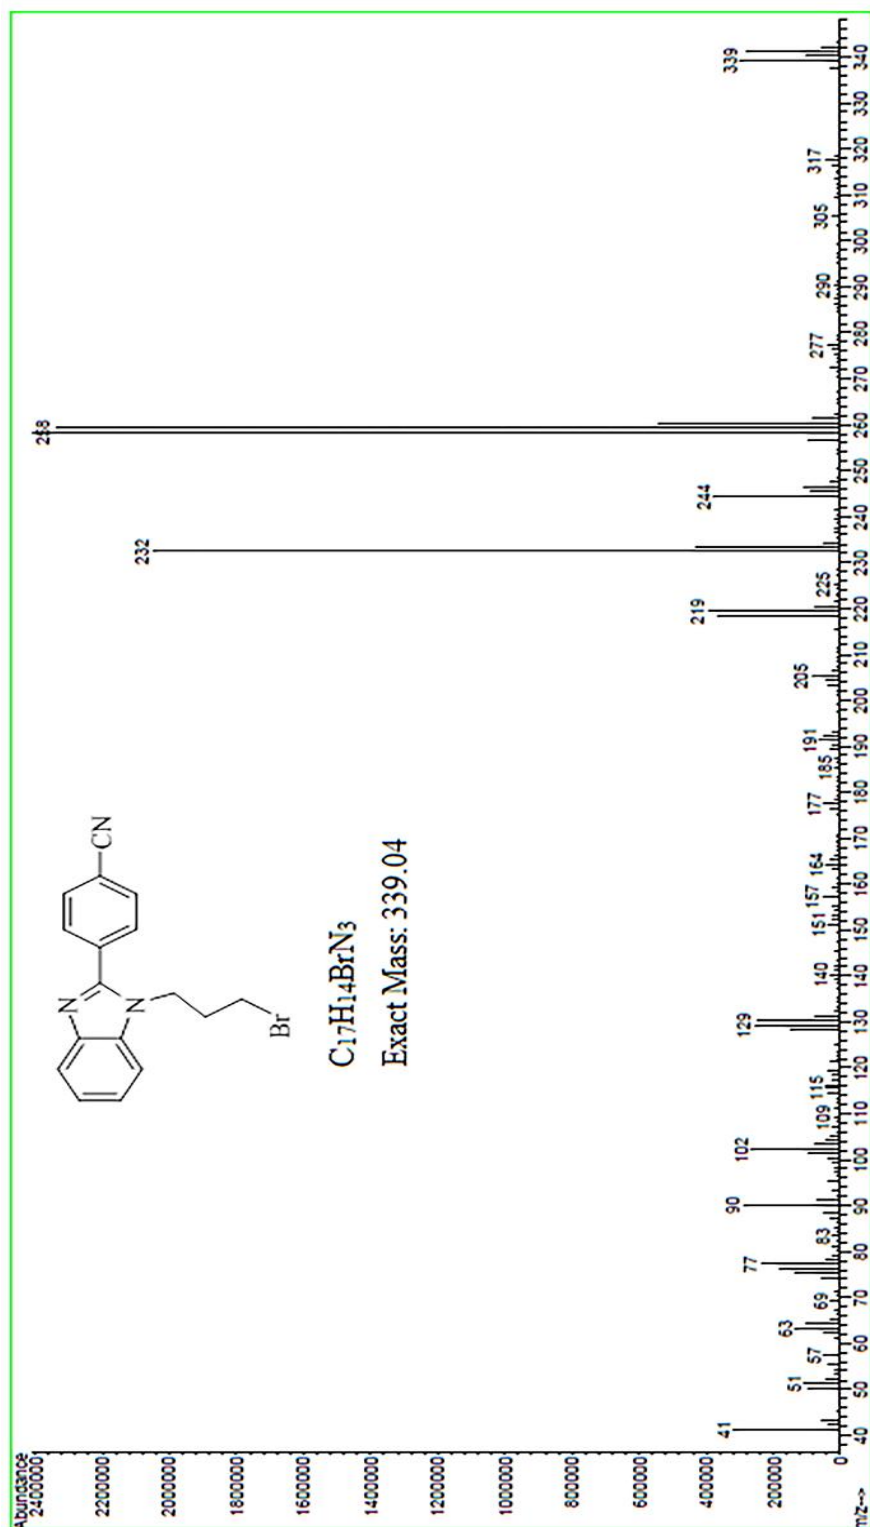

Figure 6. MASS spectrum of compound (5a)

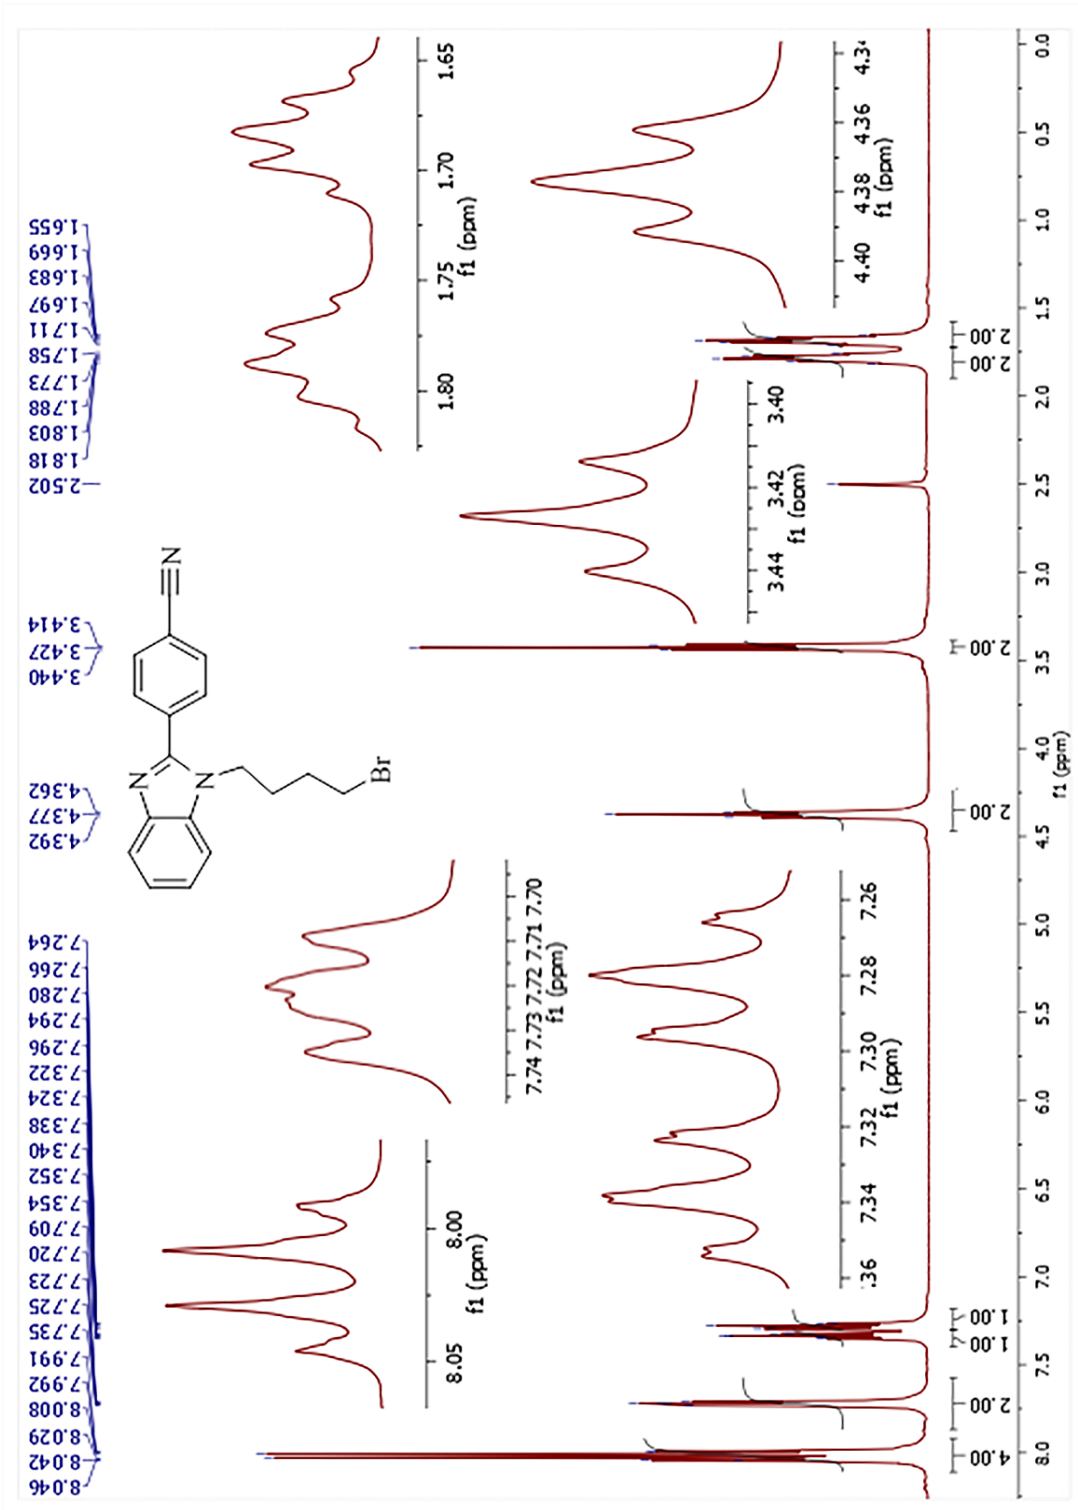

Figure 7. <sup>1</sup>H-NMR spectrum of compound (5b)

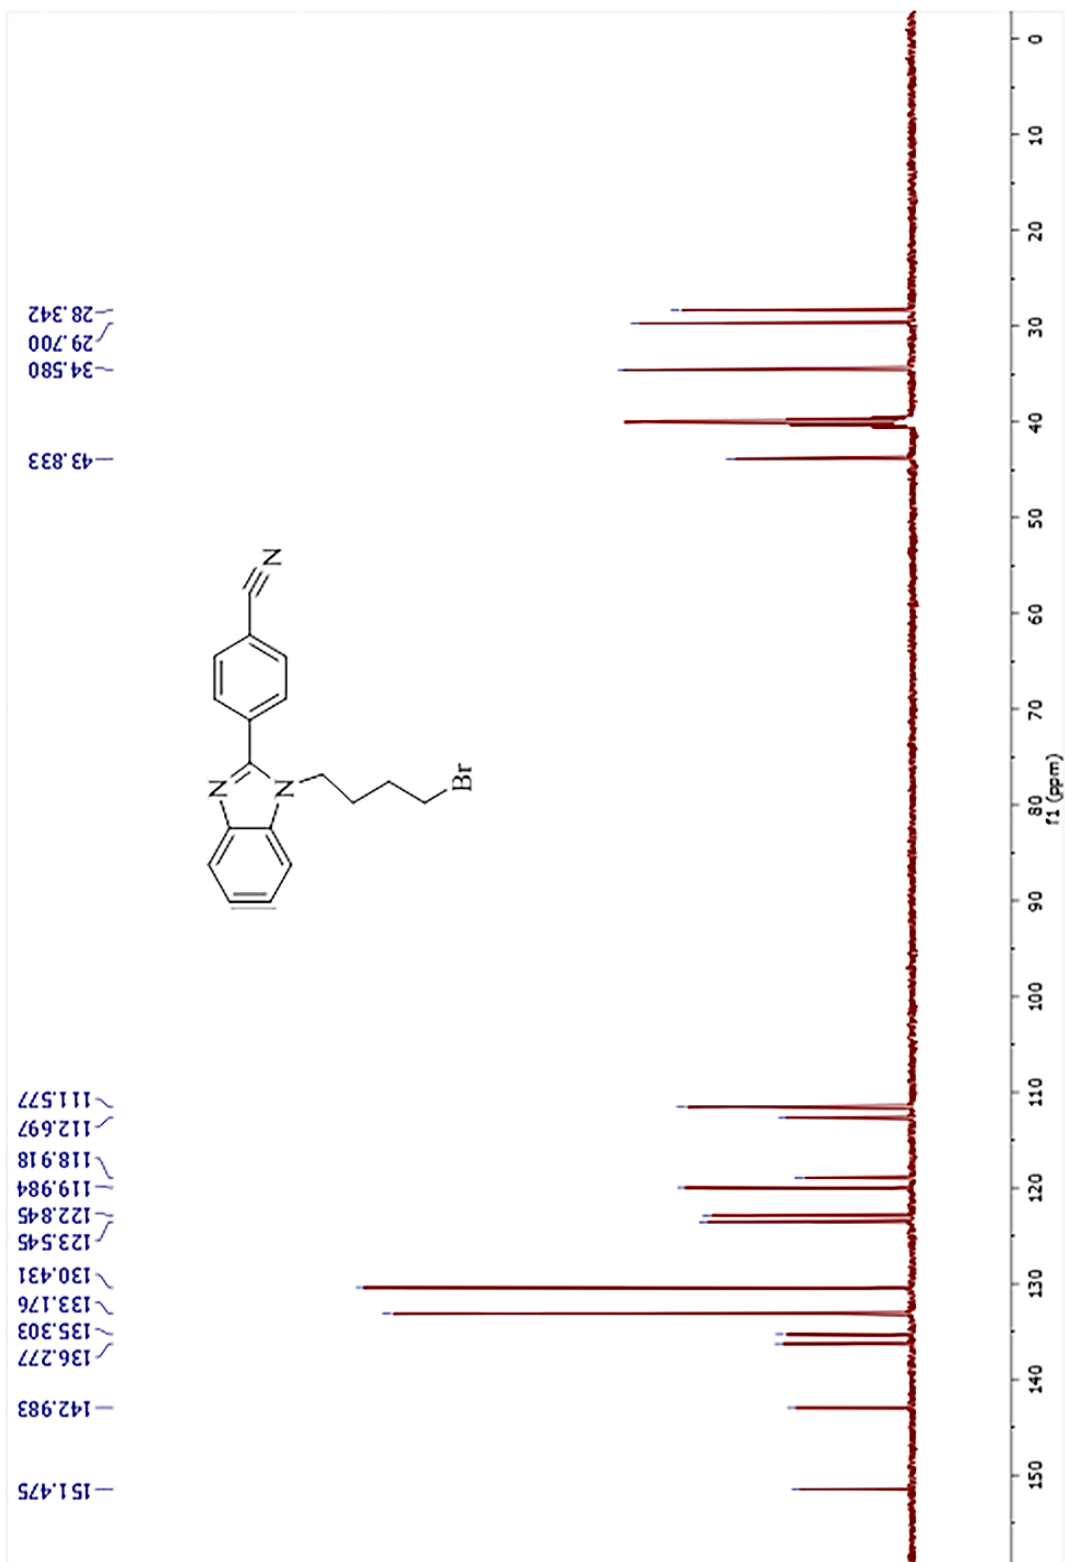

Figure 8.  $^{13}\text{C}$ -NMR spectrum of compound (5b)

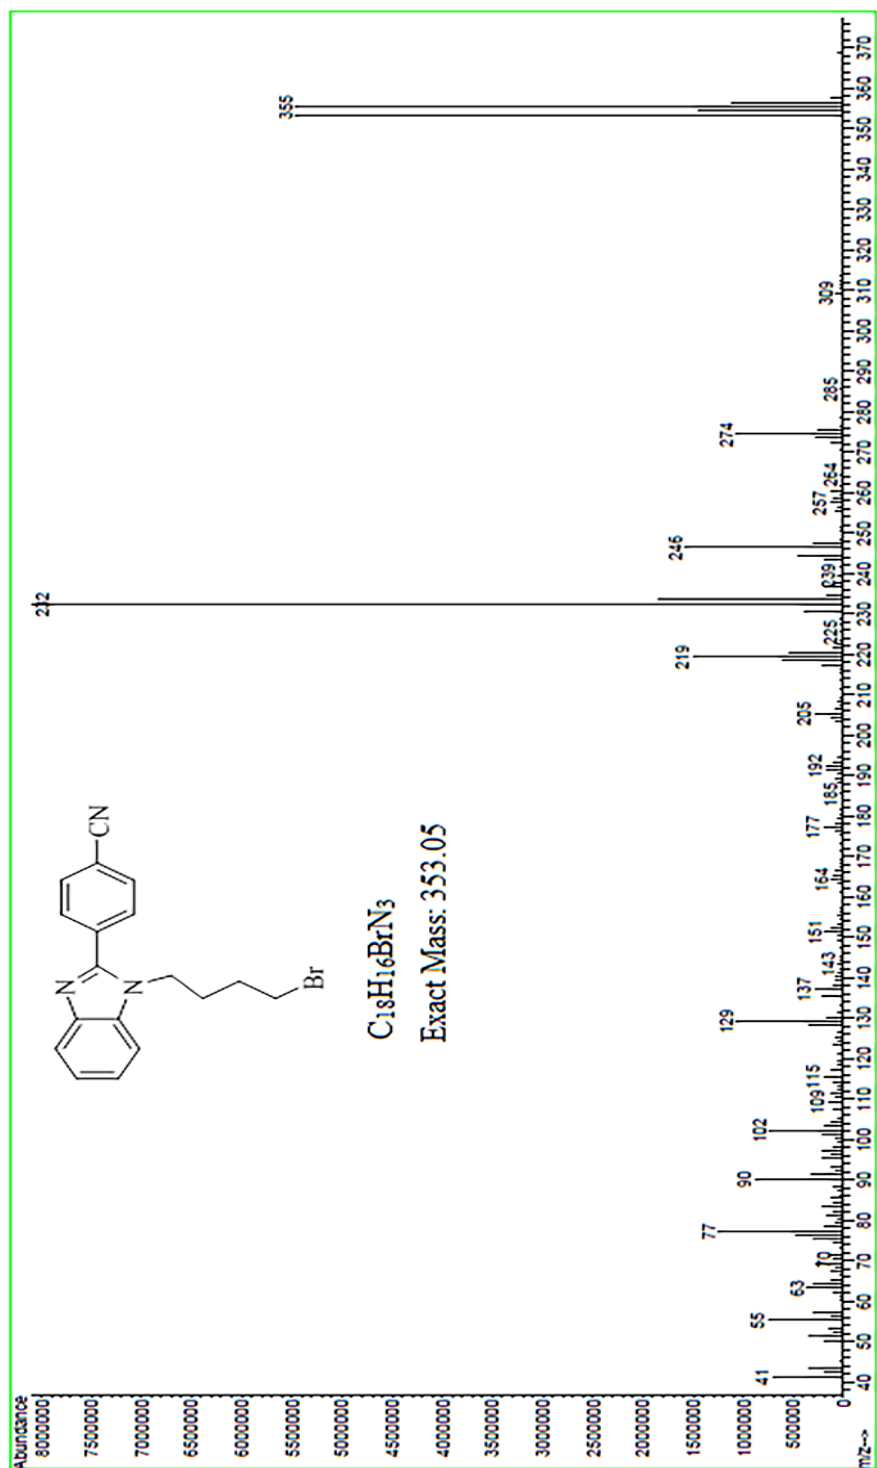

Figure 9. MASS spectrum of compound (5b)

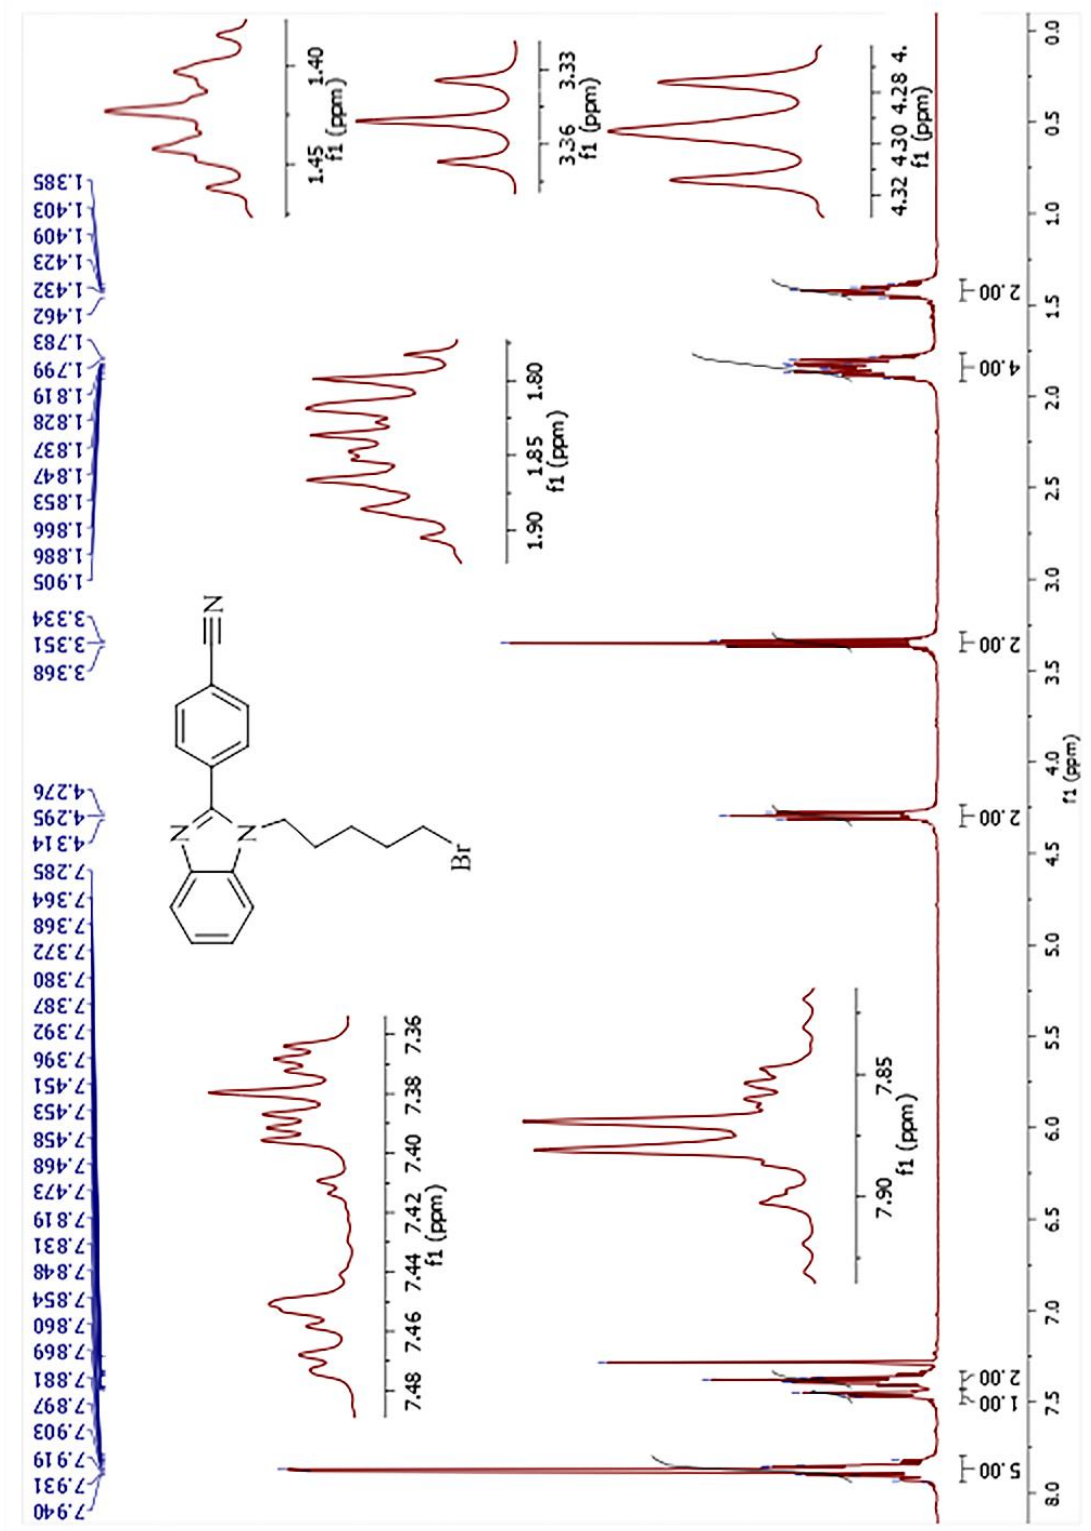

Figure 10. <sup>1</sup>H-NMR spectrum of compound (5c)

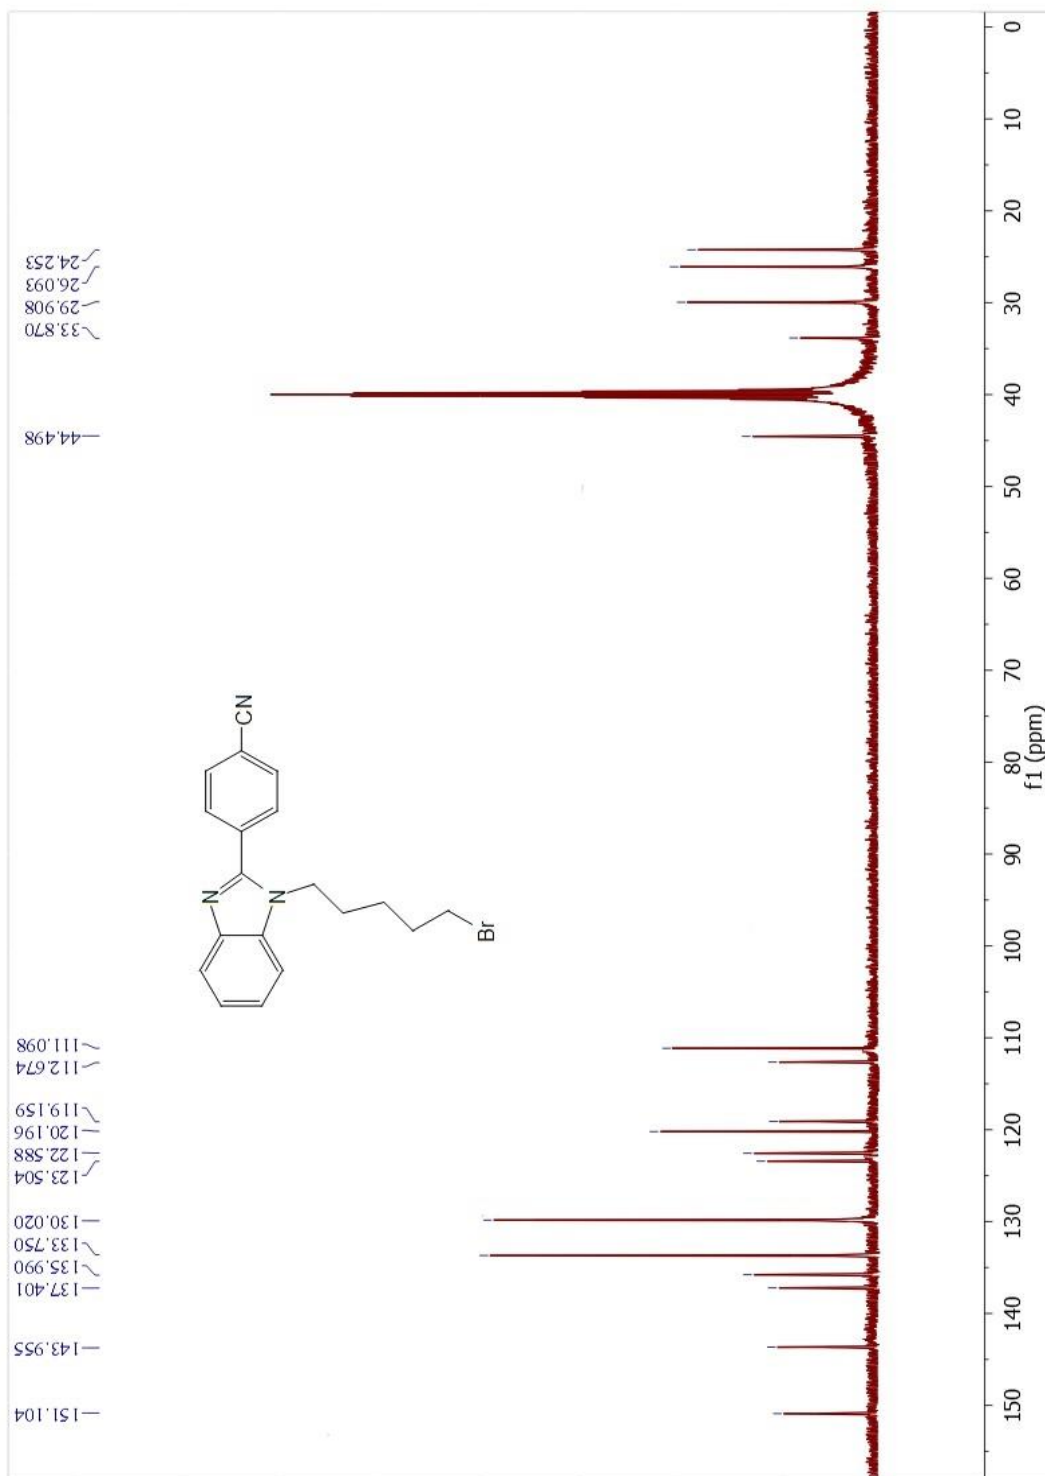

Figure 11.  $^{13}\text{C}$ -NMR spectrum of compound (5c)



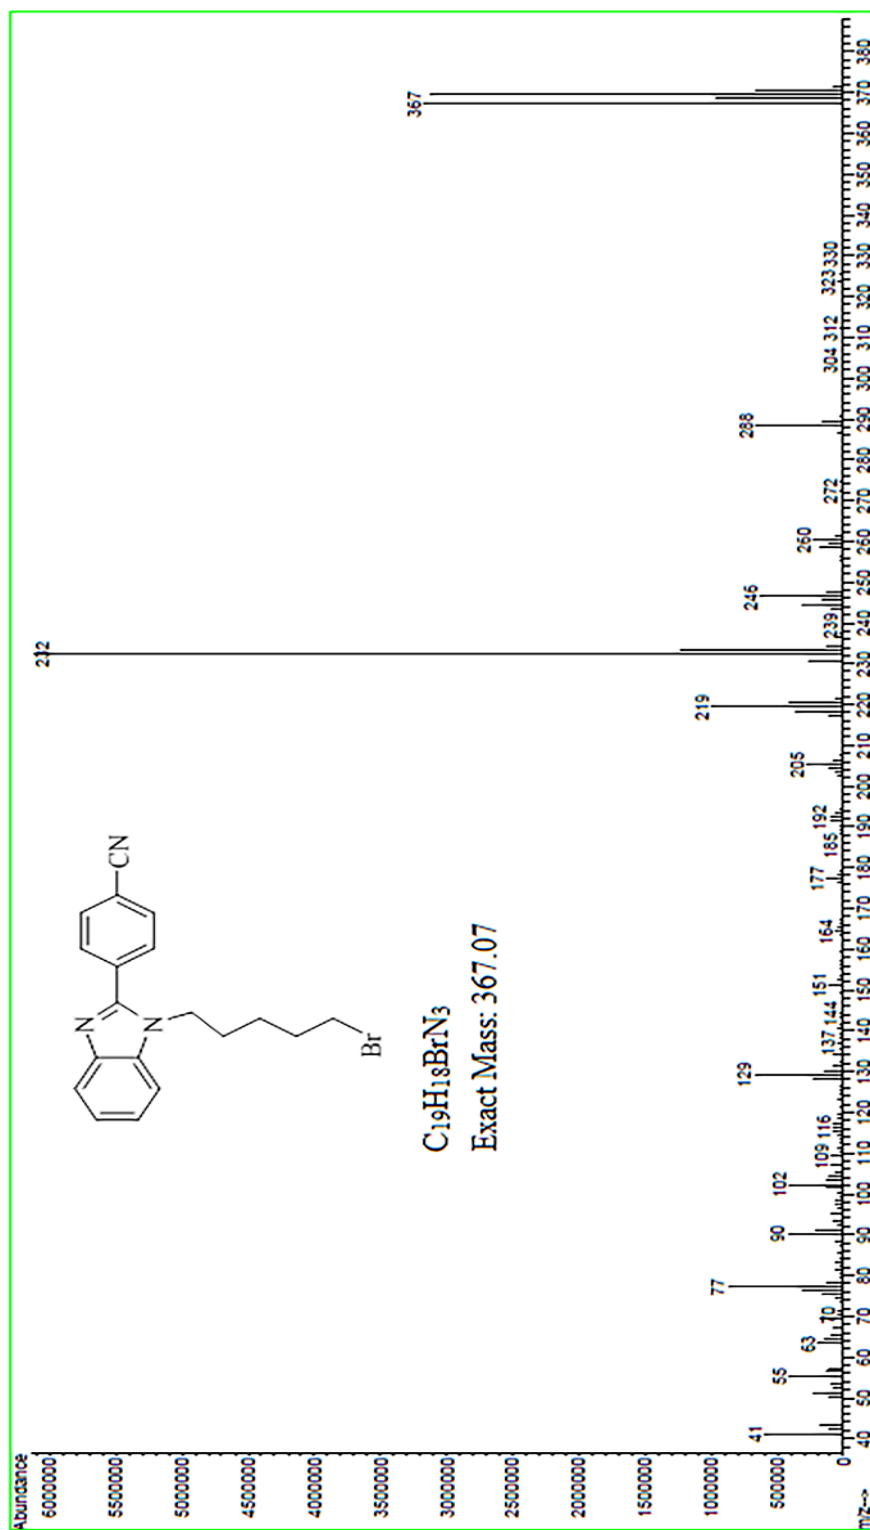

Figure 12.  
MASS spectrum of compound (5c)

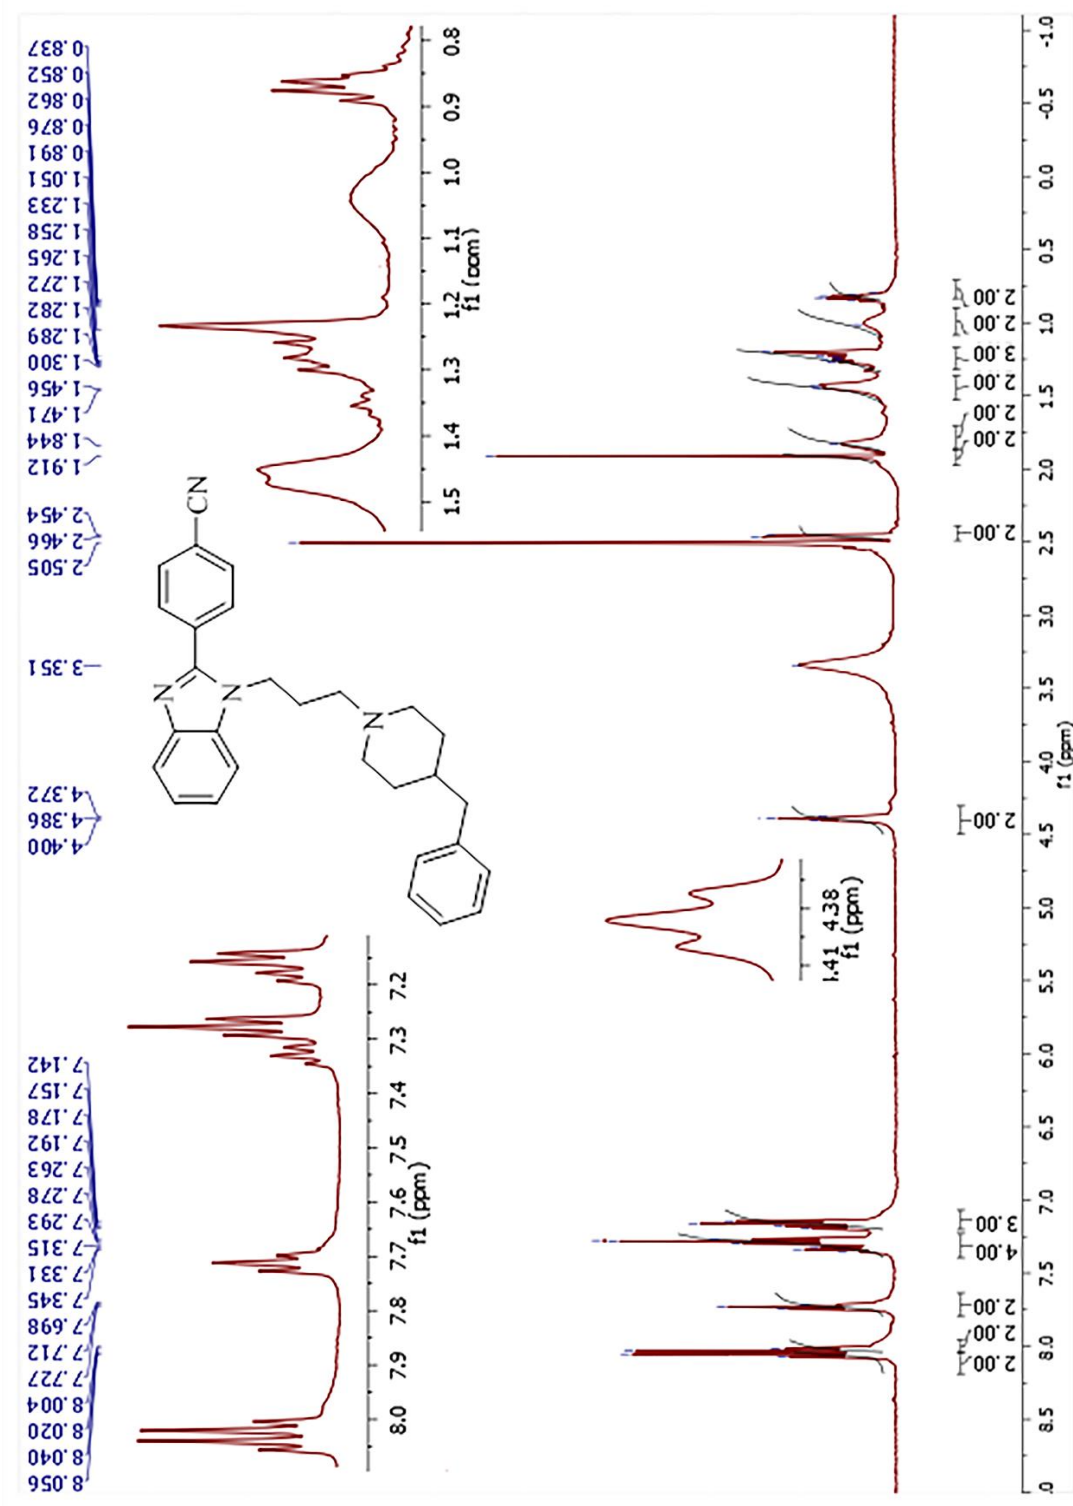

Figure 13.  $^1\text{H-NMR}$  spectrum of compound (7a)

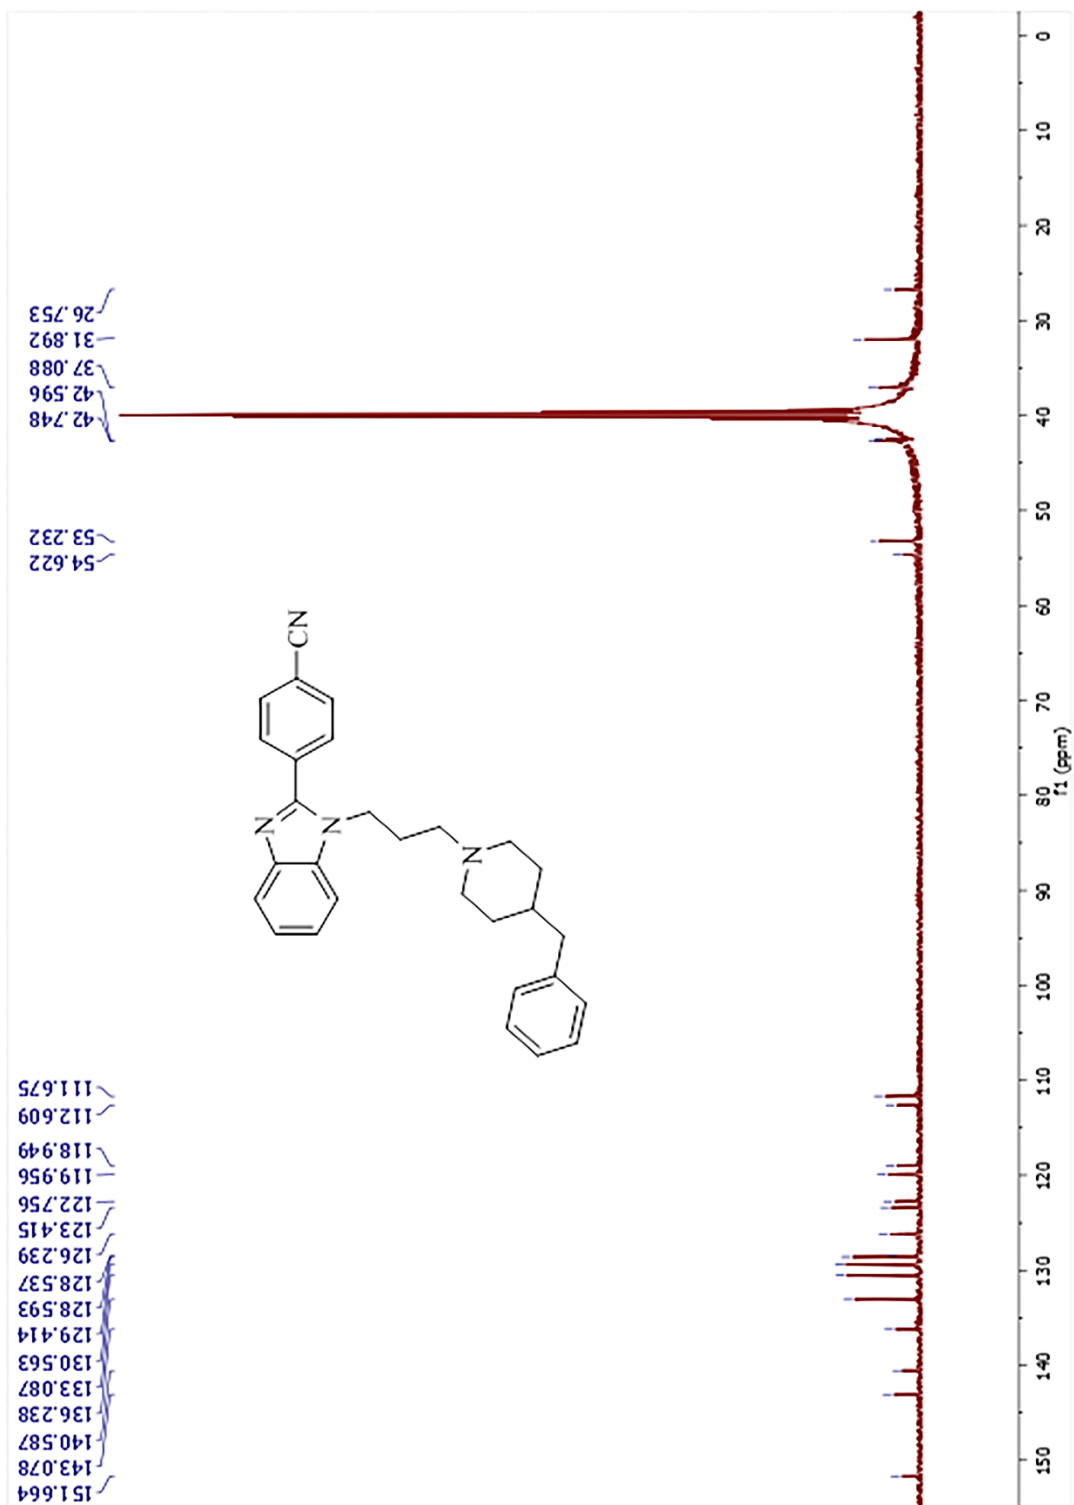

Figure 14.  $^{13}\text{C}$ -NMR spectrum of compound (7a)

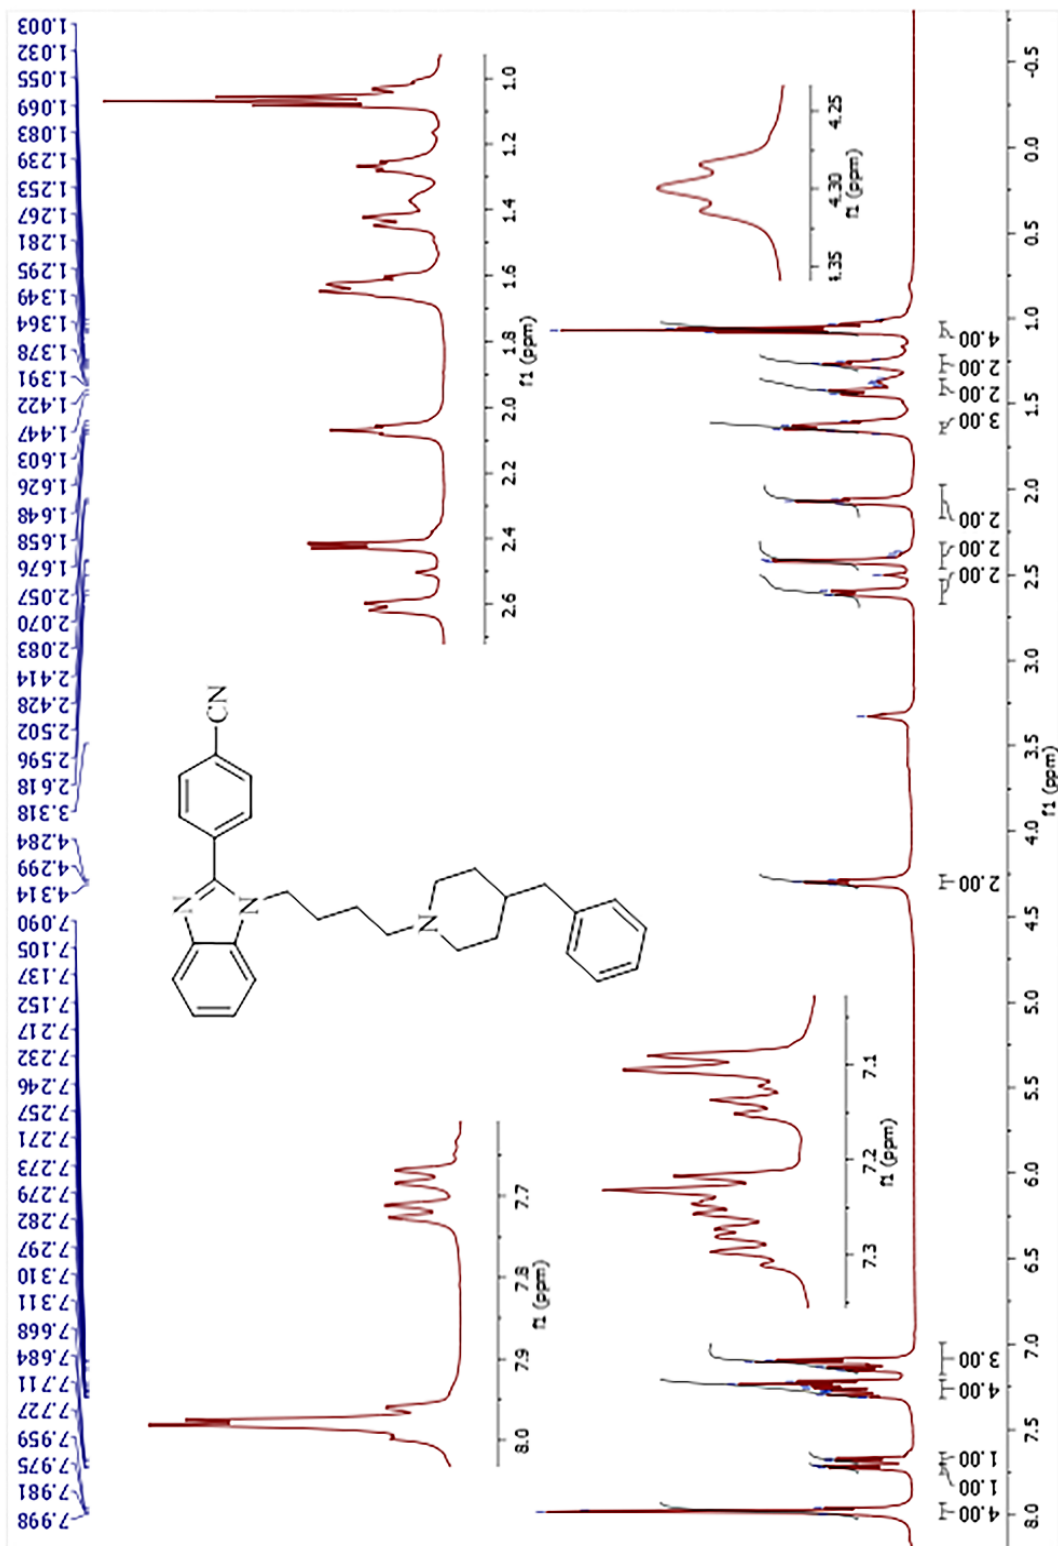

Figure 15. <sup>1</sup>H-NMR spectrum of compound (7b)

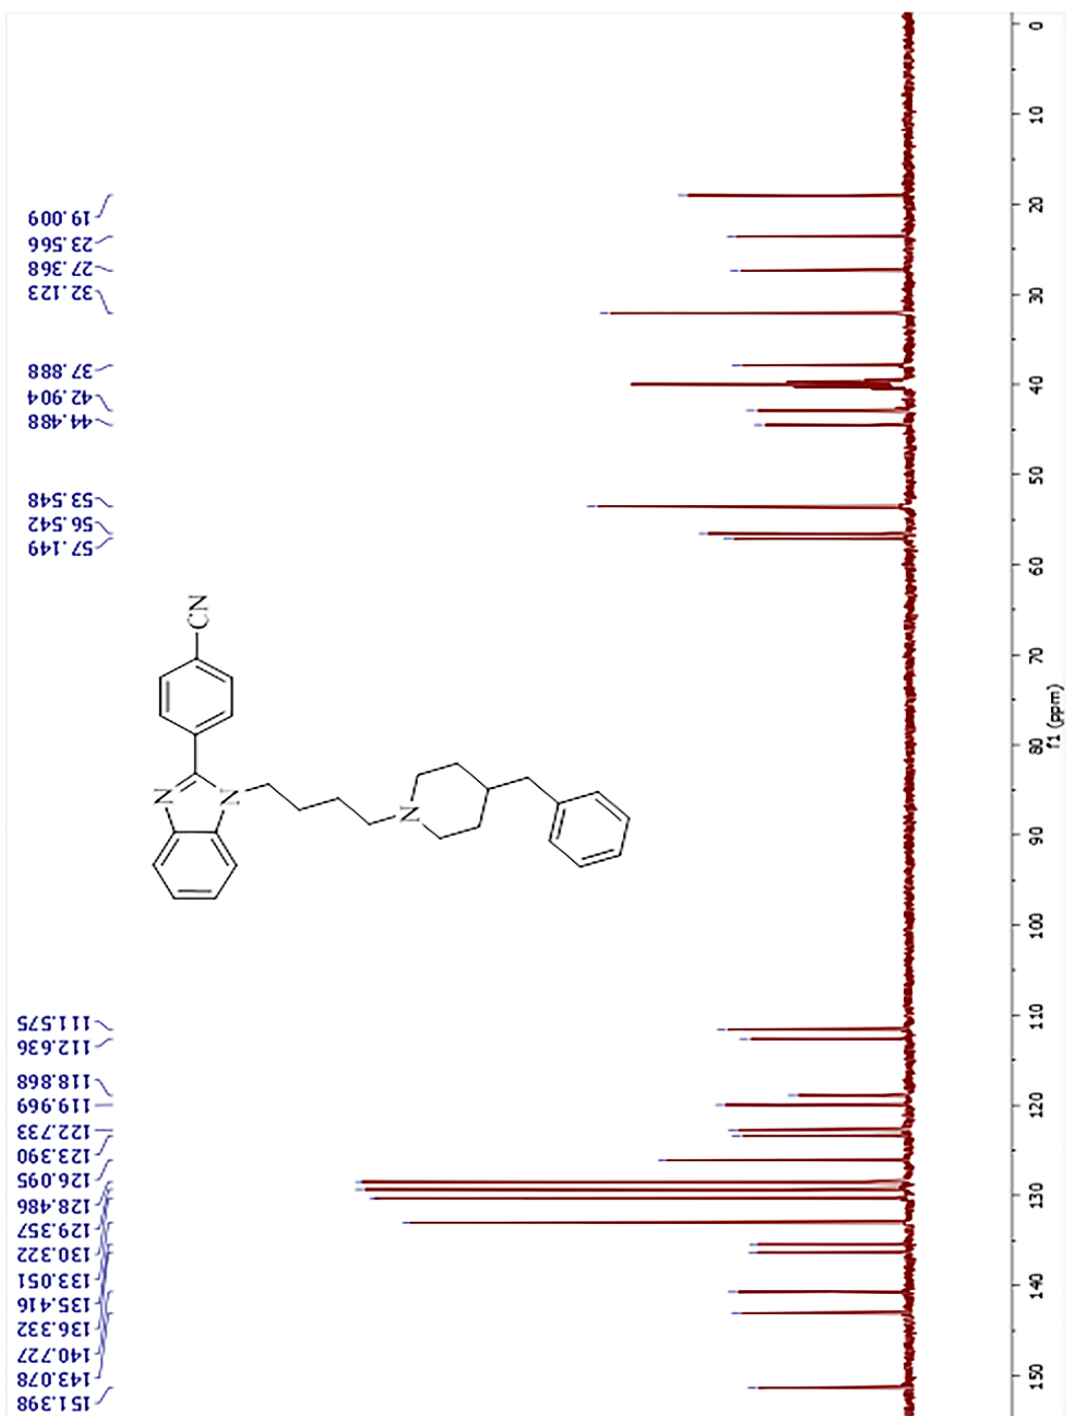

Figure 16.  $^{13}\text{C}$ -NMR spectrum of compound (7b)

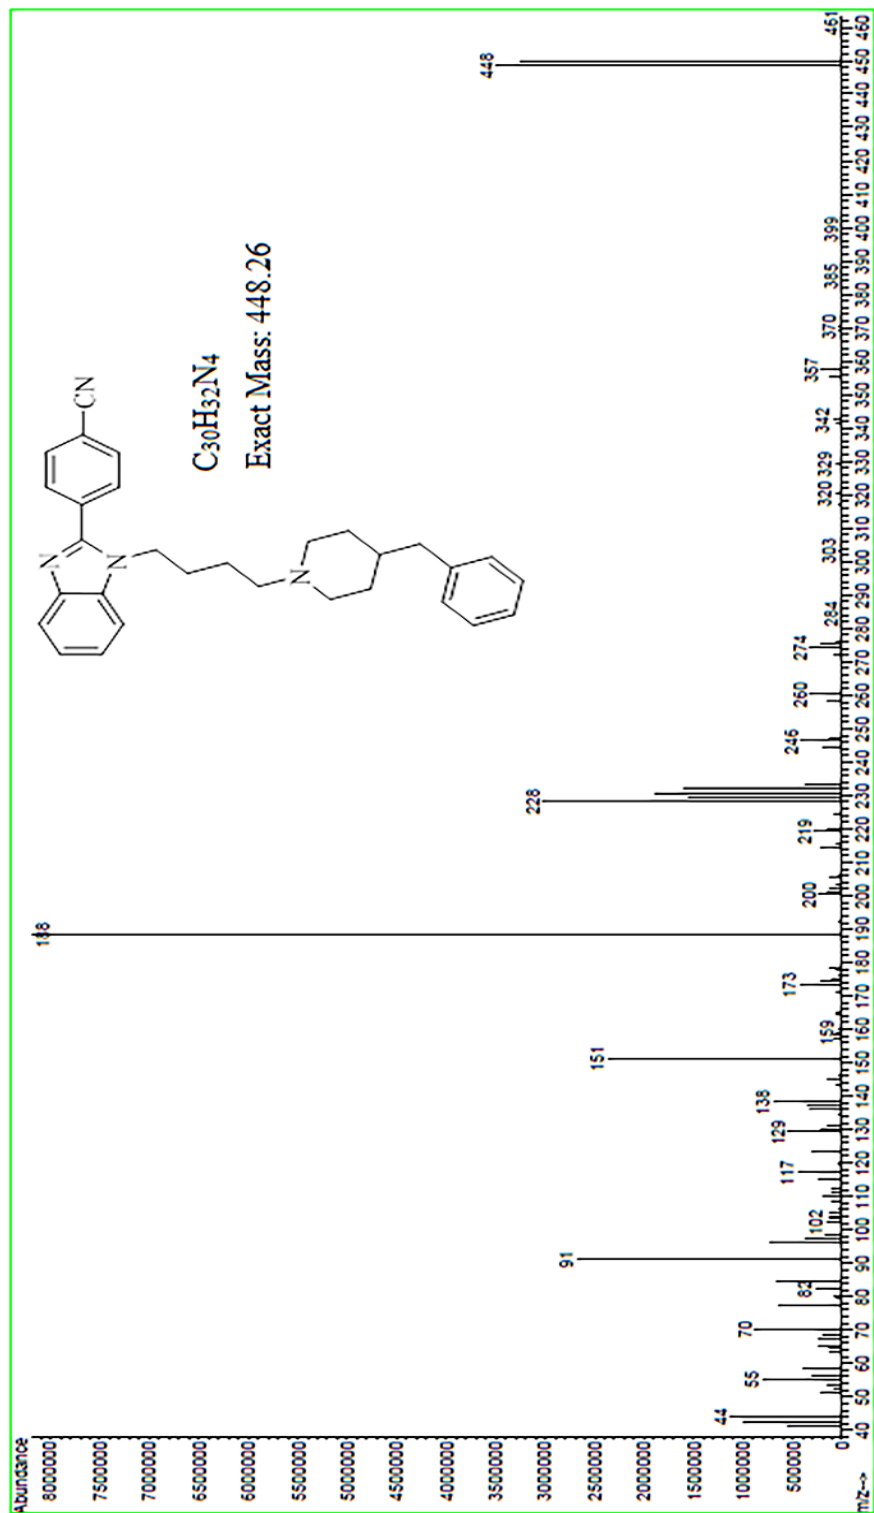

Figure 17. MASS spectrum of compound (7b)

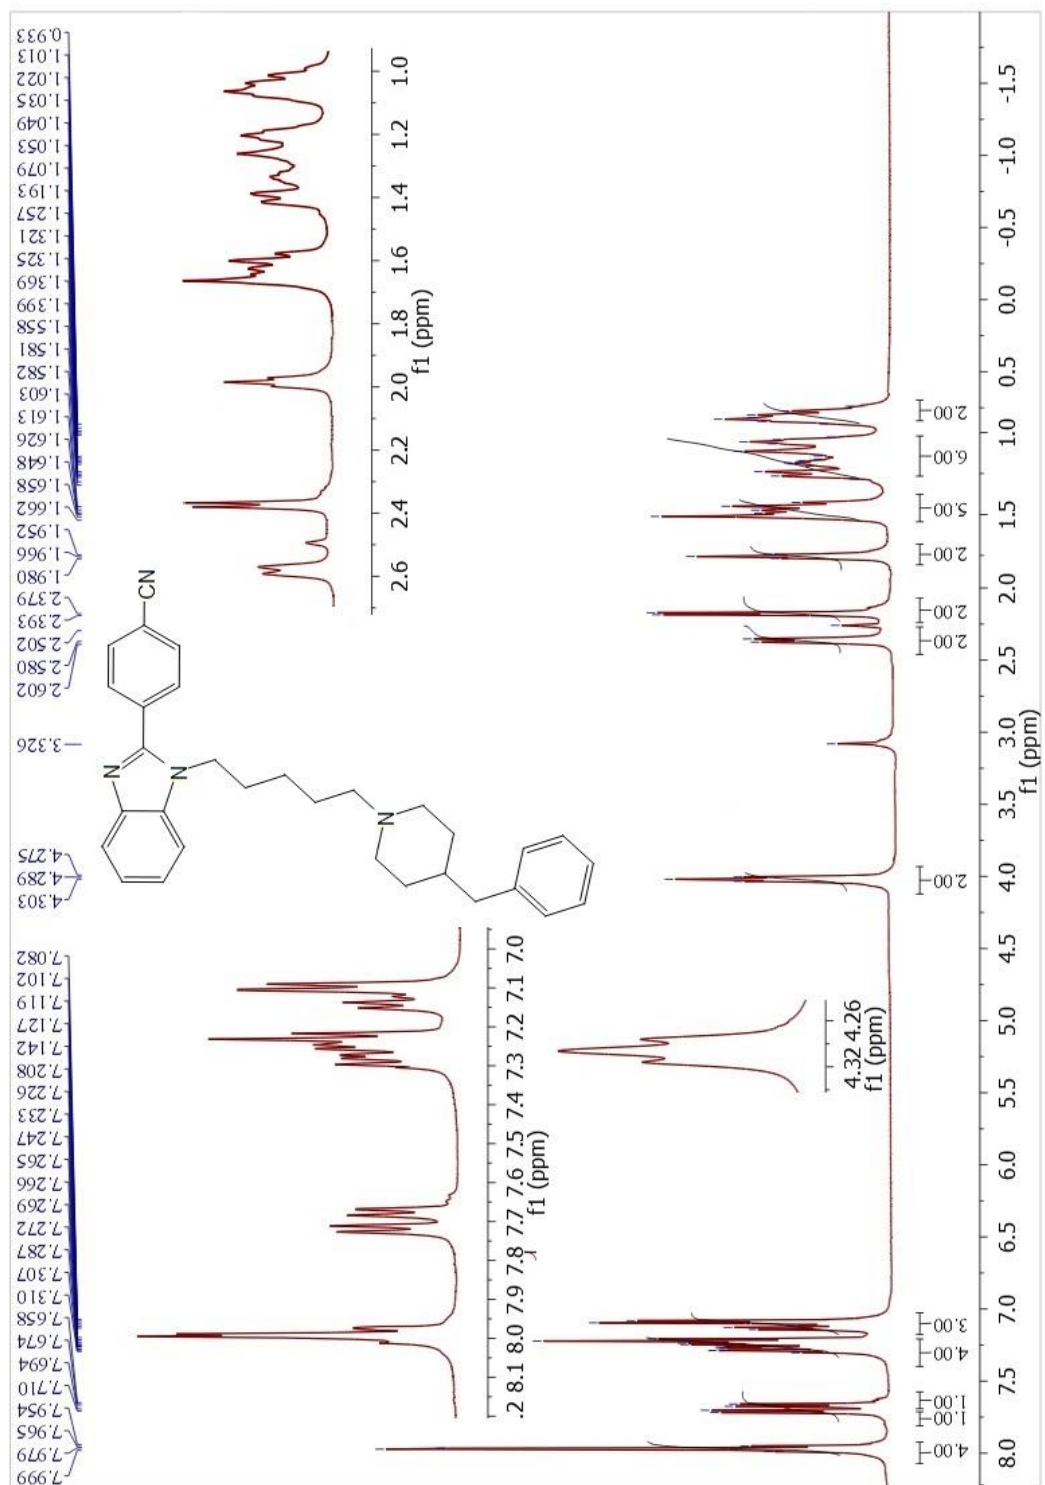

Figure 18.  $^1\text{H-NMR}$  spectrum of compound (7c)

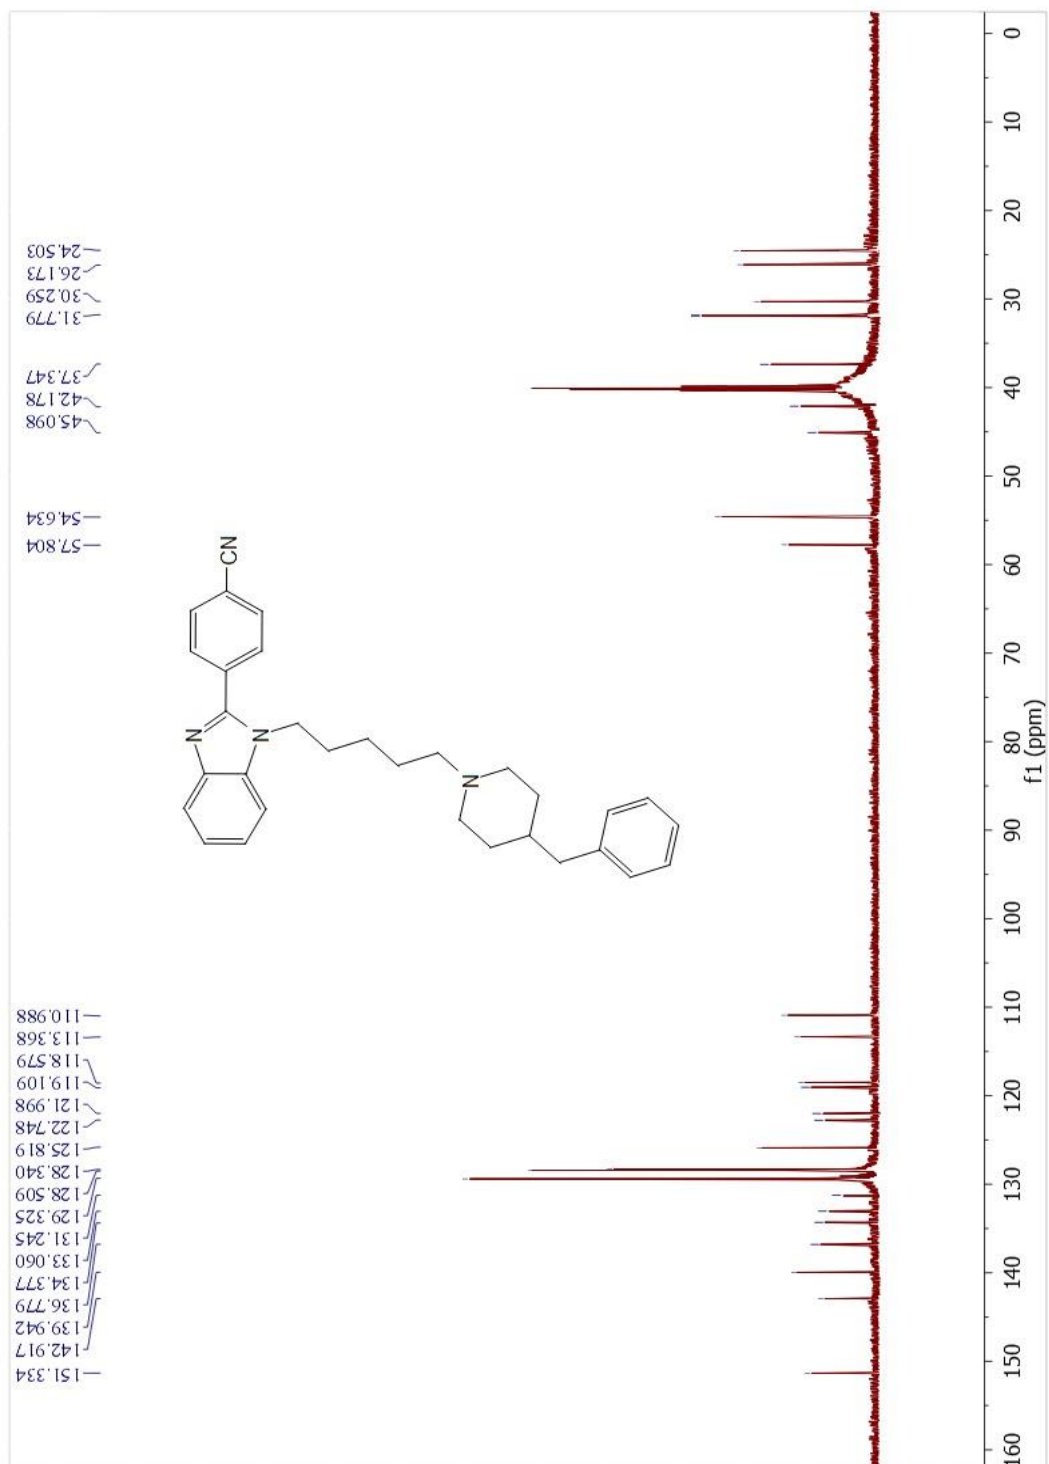

Figure 19. <sup>13</sup>C-NMR spectrum of compound (7c)



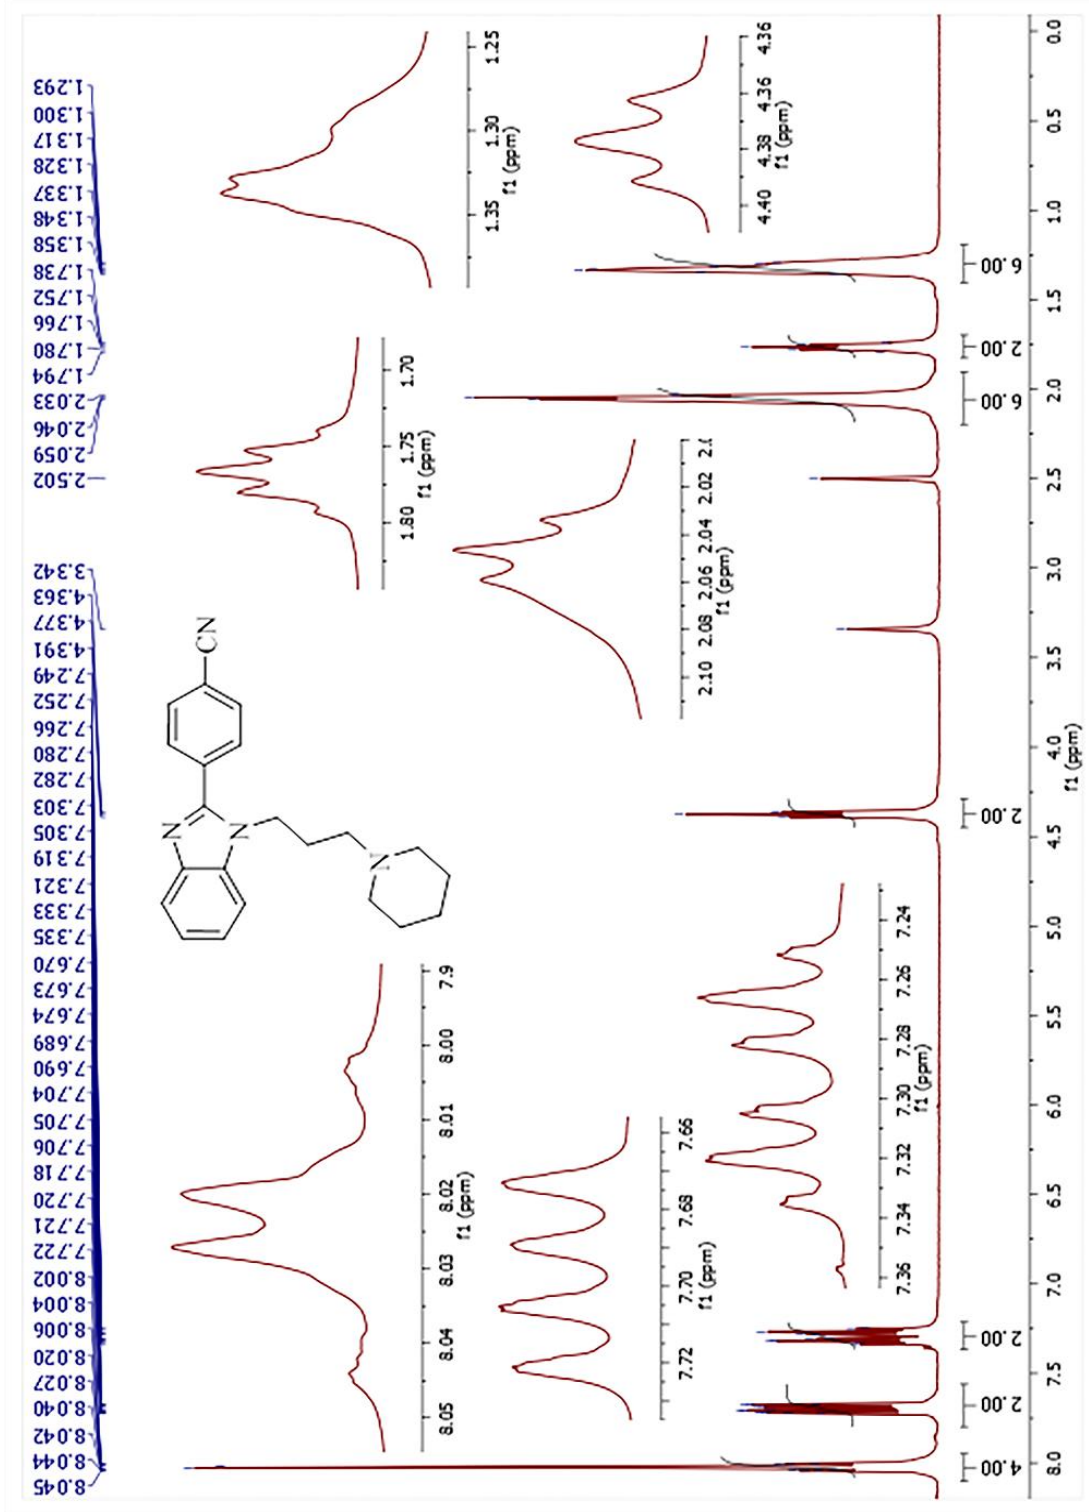

Figure 20. <sup>1</sup>H-NMR spectrum of compound (7d)

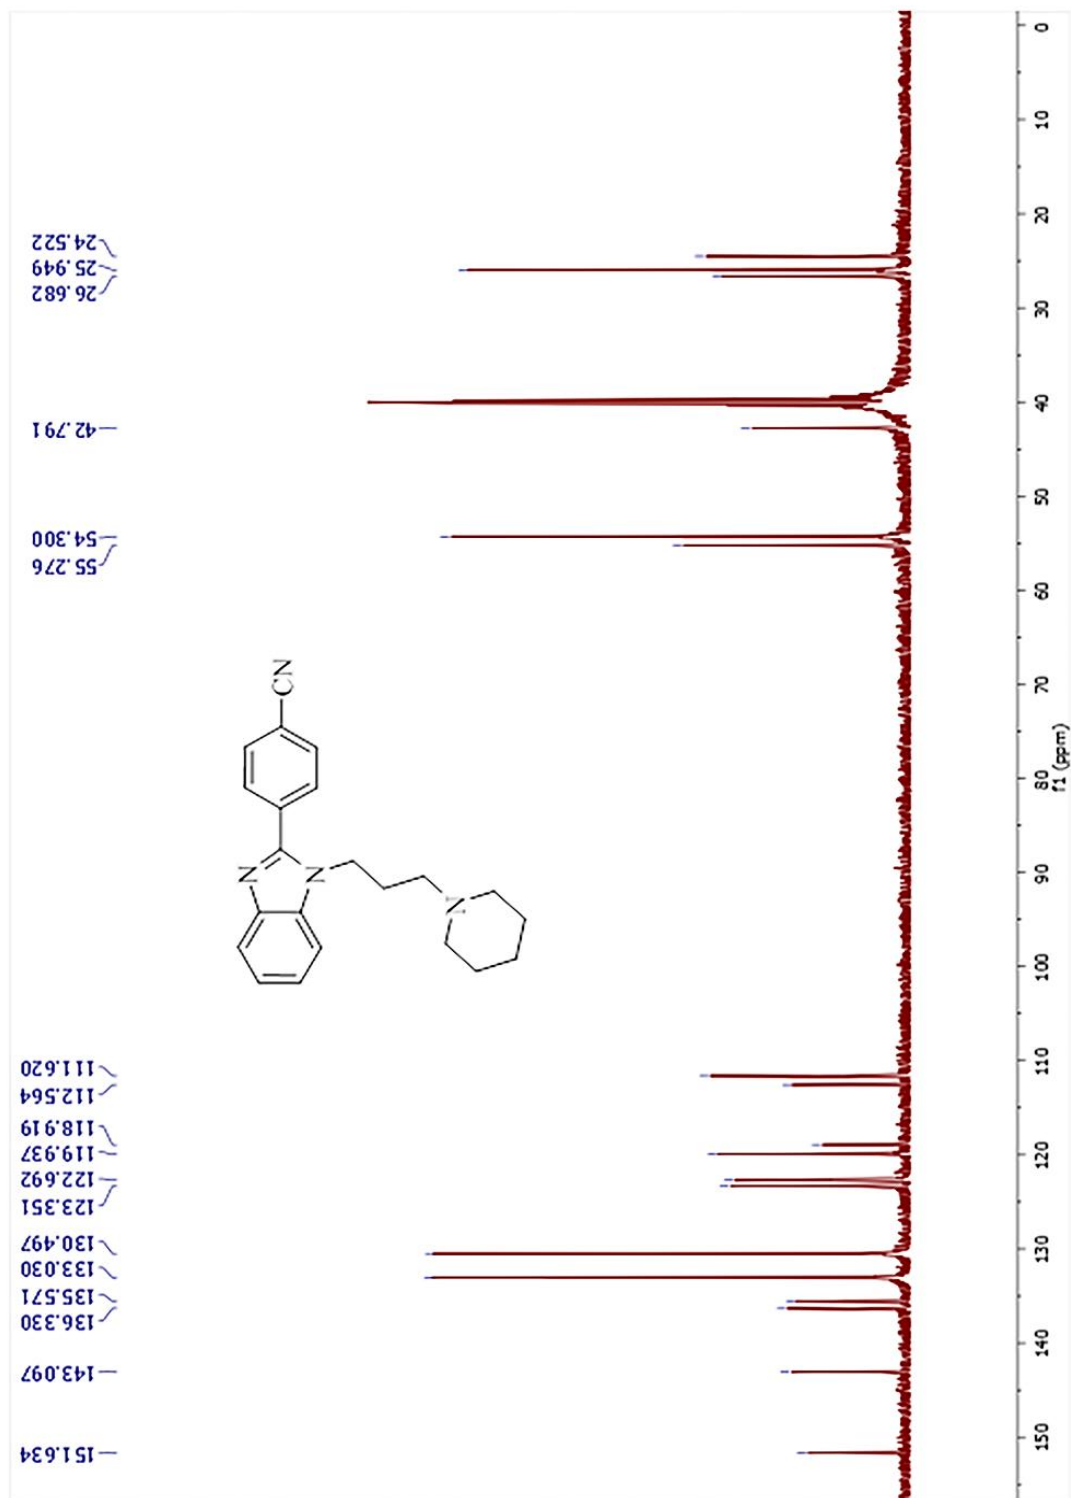

Figure 21.  $^{13}\text{C}$ -NMR spectrum of compound (7d)

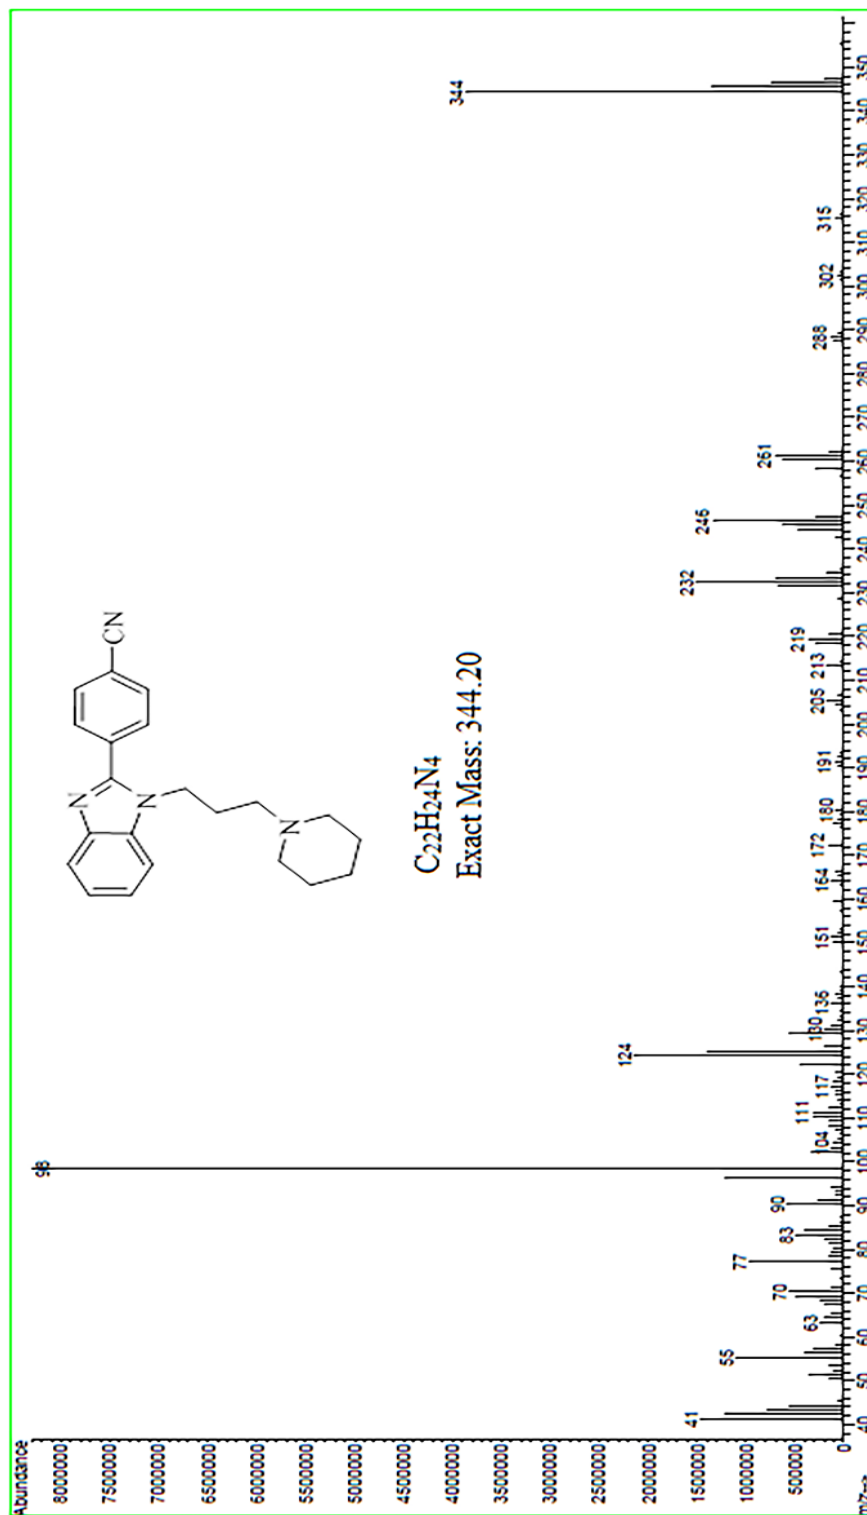

Figure 22. MASS spectrum of compound (7d)

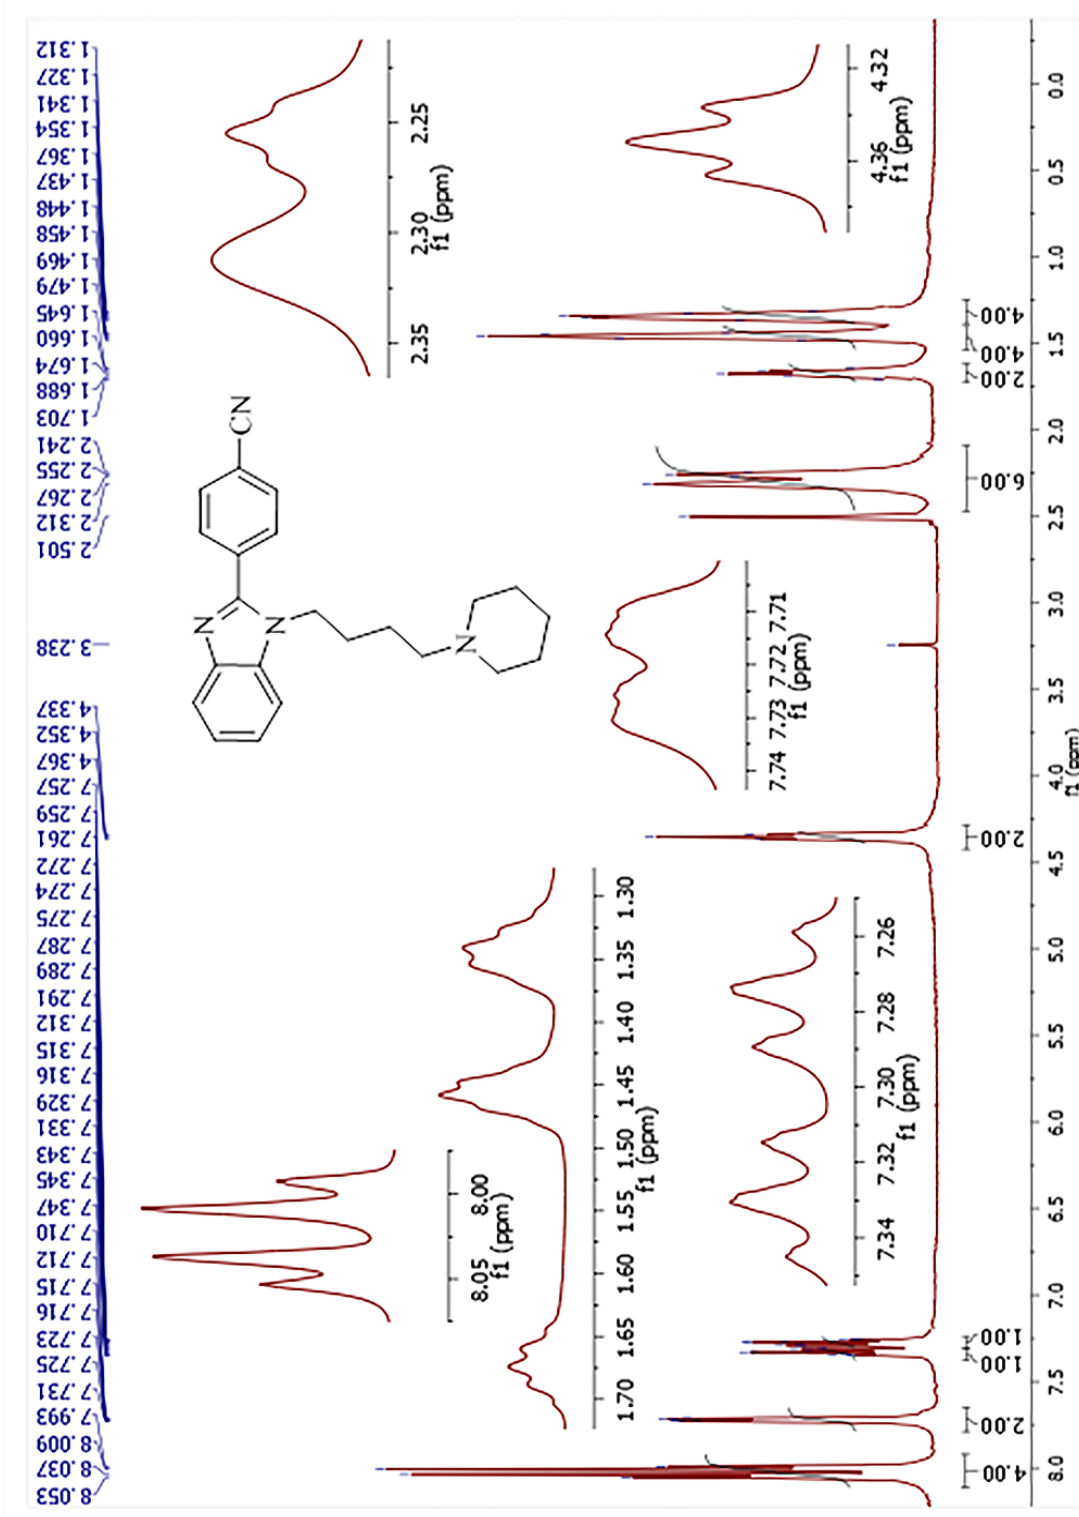

Figure 23.  $^1\text{H-NMR}$  spectrum of compound (7e)

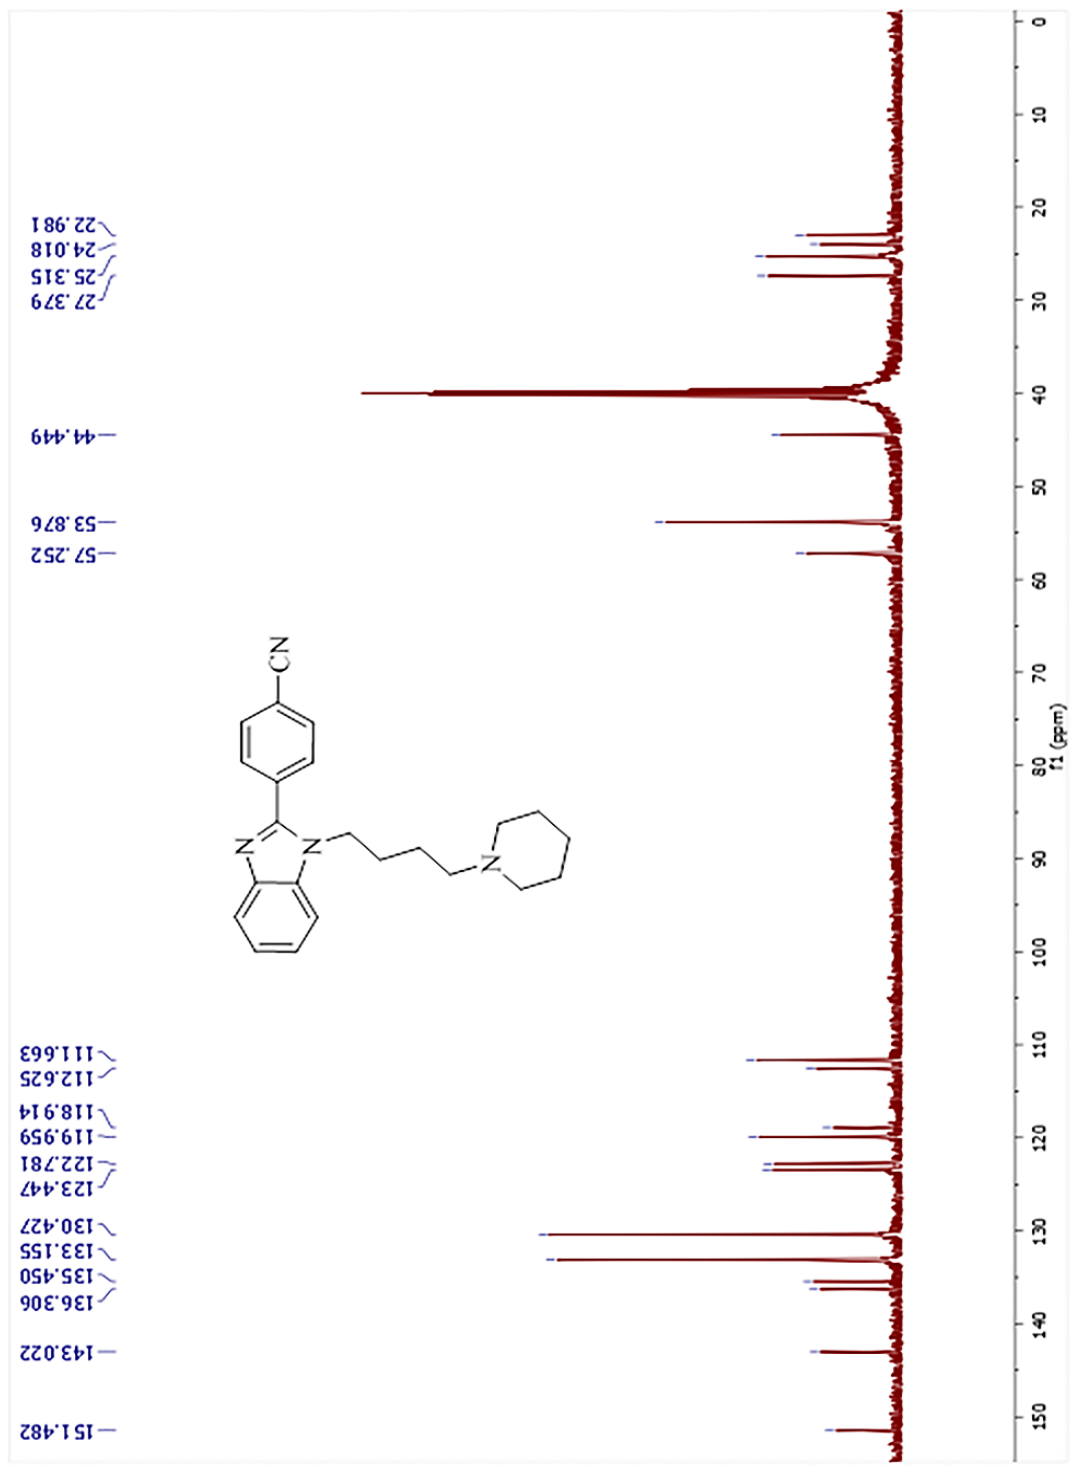

Figure 24.  $^{13}\text{C}$ -NMR spectrum of compound (7e)

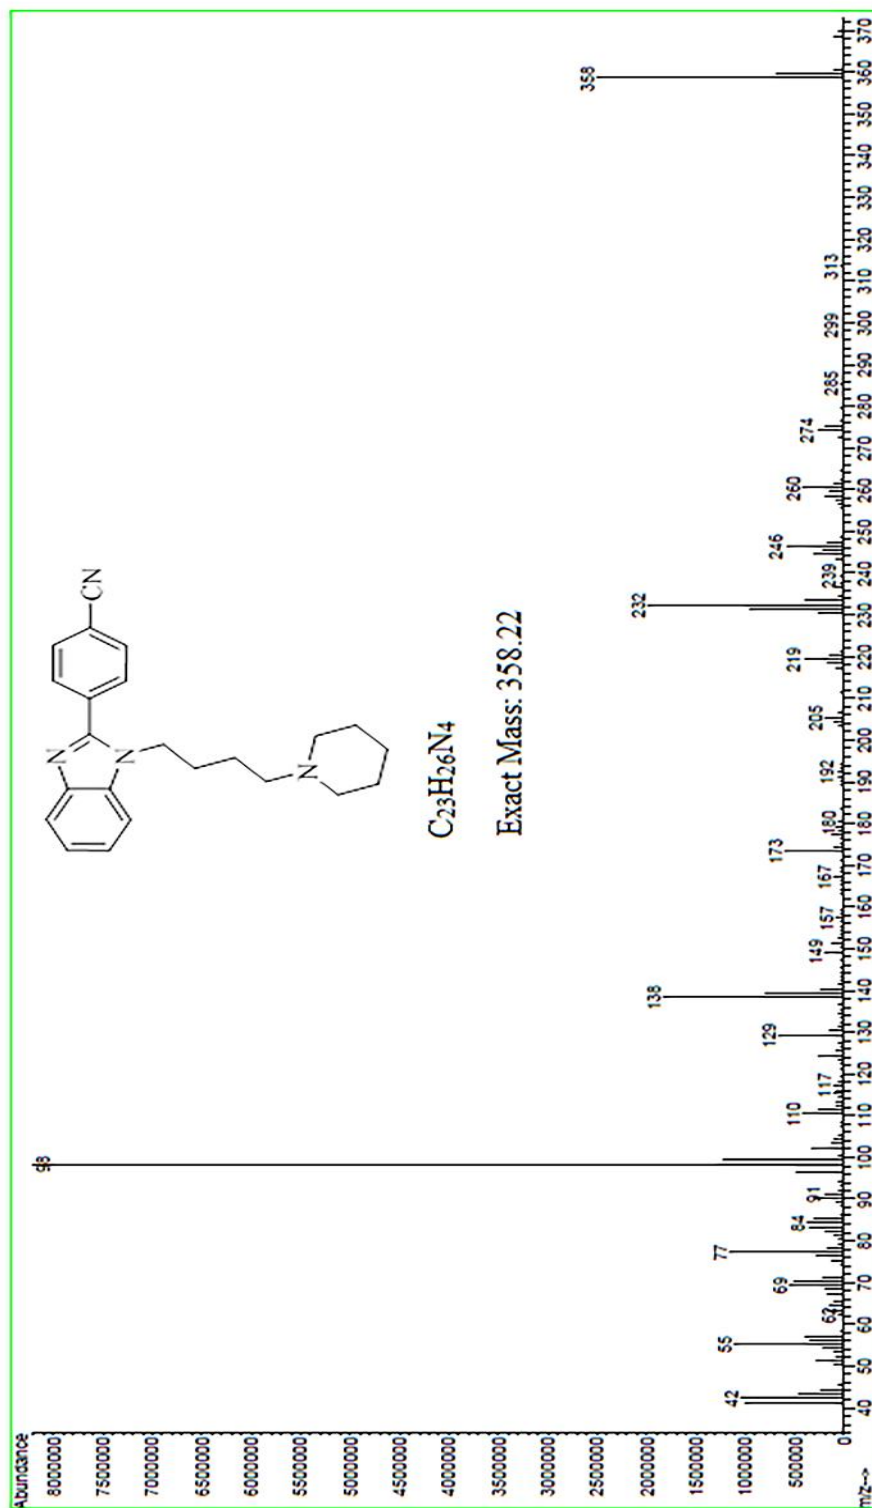

Figure 25. MASS spectrum of compound (7e)

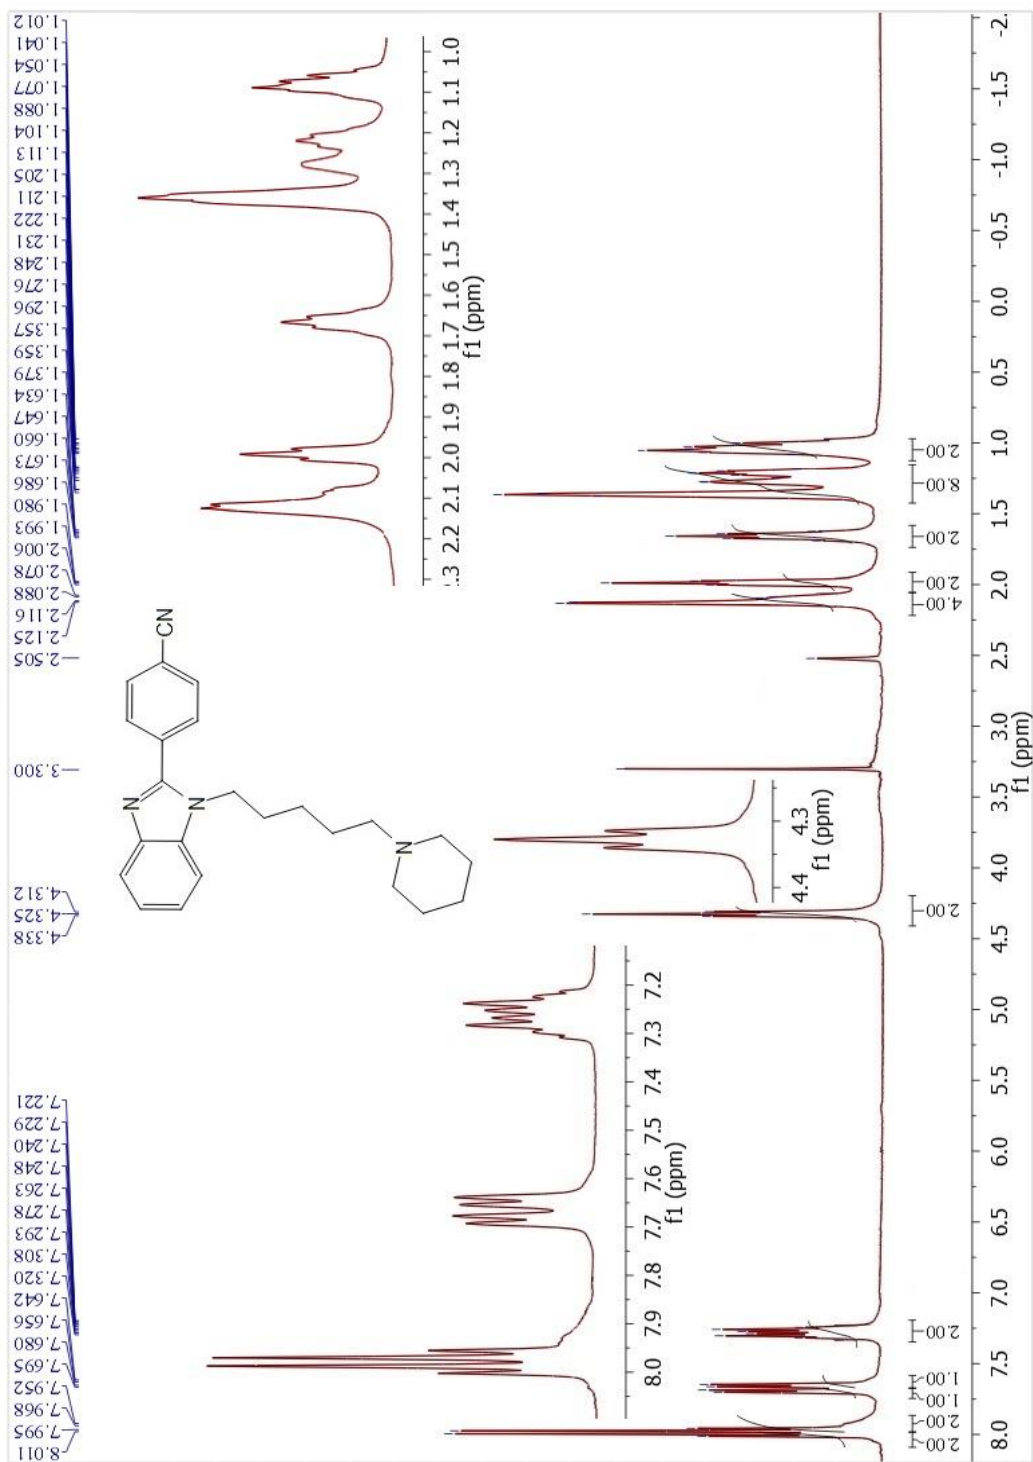

Figure 26.  $^1\text{H-NMR}$  spectrum of compound (7f)

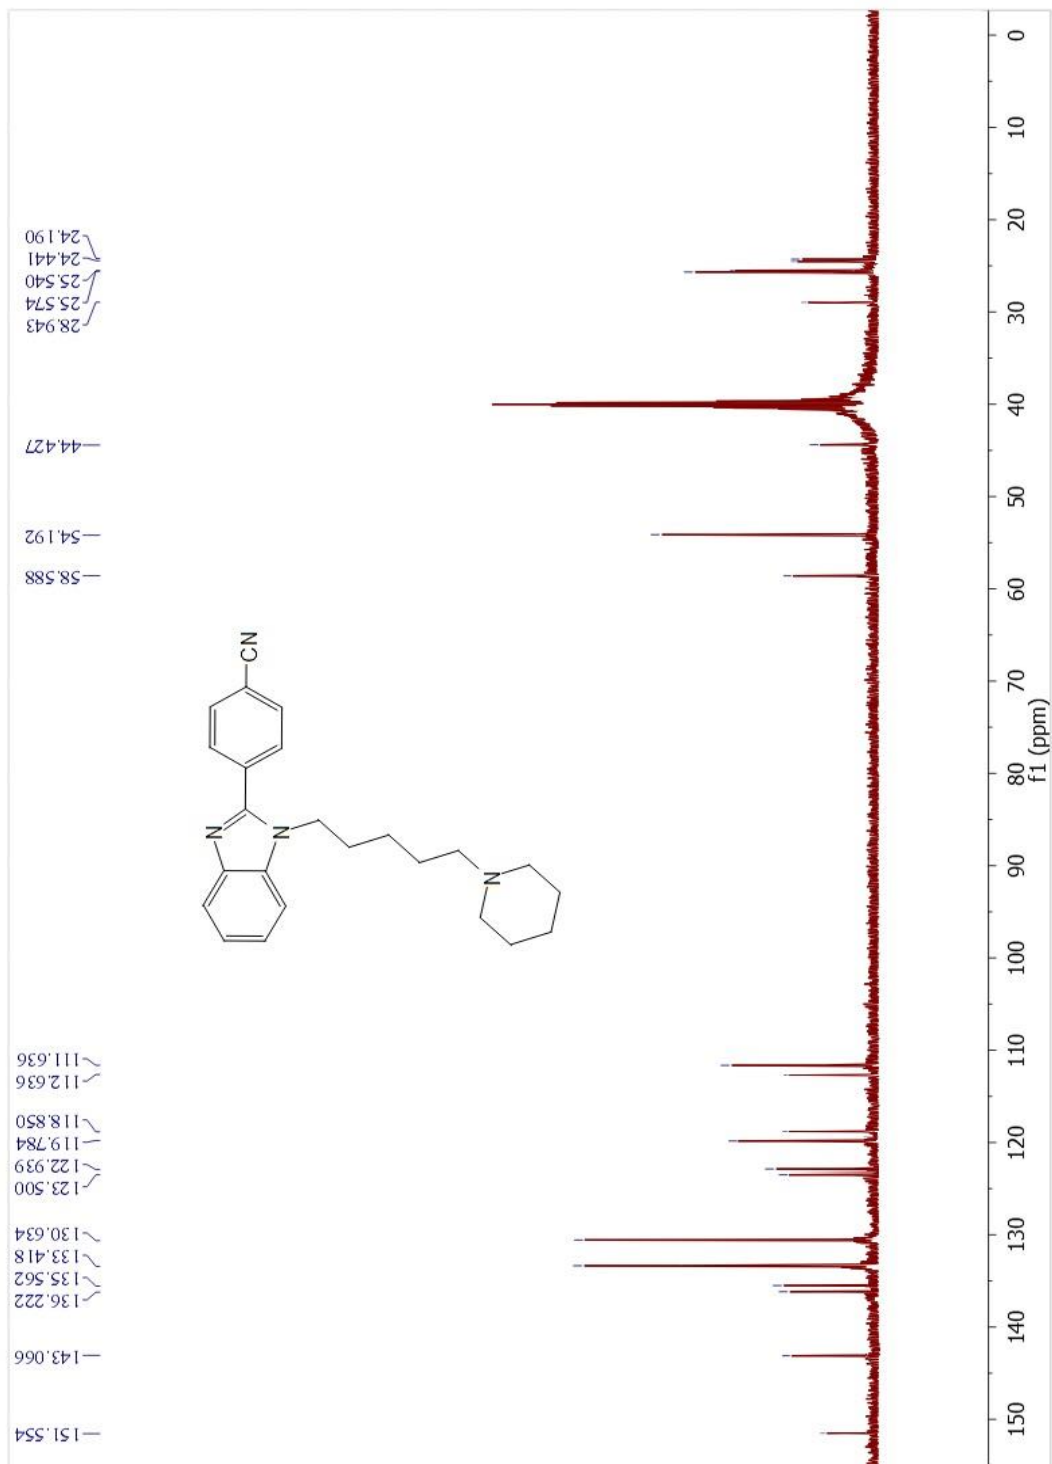

Figure 27.  $^{13}\text{C}$ -NMR spectrum of compound (7f)





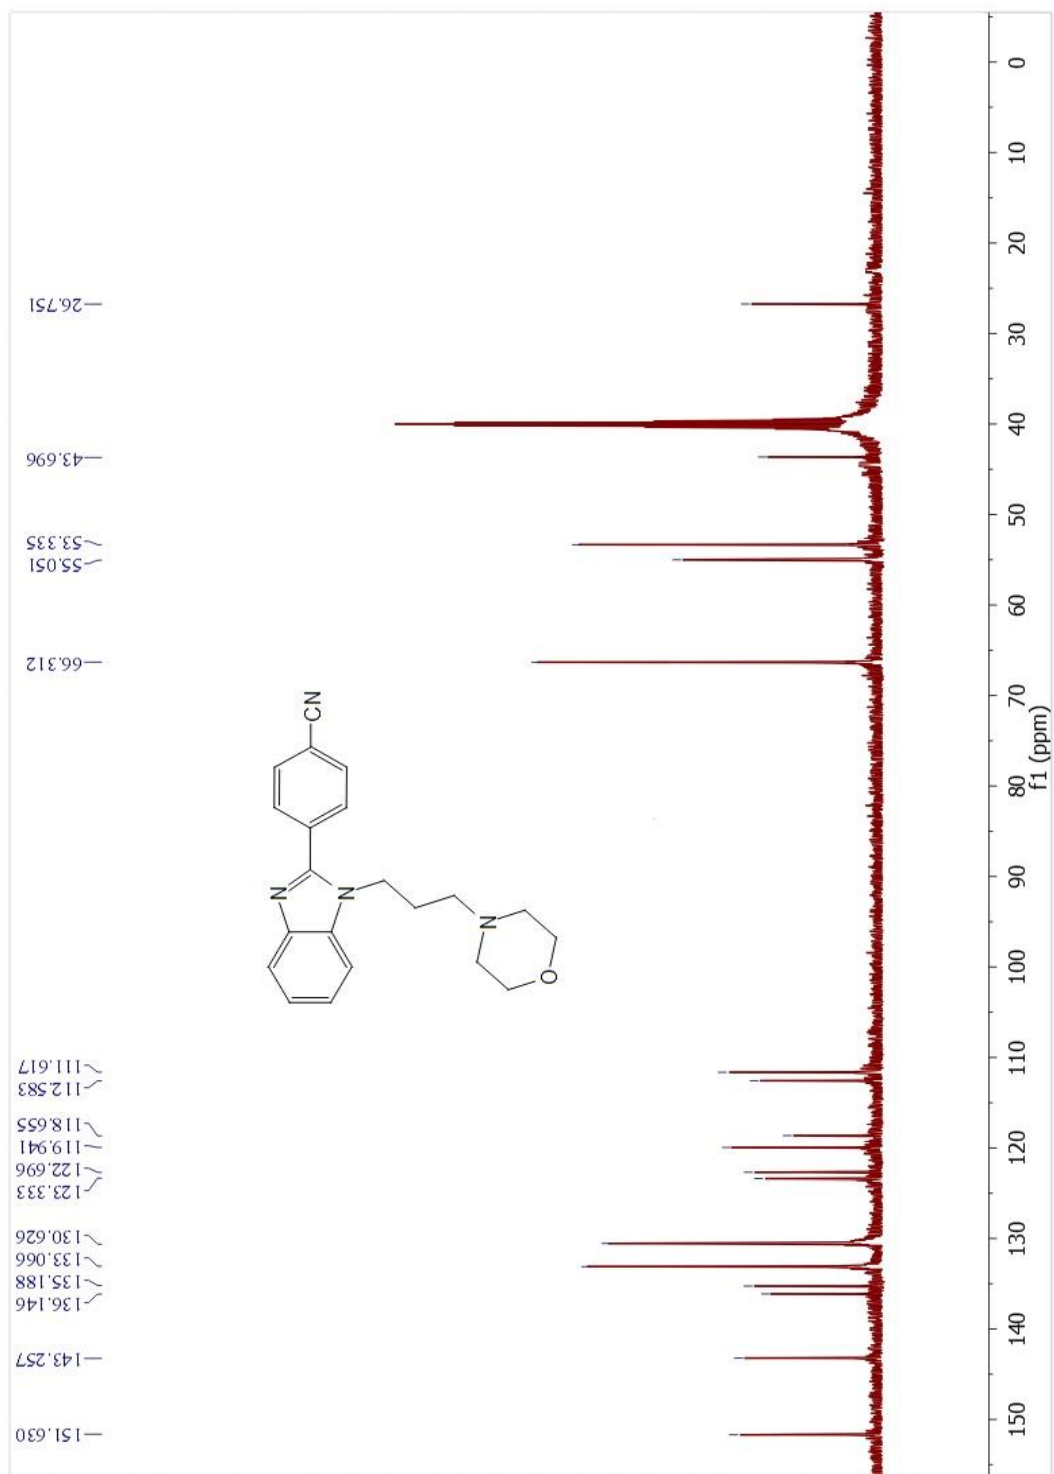

Figure 29.  $^{13}\text{C}$ -NMR spectrum of compound (7g)

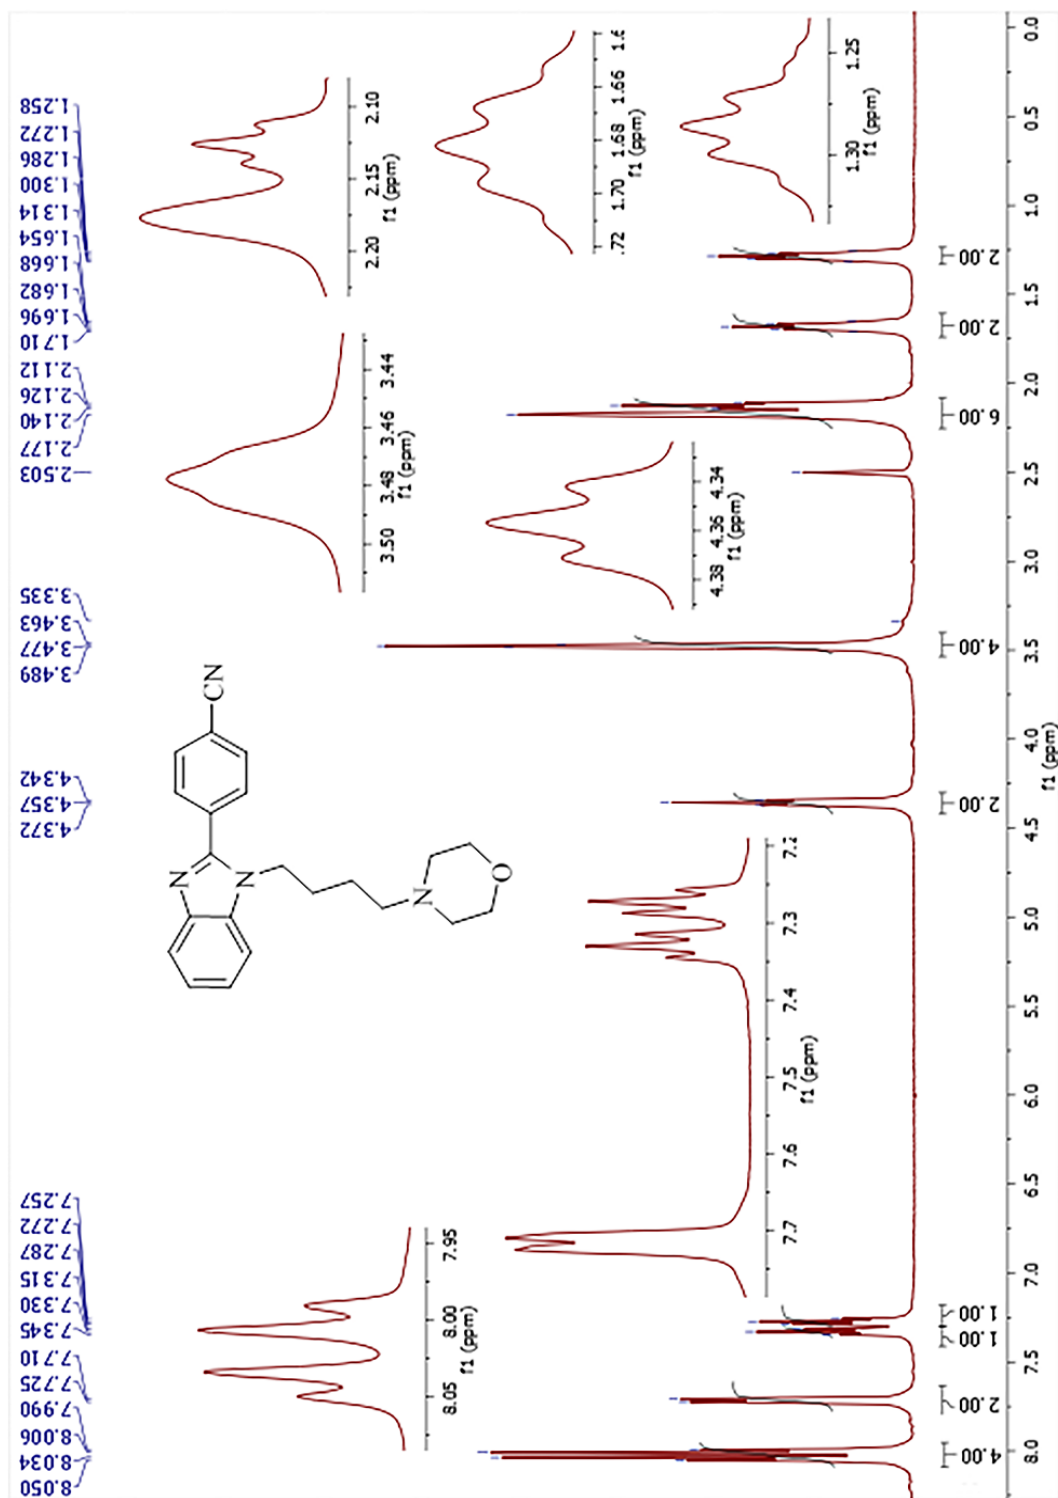

Figure 30. <sup>1</sup>H-NMR spectrum of compound (7h)

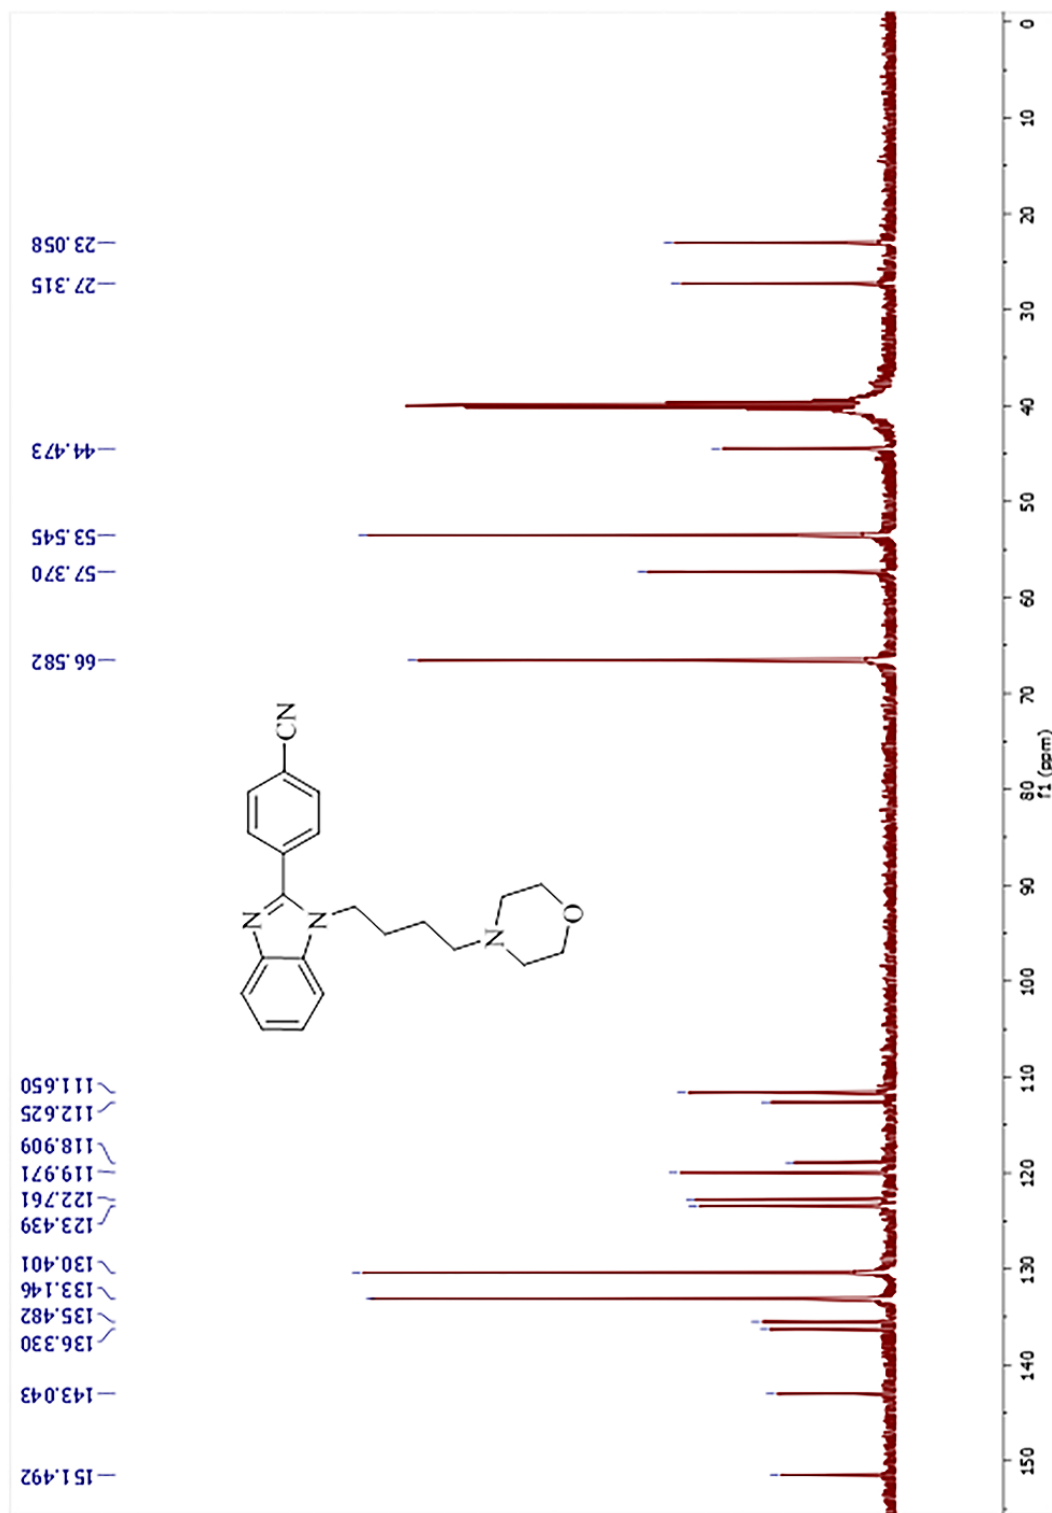

Figure 31. <sup>13</sup>C-NMR spectrum of compound (7h)

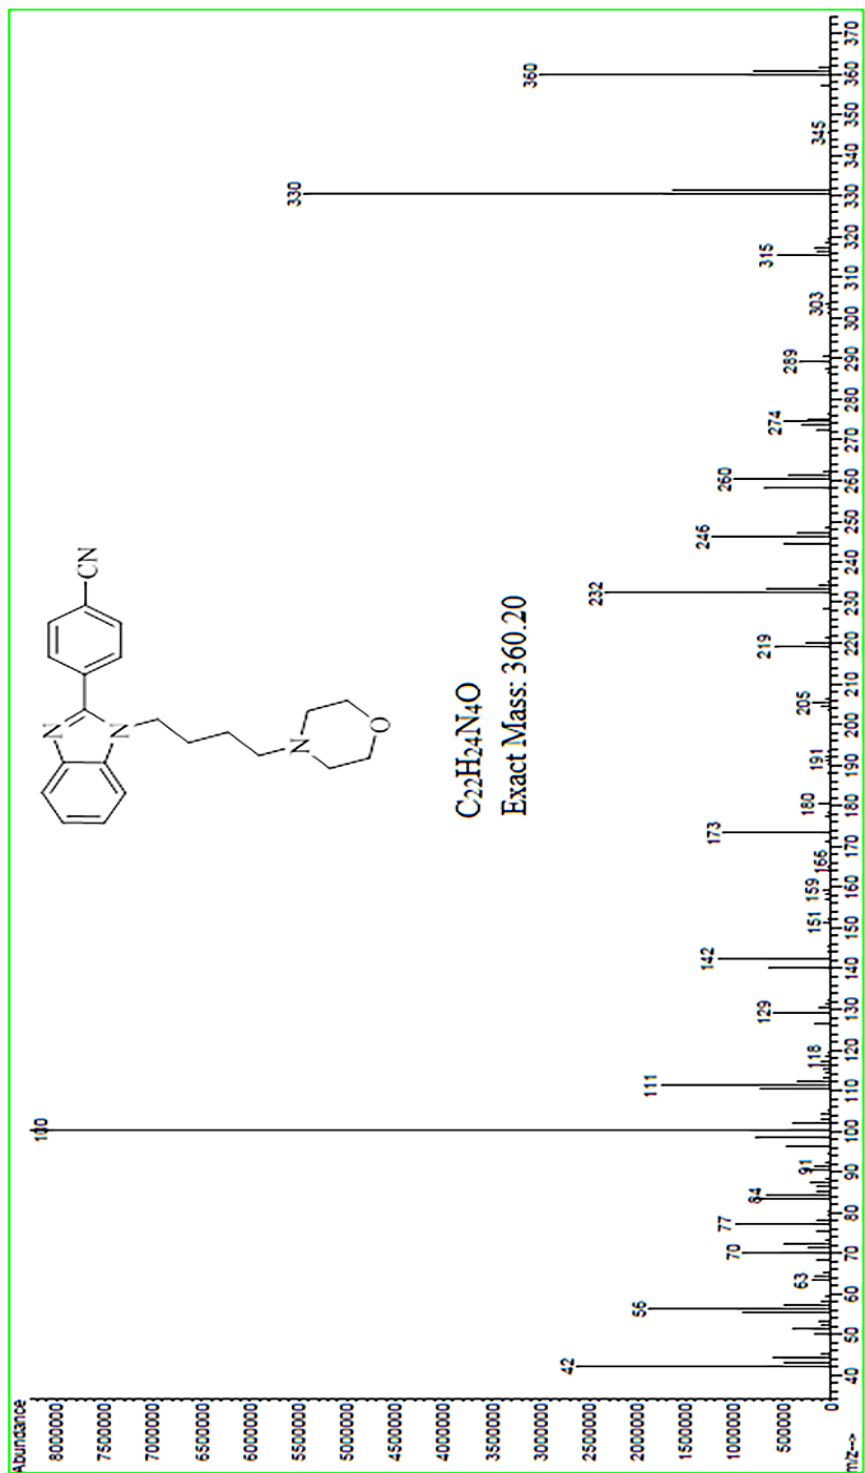

Figure 32. MASS spectrum of compound (7h)

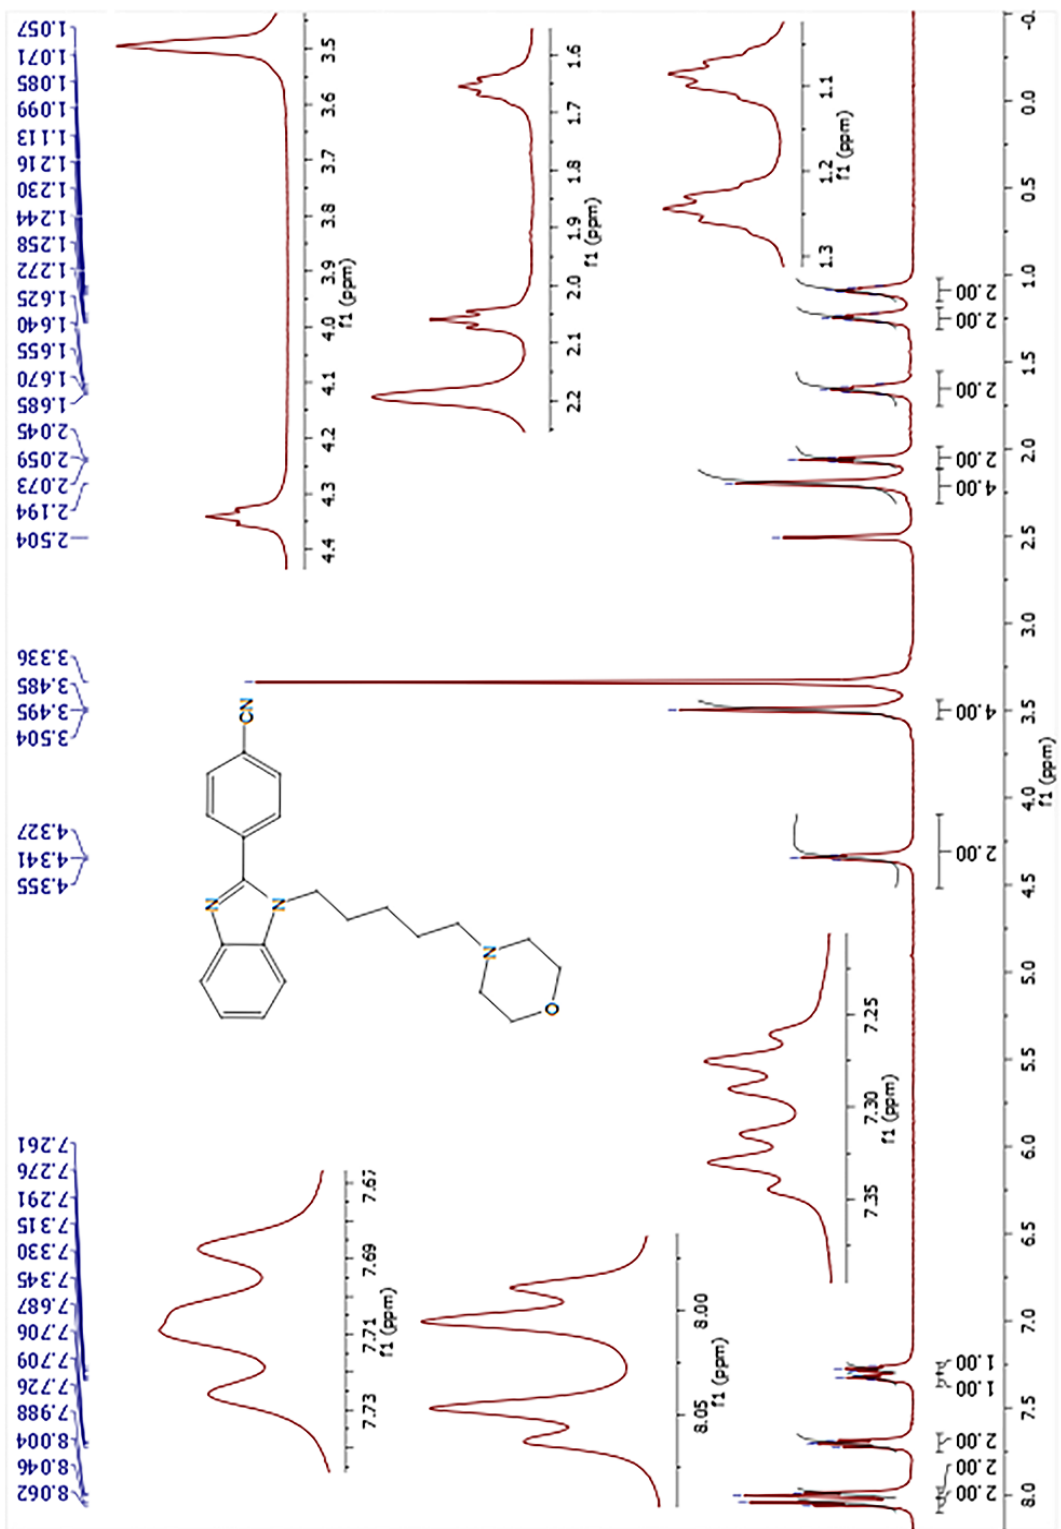

Figure 33. <sup>1</sup>H-NMR spectrum of compound (7i)

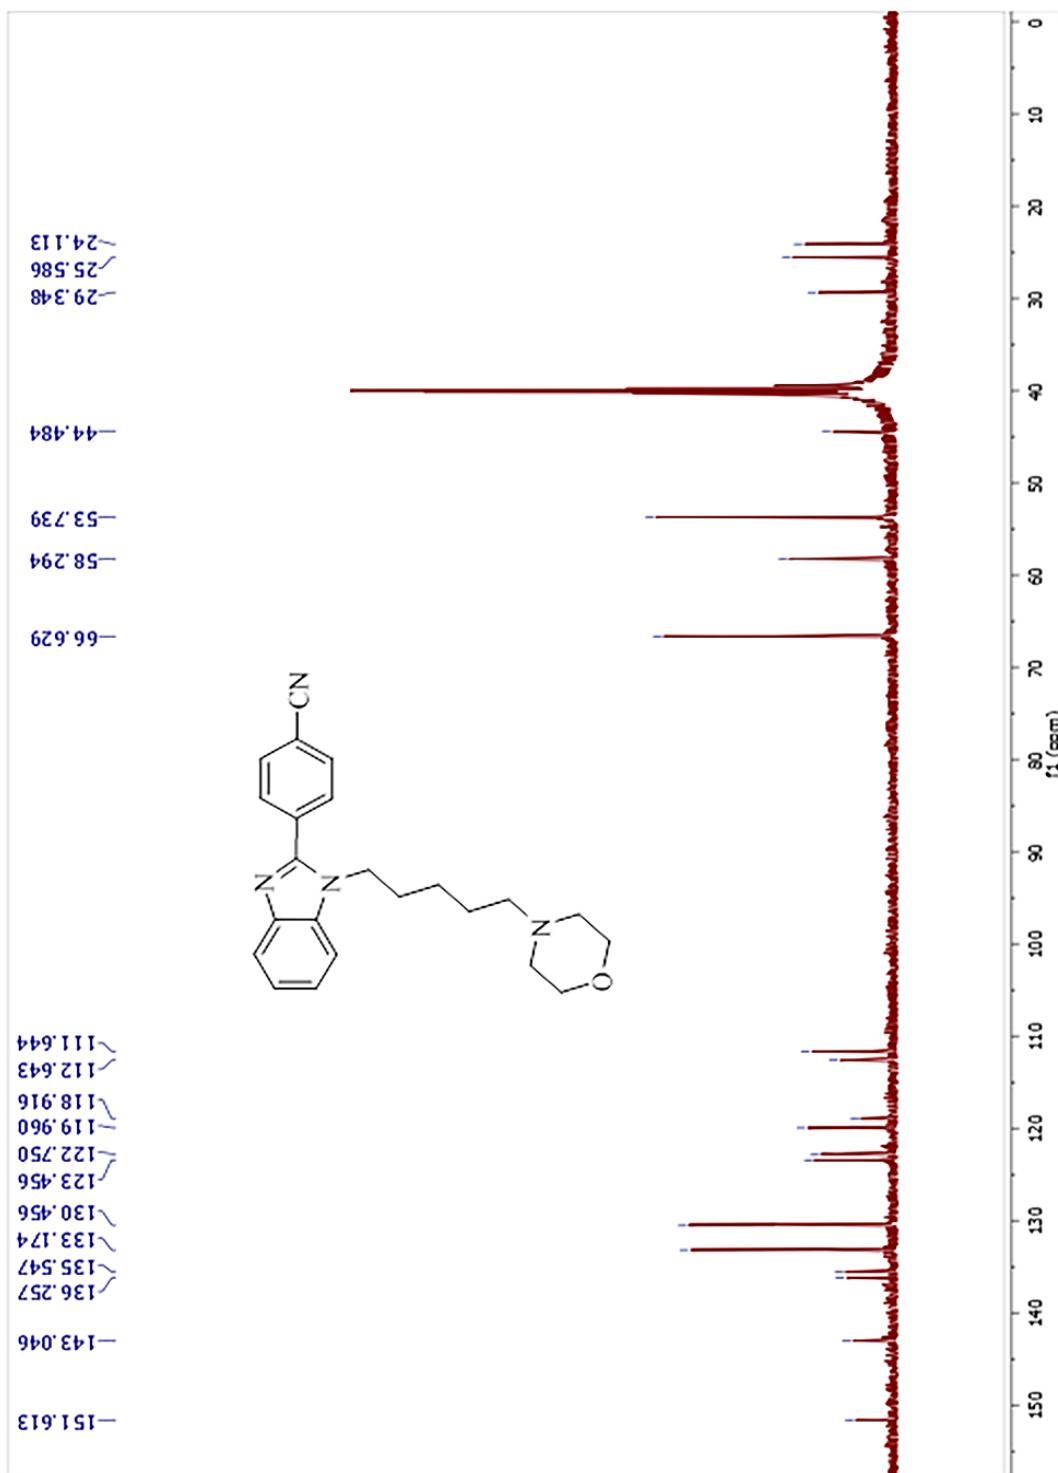

Figure 34.  $^{13}\text{C}$ -NMR spectrum of compound (7i)

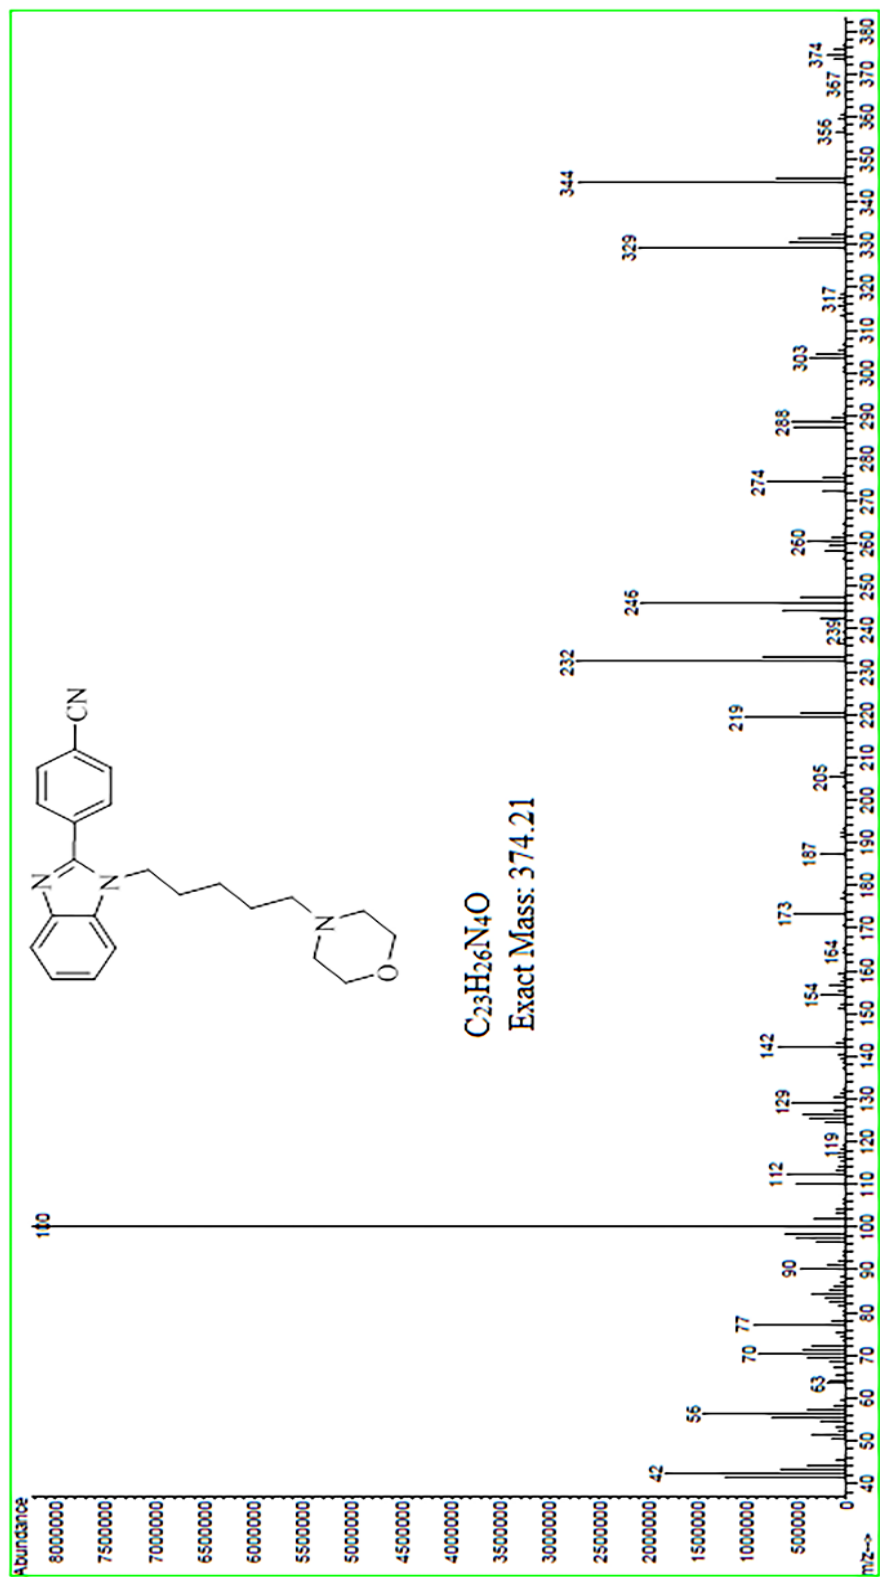

Figure 35. MASS spectrum of compound (7i)



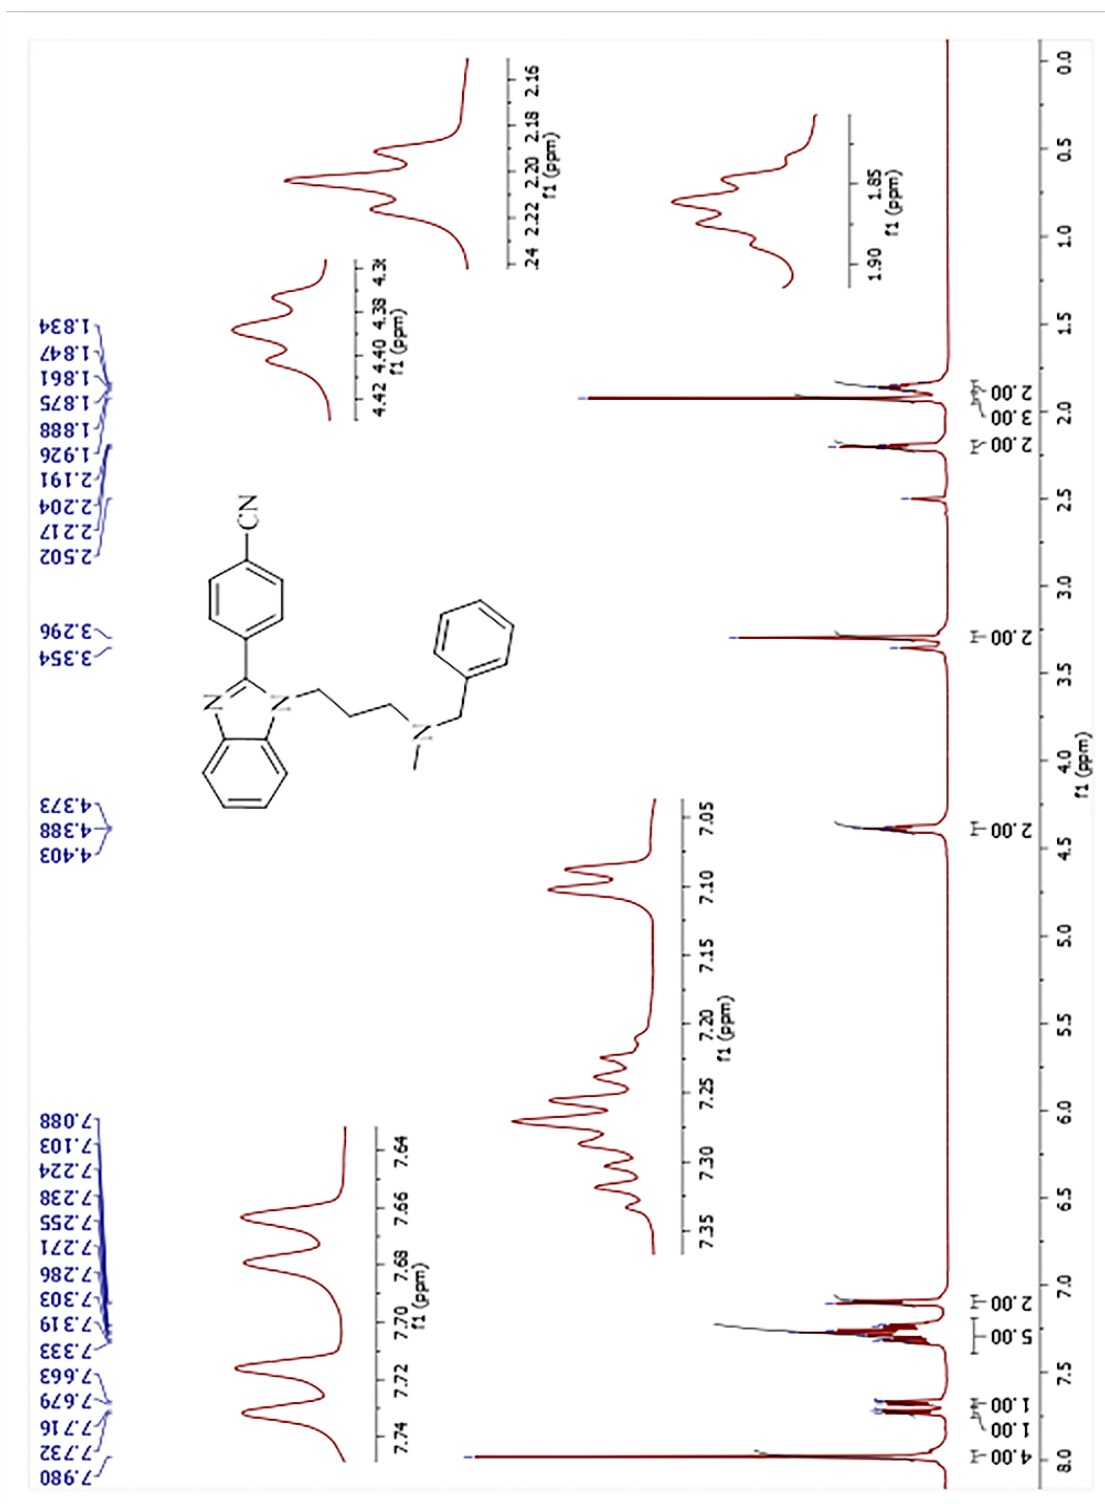

Figure 36. <sup>1</sup>H-NMR spectrum of compound (7j)

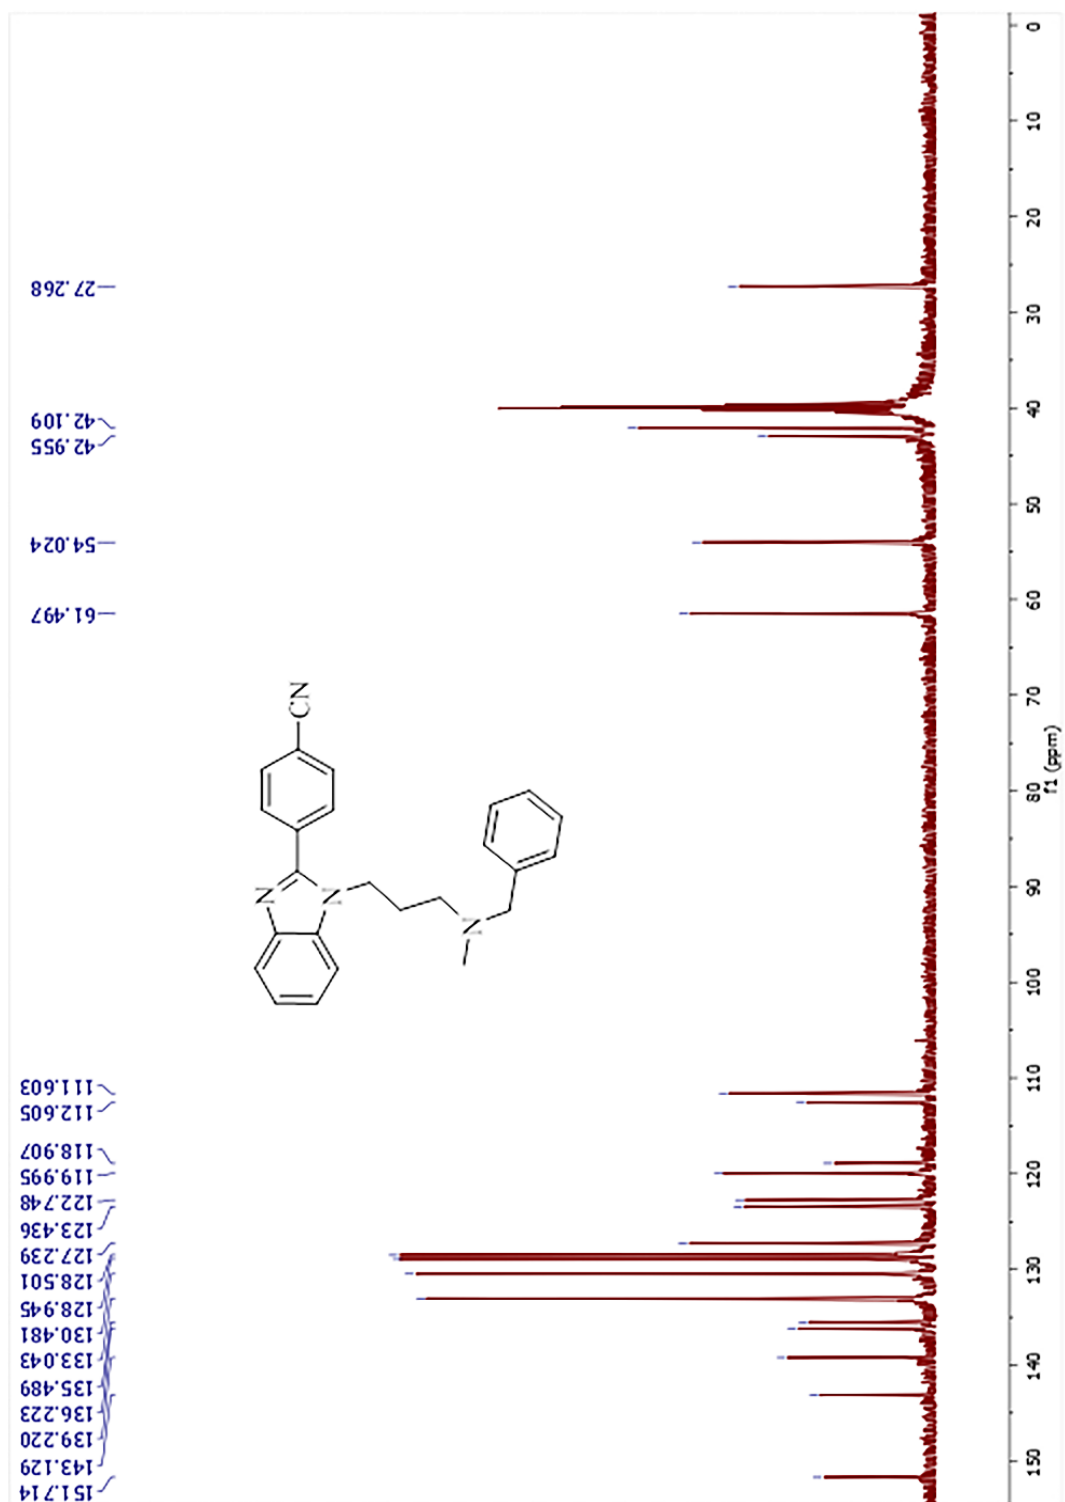

Figure 37.  $^{13}\text{C}$ -NMR spectrum of compound (7j)

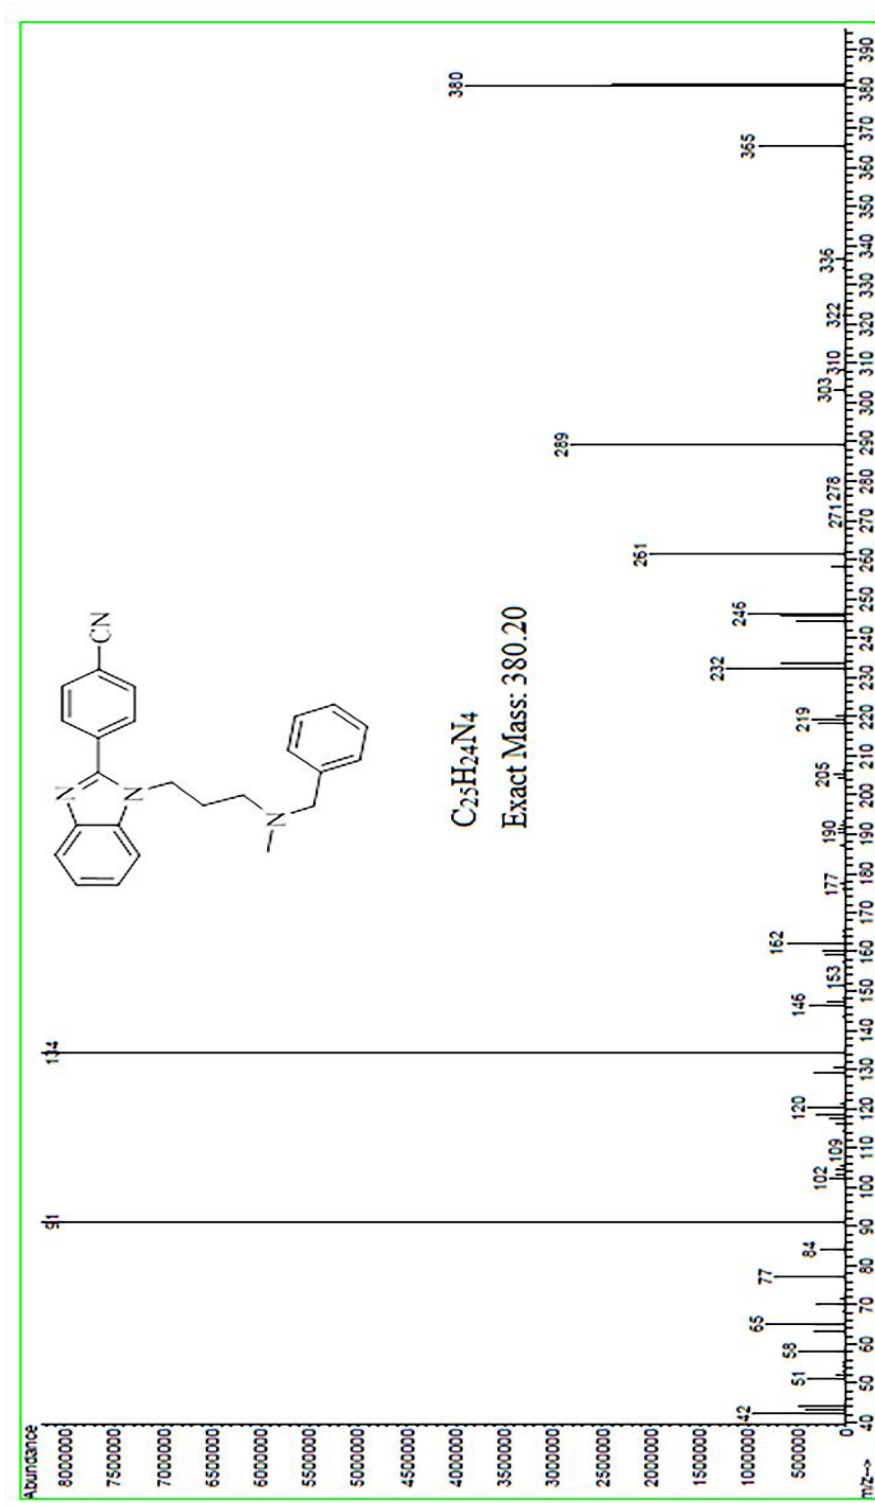

Figure 38. MASS spectrum of compound (7j)

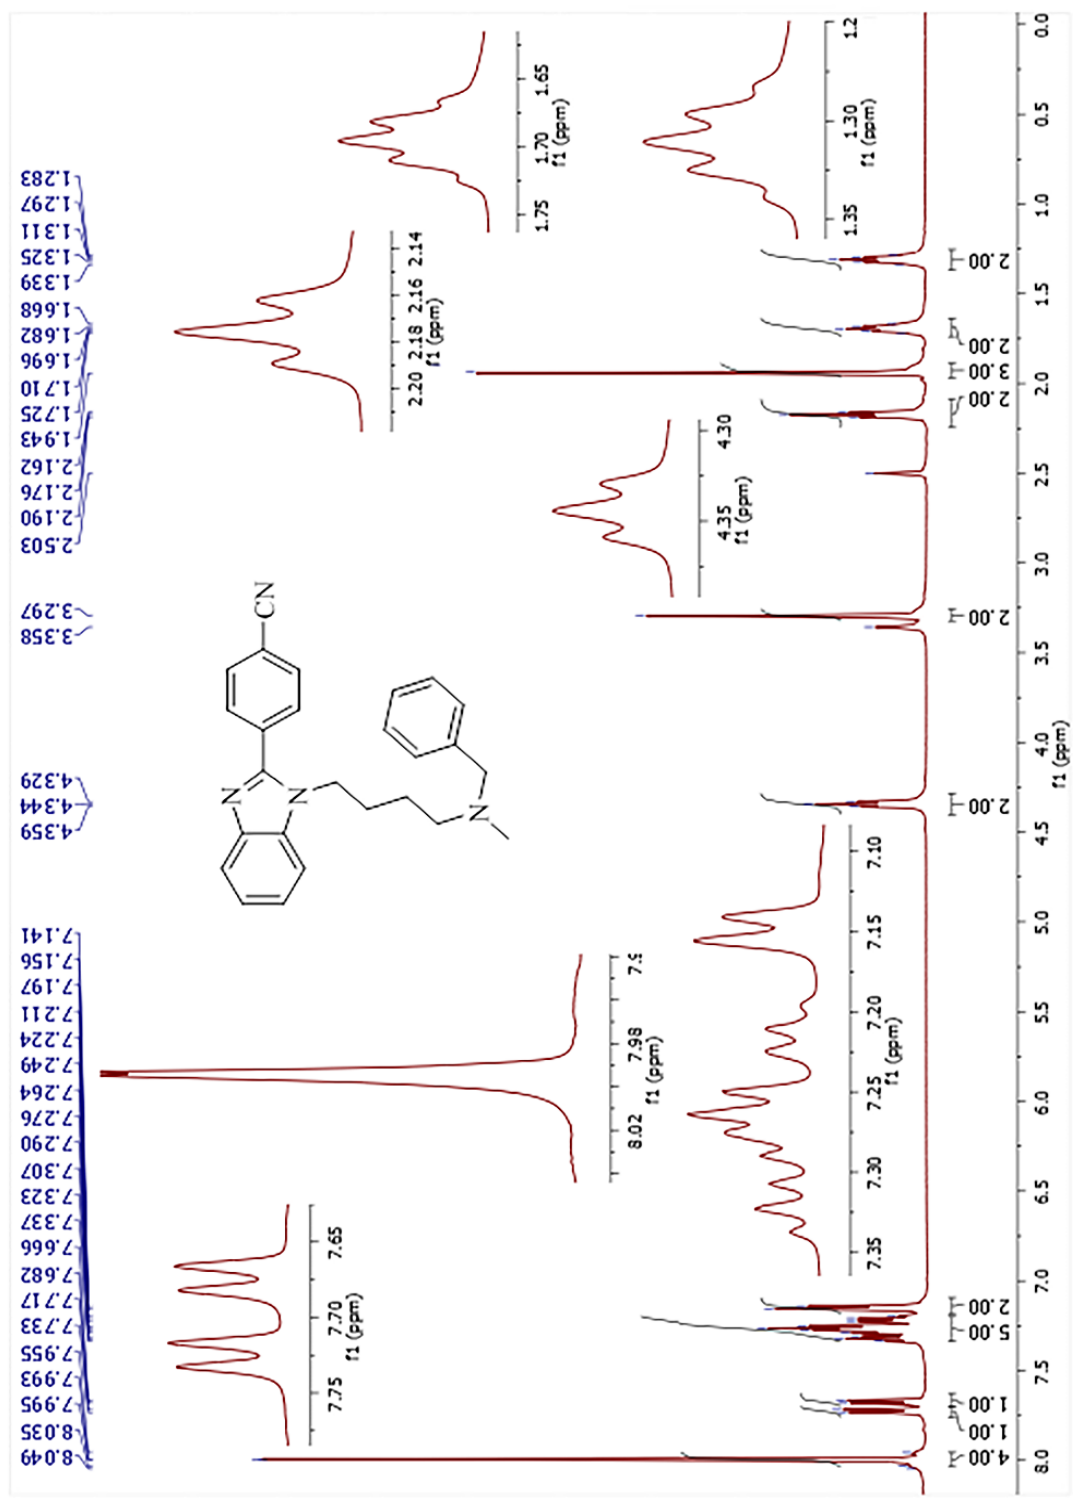

Figure 39. <sup>1</sup>H-NMR spectrum of compound (7k)

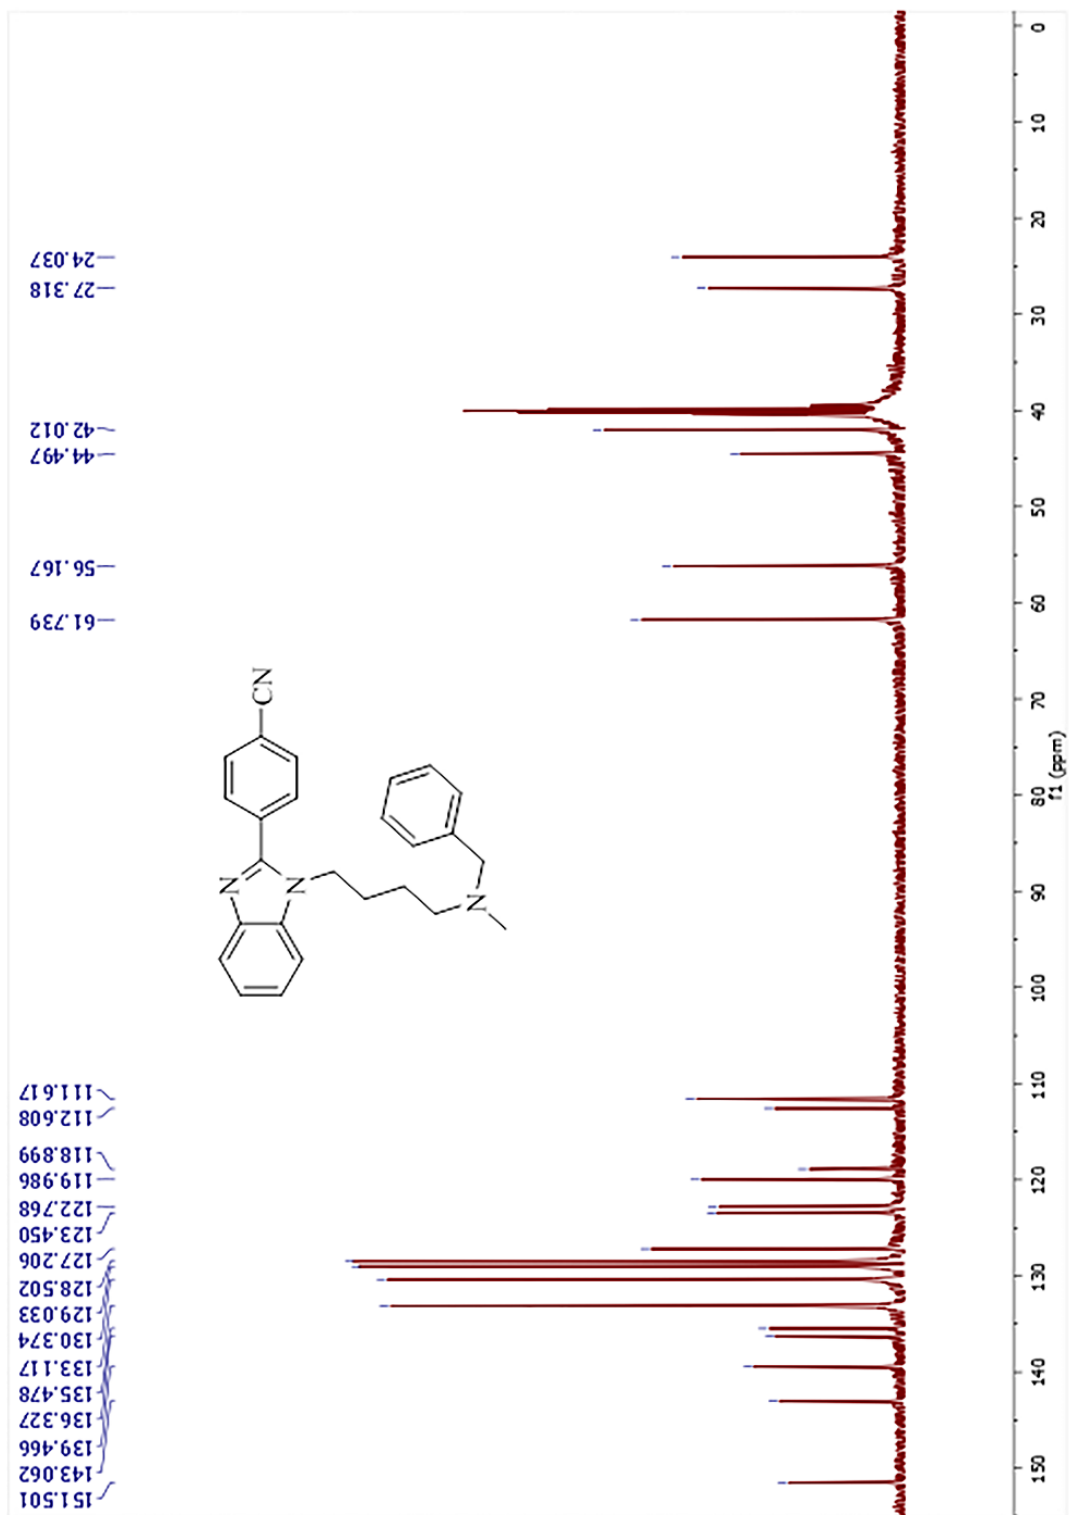

Figure 40. <sup>13</sup>C-NMR spectrum of compound (7k)

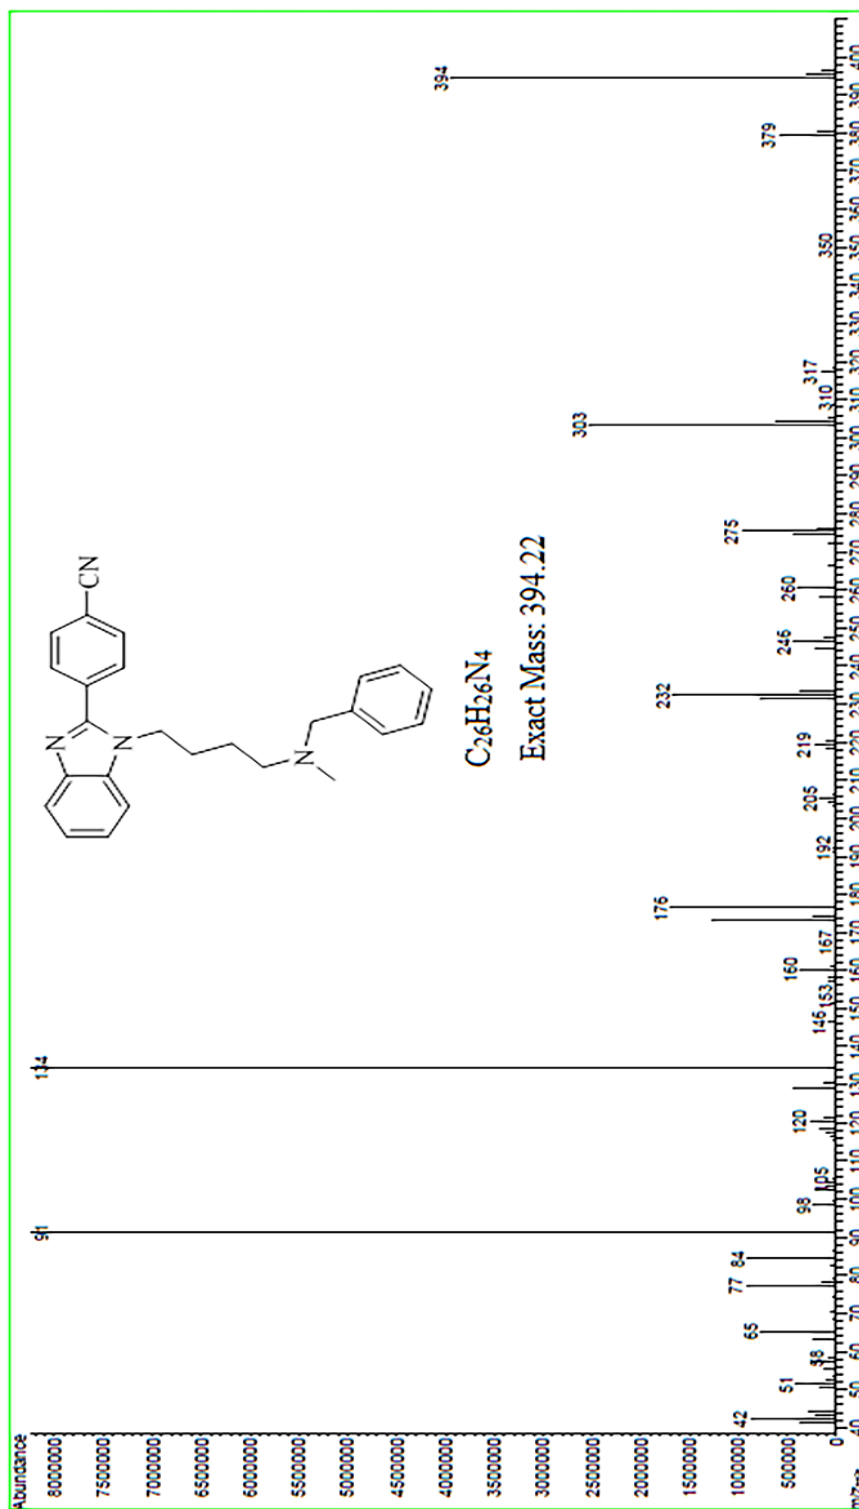

Figure 41. MASS spectrum of compound (7k)

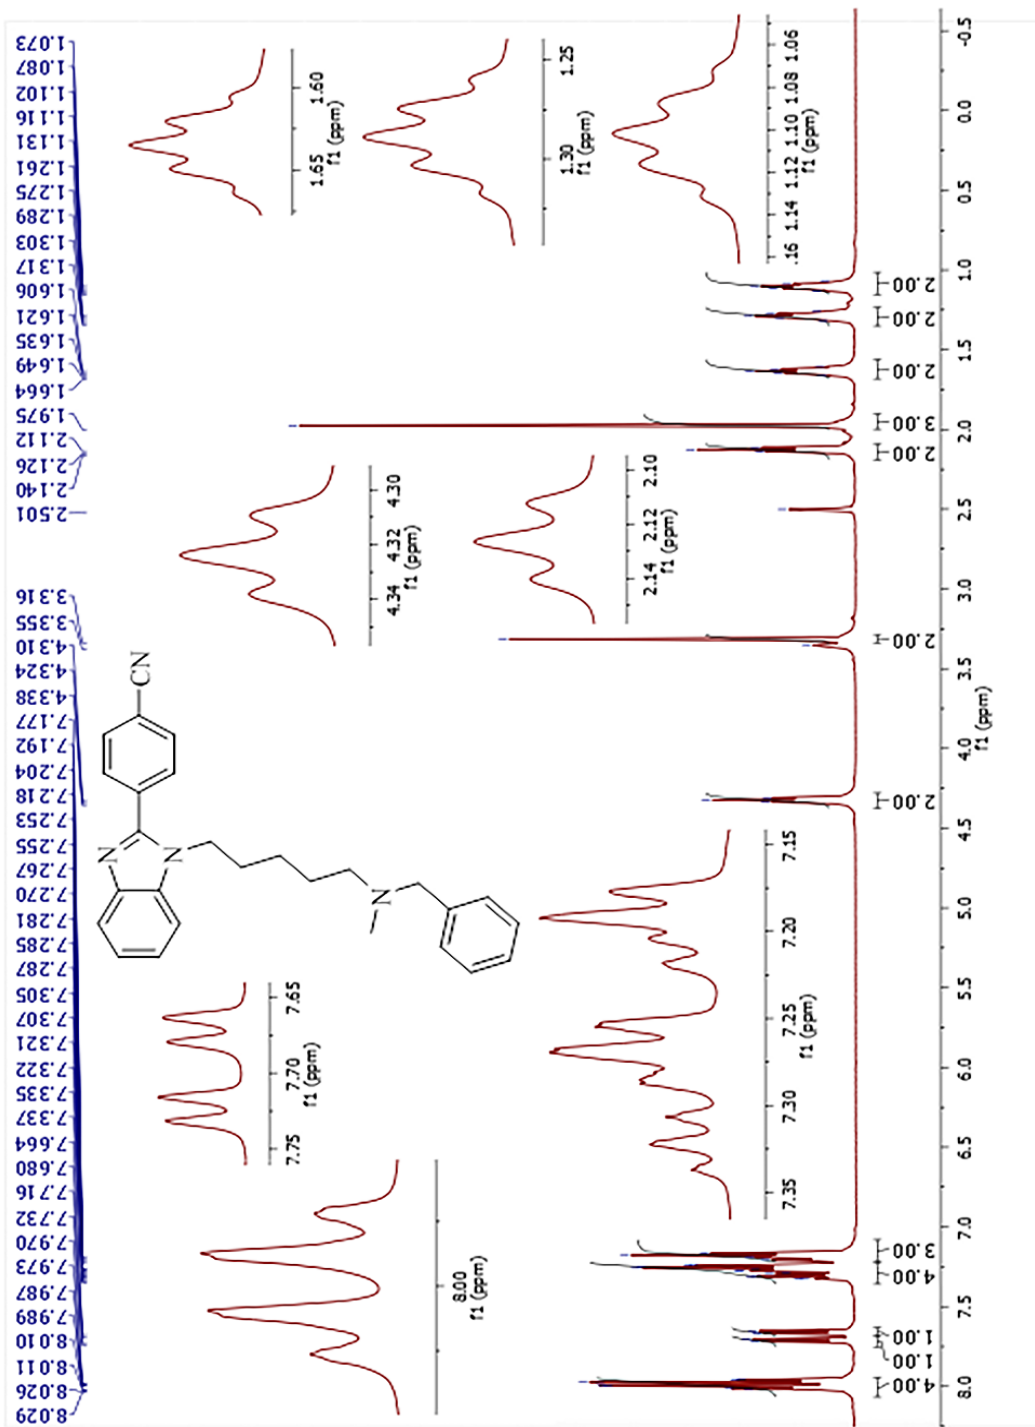

Figure 42. <sup>1</sup>H-NMR spectrum of compound (7I)

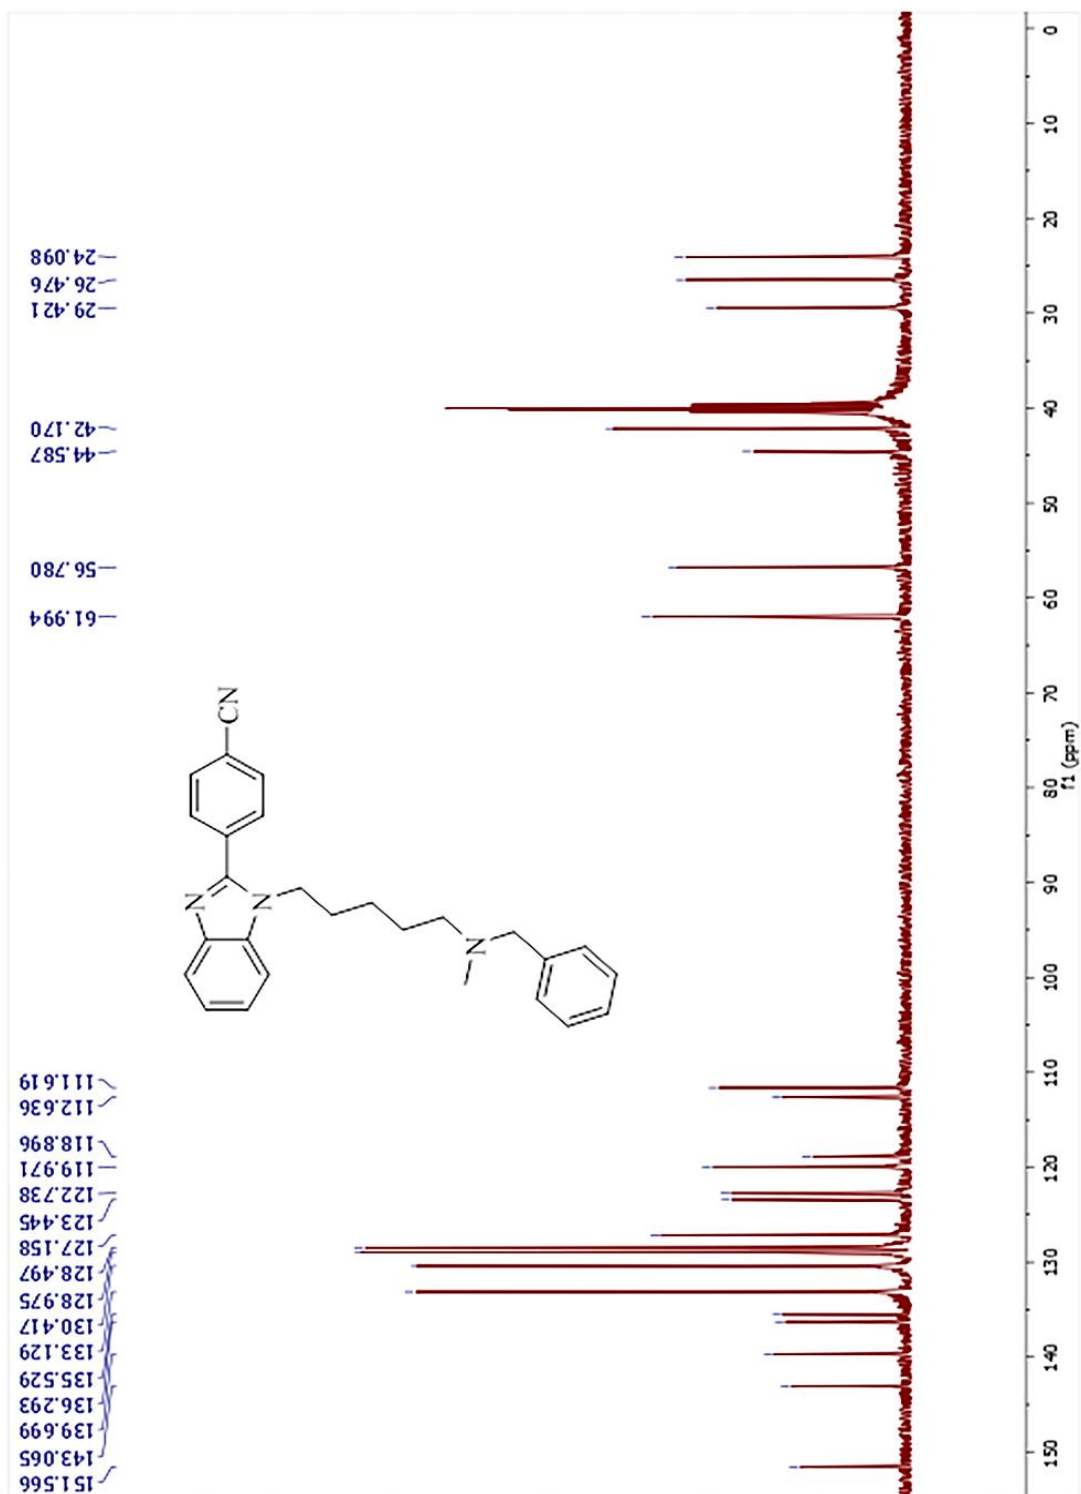

Figure 43.  $^{13}\text{C}$ -NMR spectrum of compound (71)



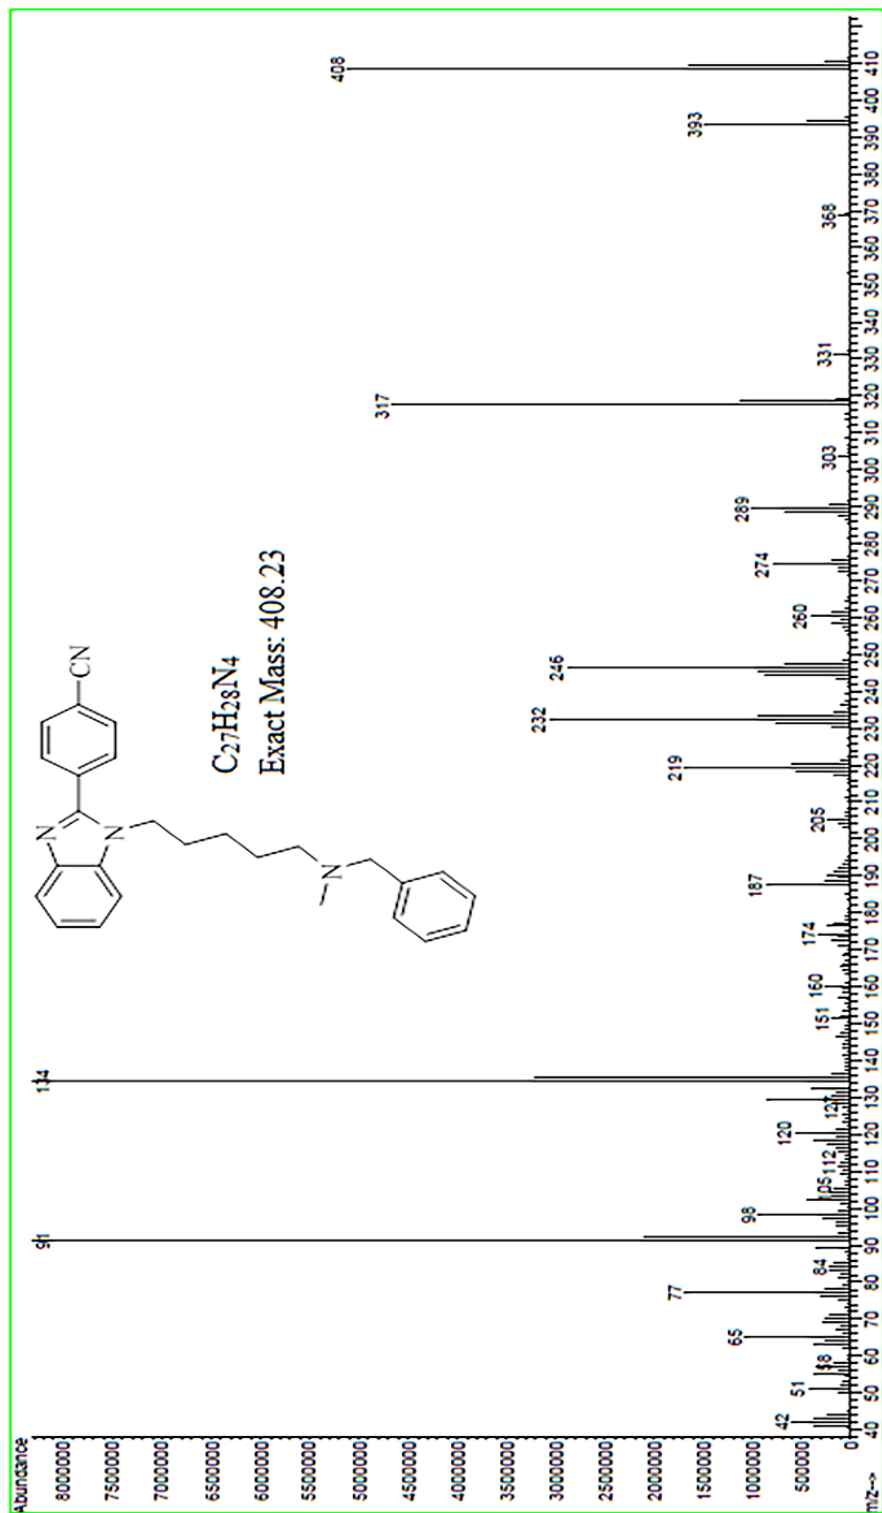

Figure 44. MASS spectrum of compound (71)

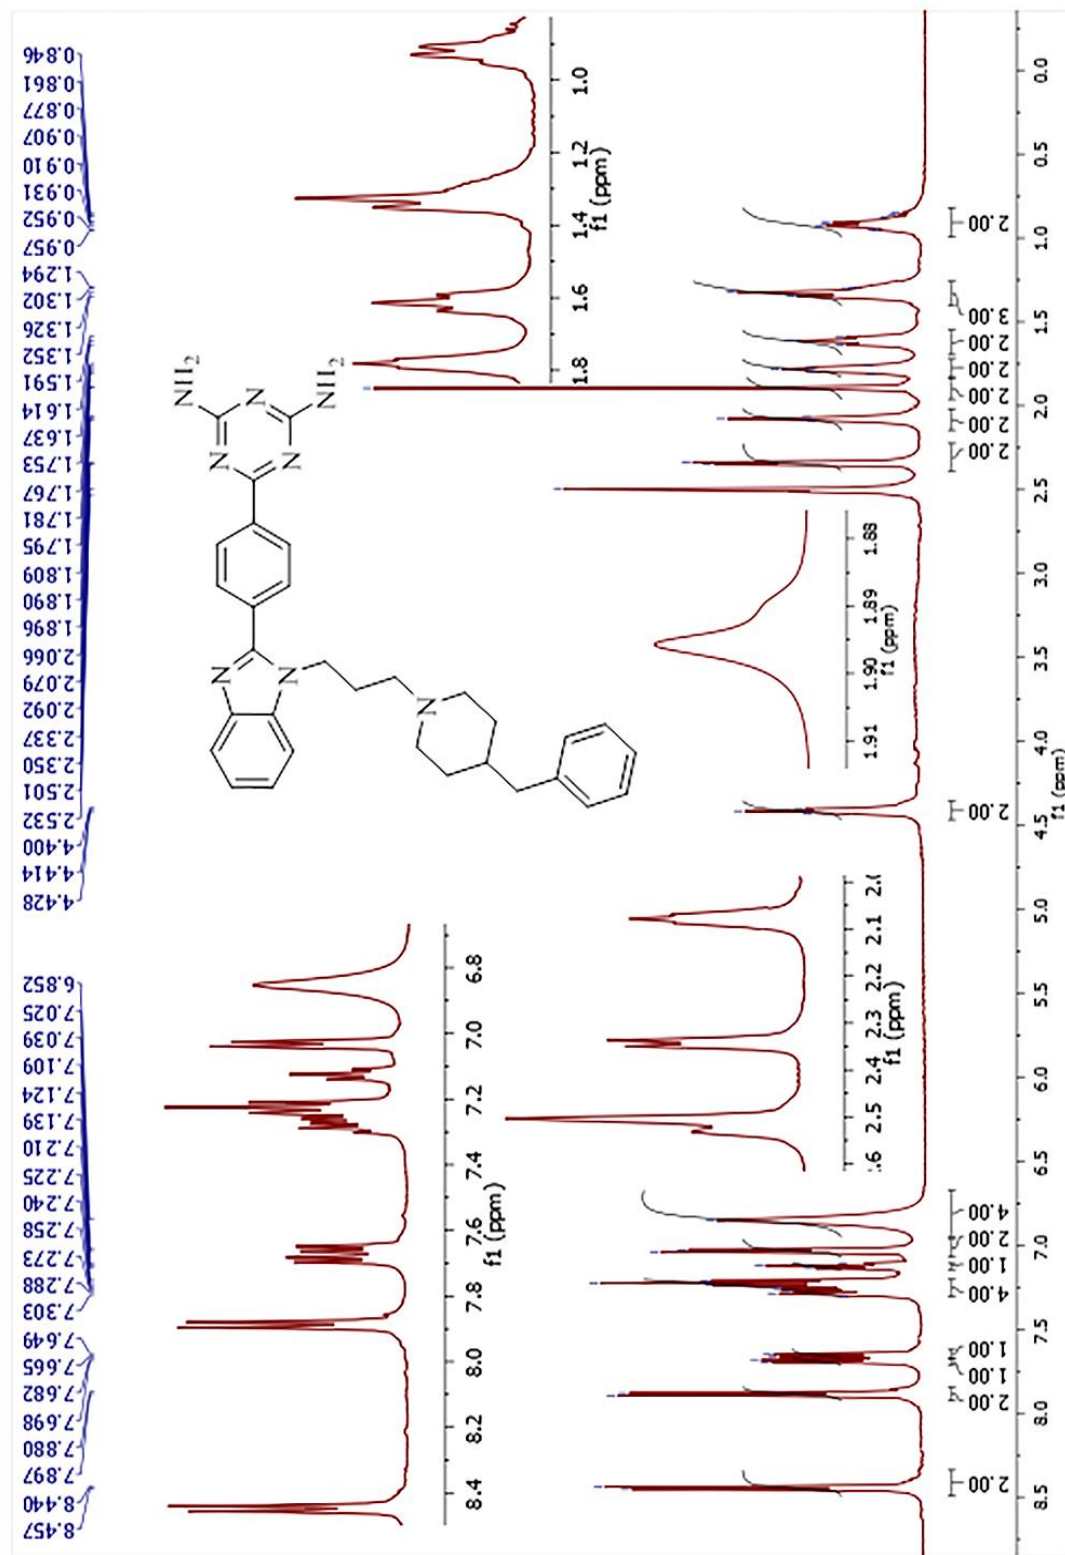

Figure 45. <sup>1</sup>H-NMR spectrum of compound (9a)

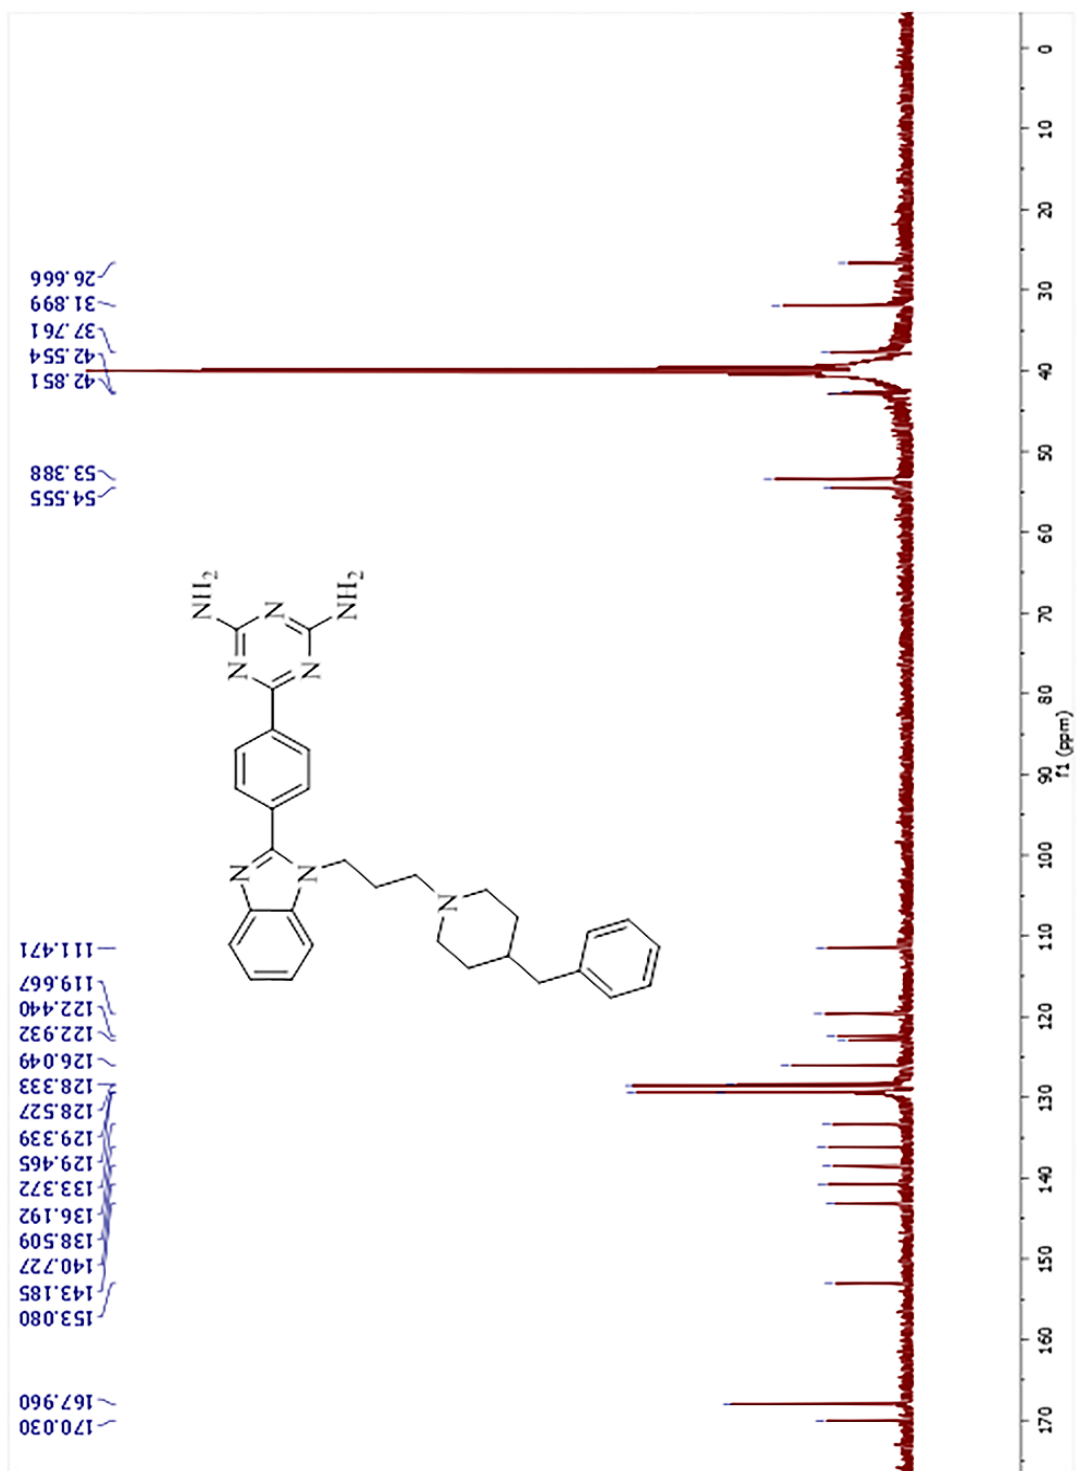

Figure 46.  $^{13}\text{C}$ -NMR spectrum of compound (9a)

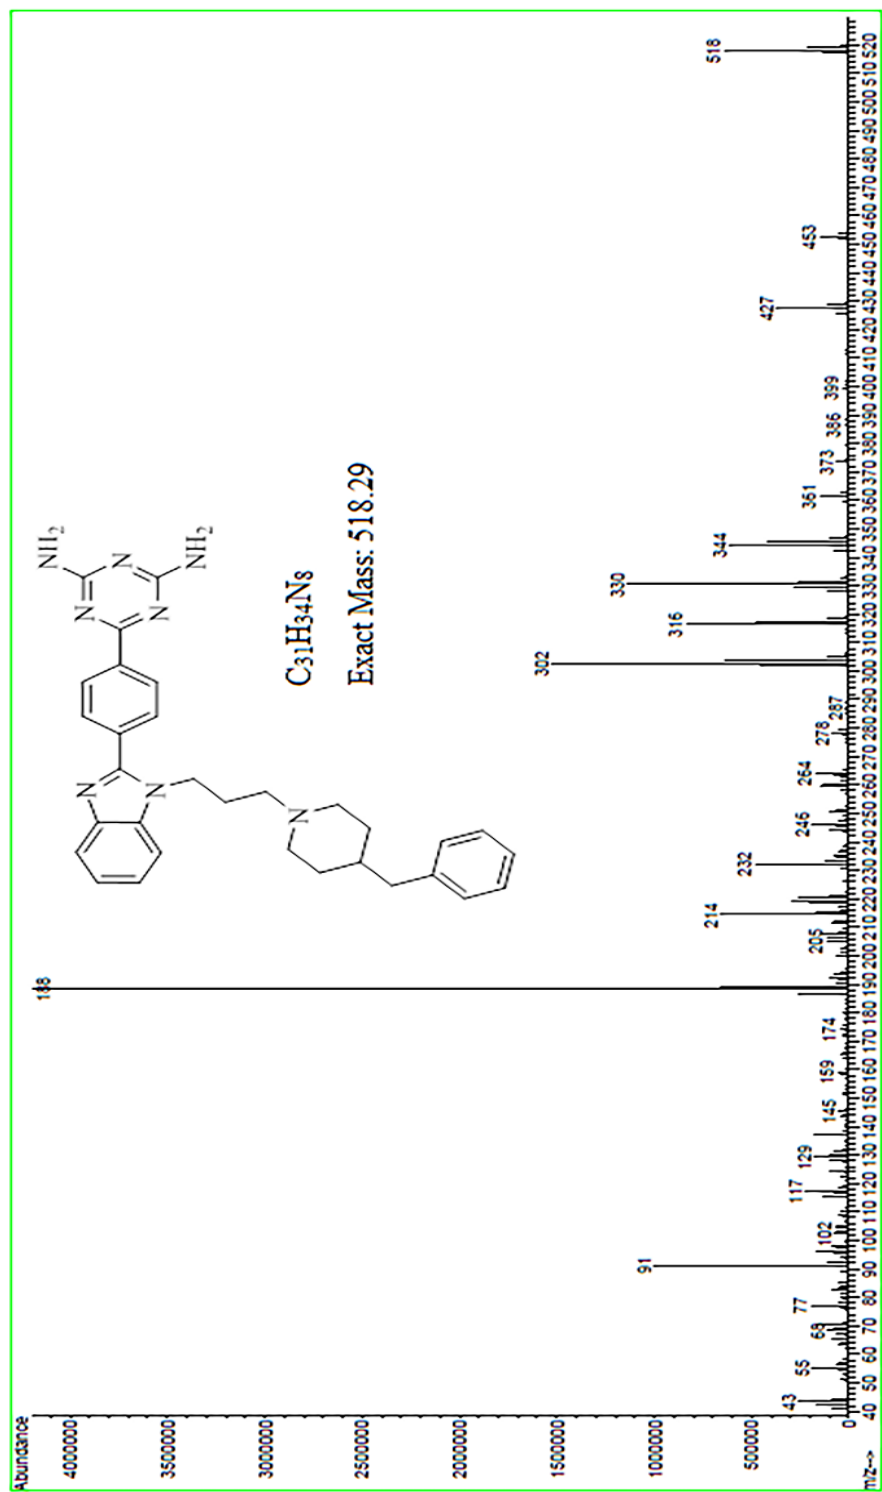

Figure 47. MASS spectrum of compound (9a)

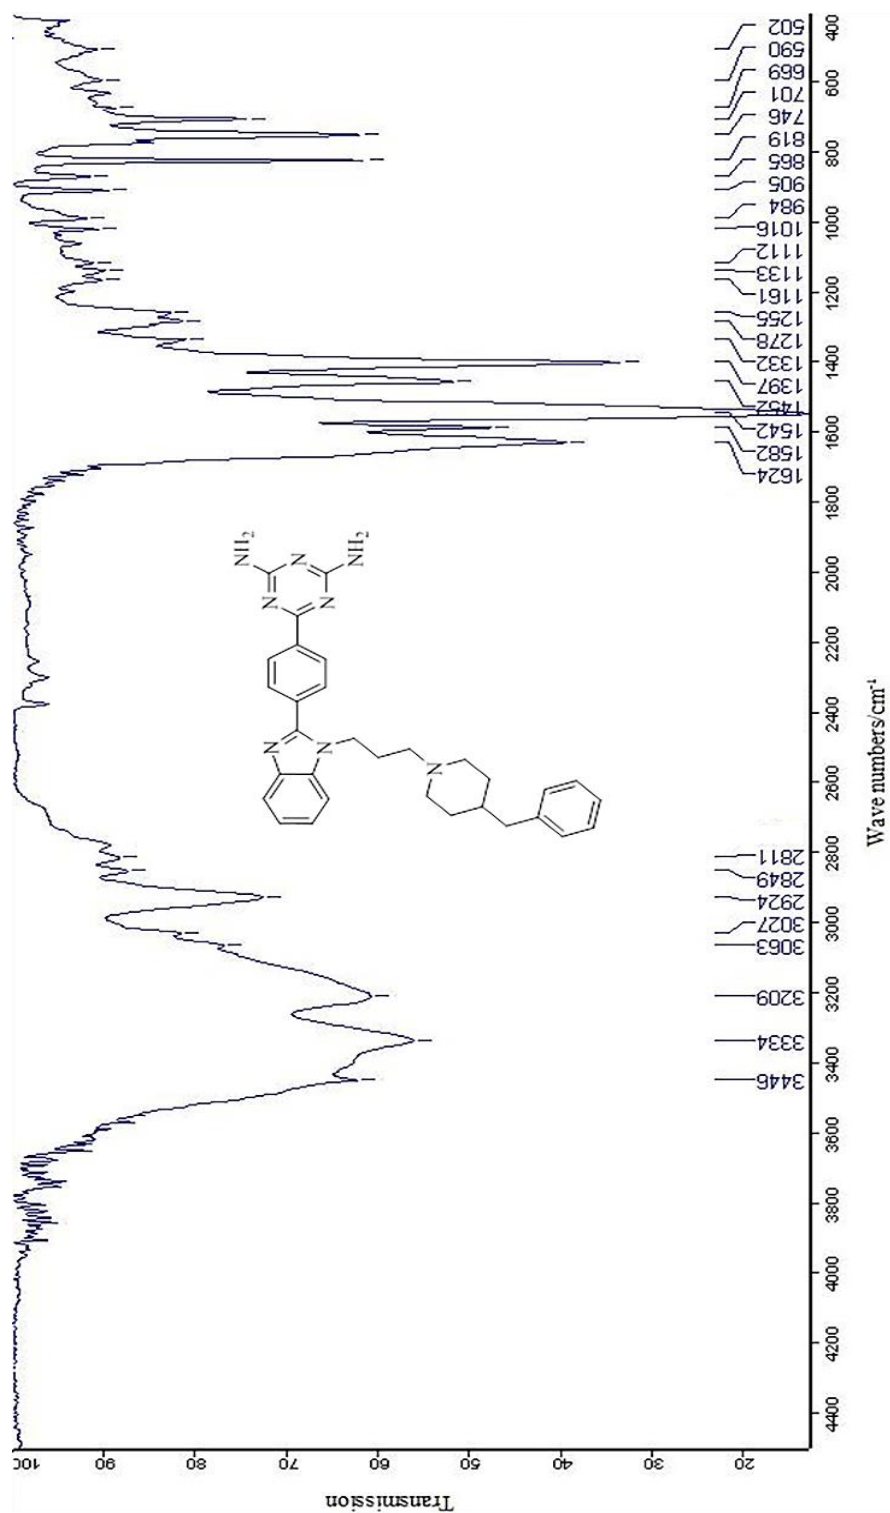

Figure 48. IR spectrum of compound (9a)

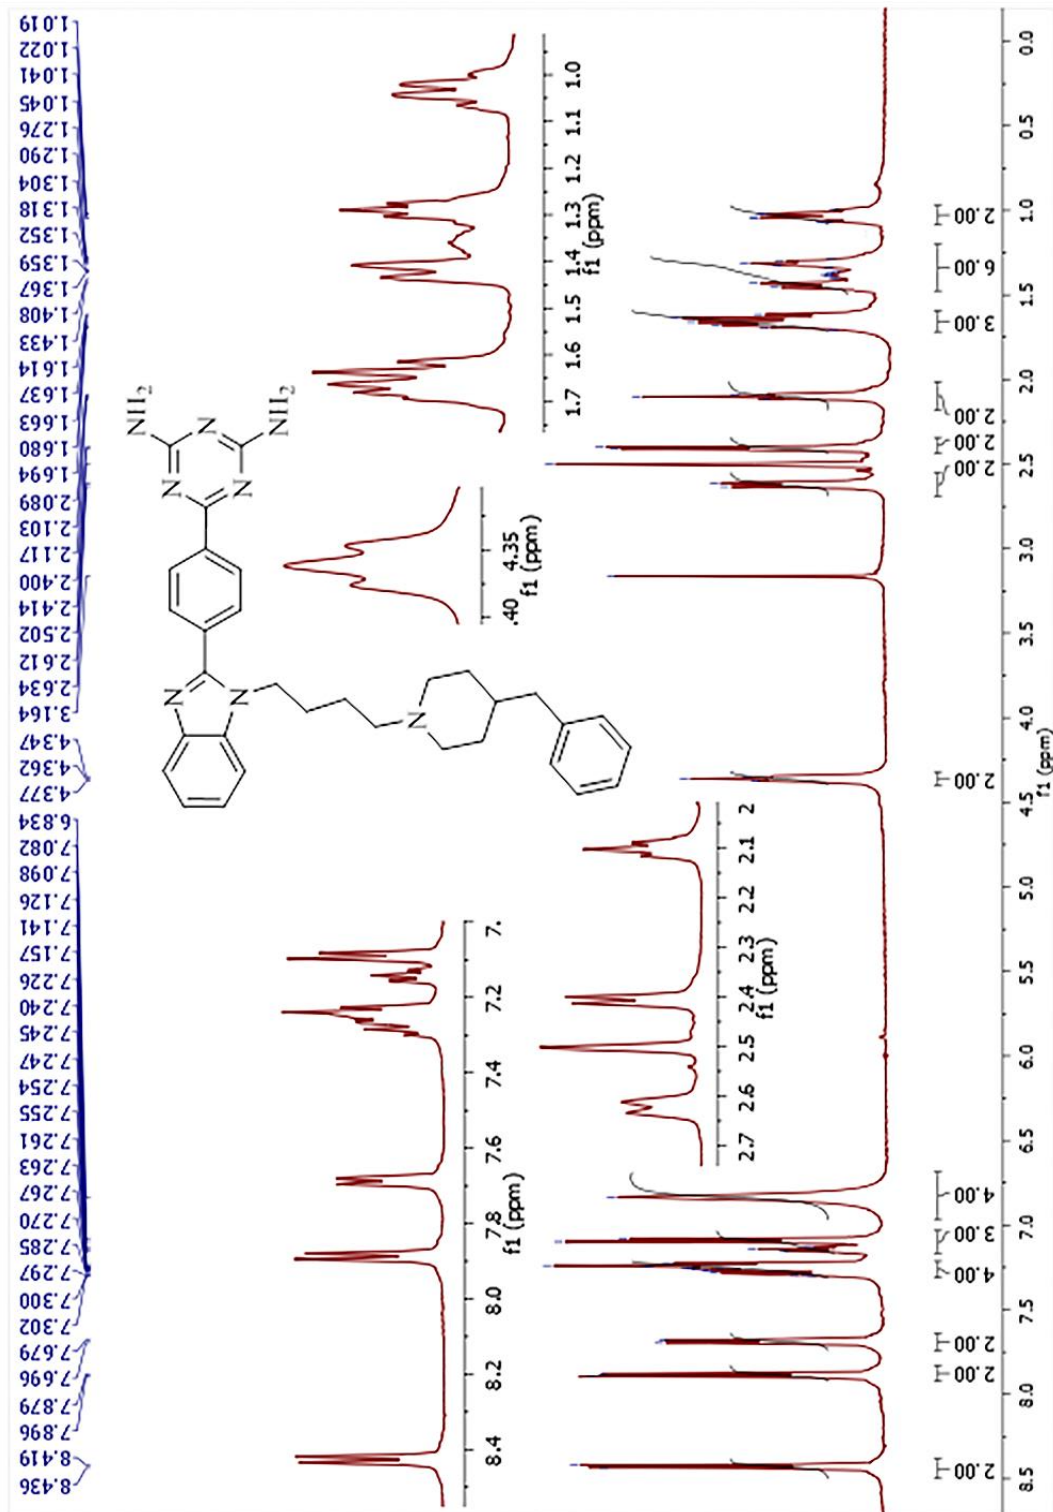

Figure 49. <sup>1</sup>H-NMR spectrum of compound (9b)

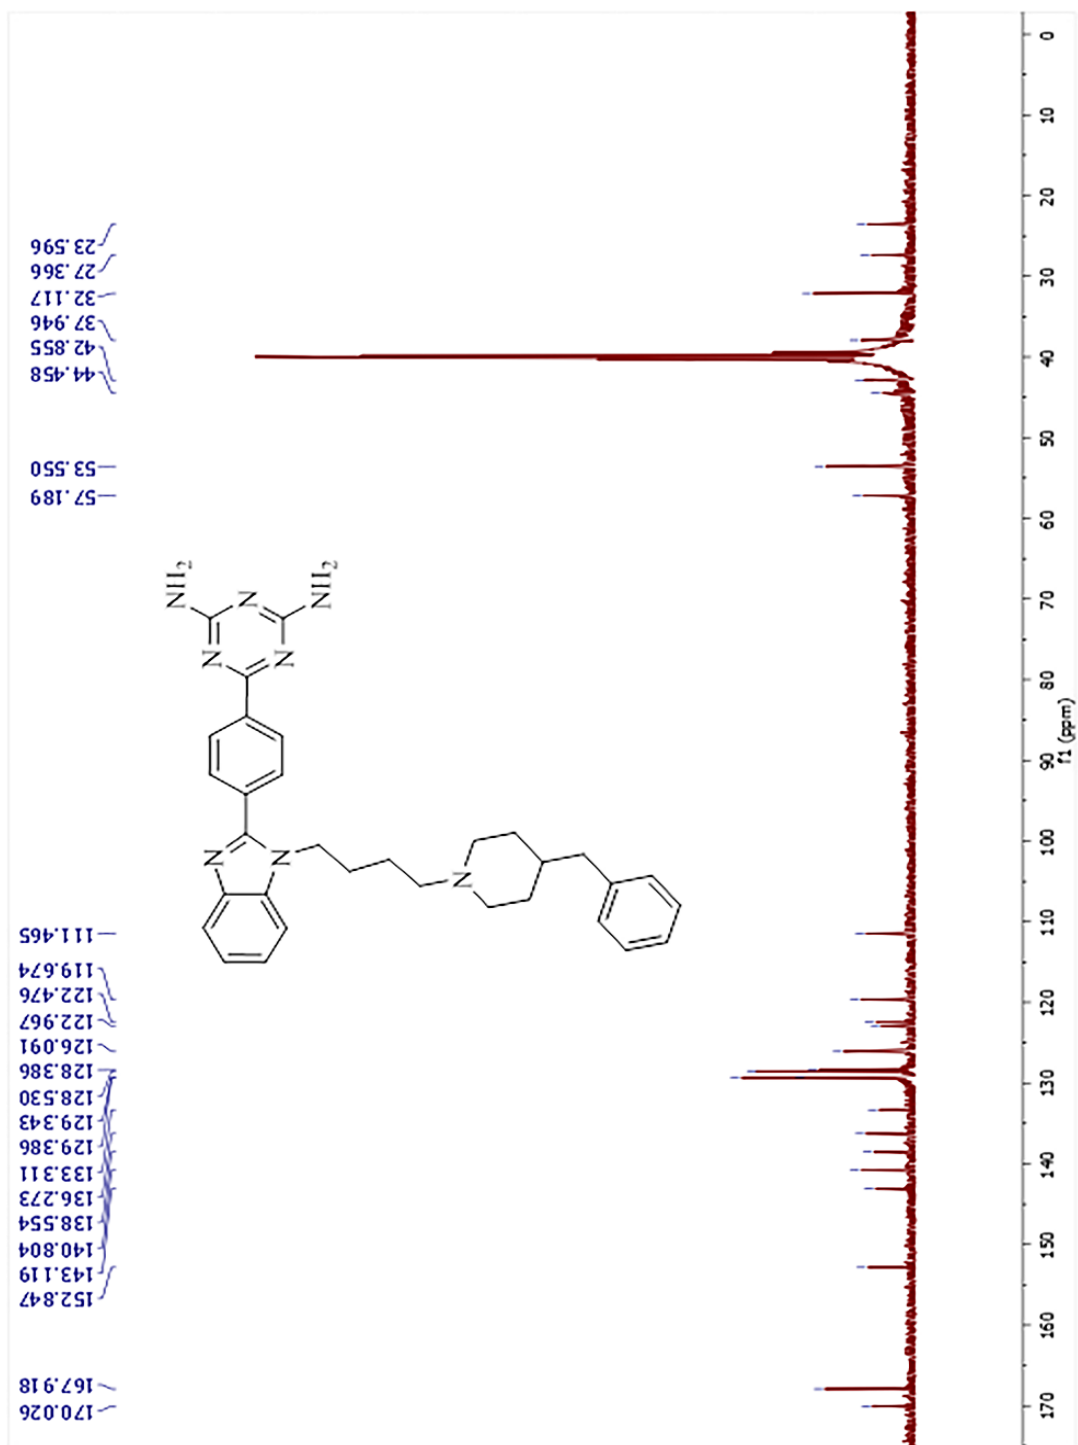

Figure 50.  $^{13}\text{C}$ -NMR spectrum of compound (9b)

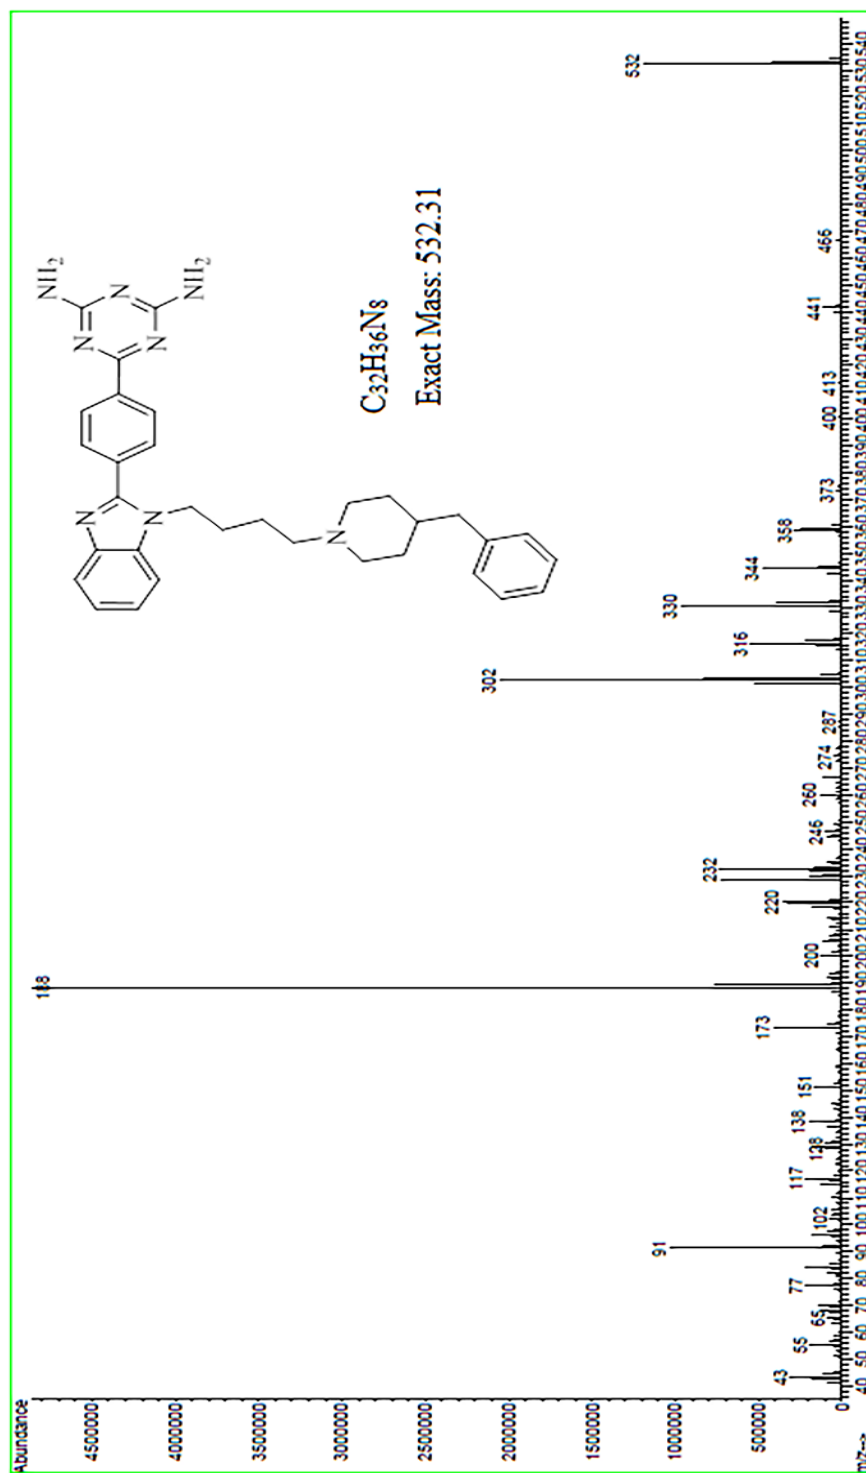

Figure 51. MASS spectrum of compound (9b)



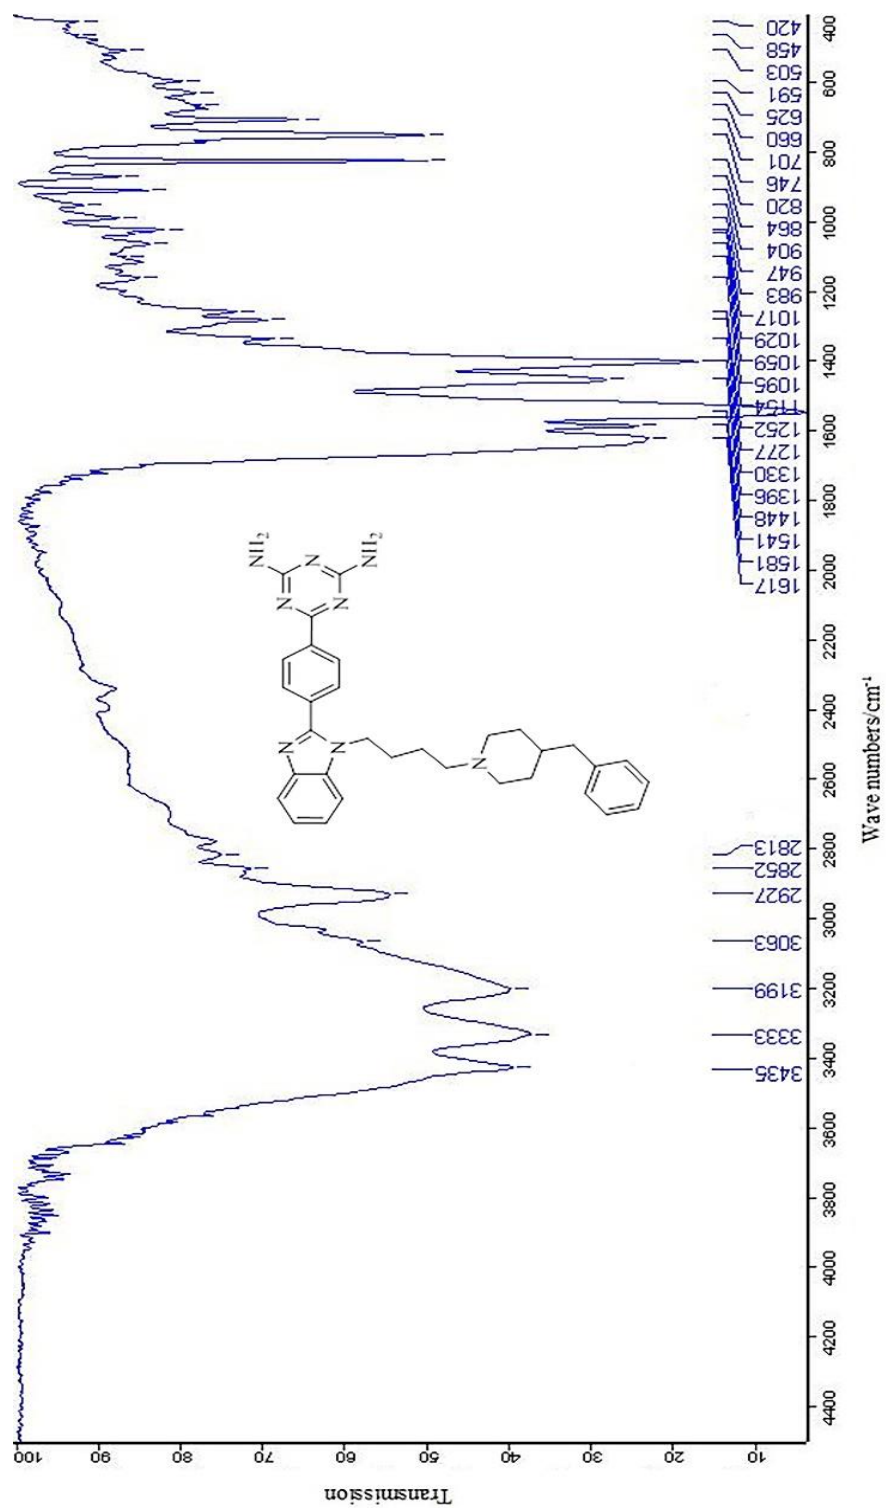

Figure 52. IR spectrum of compound (9b)

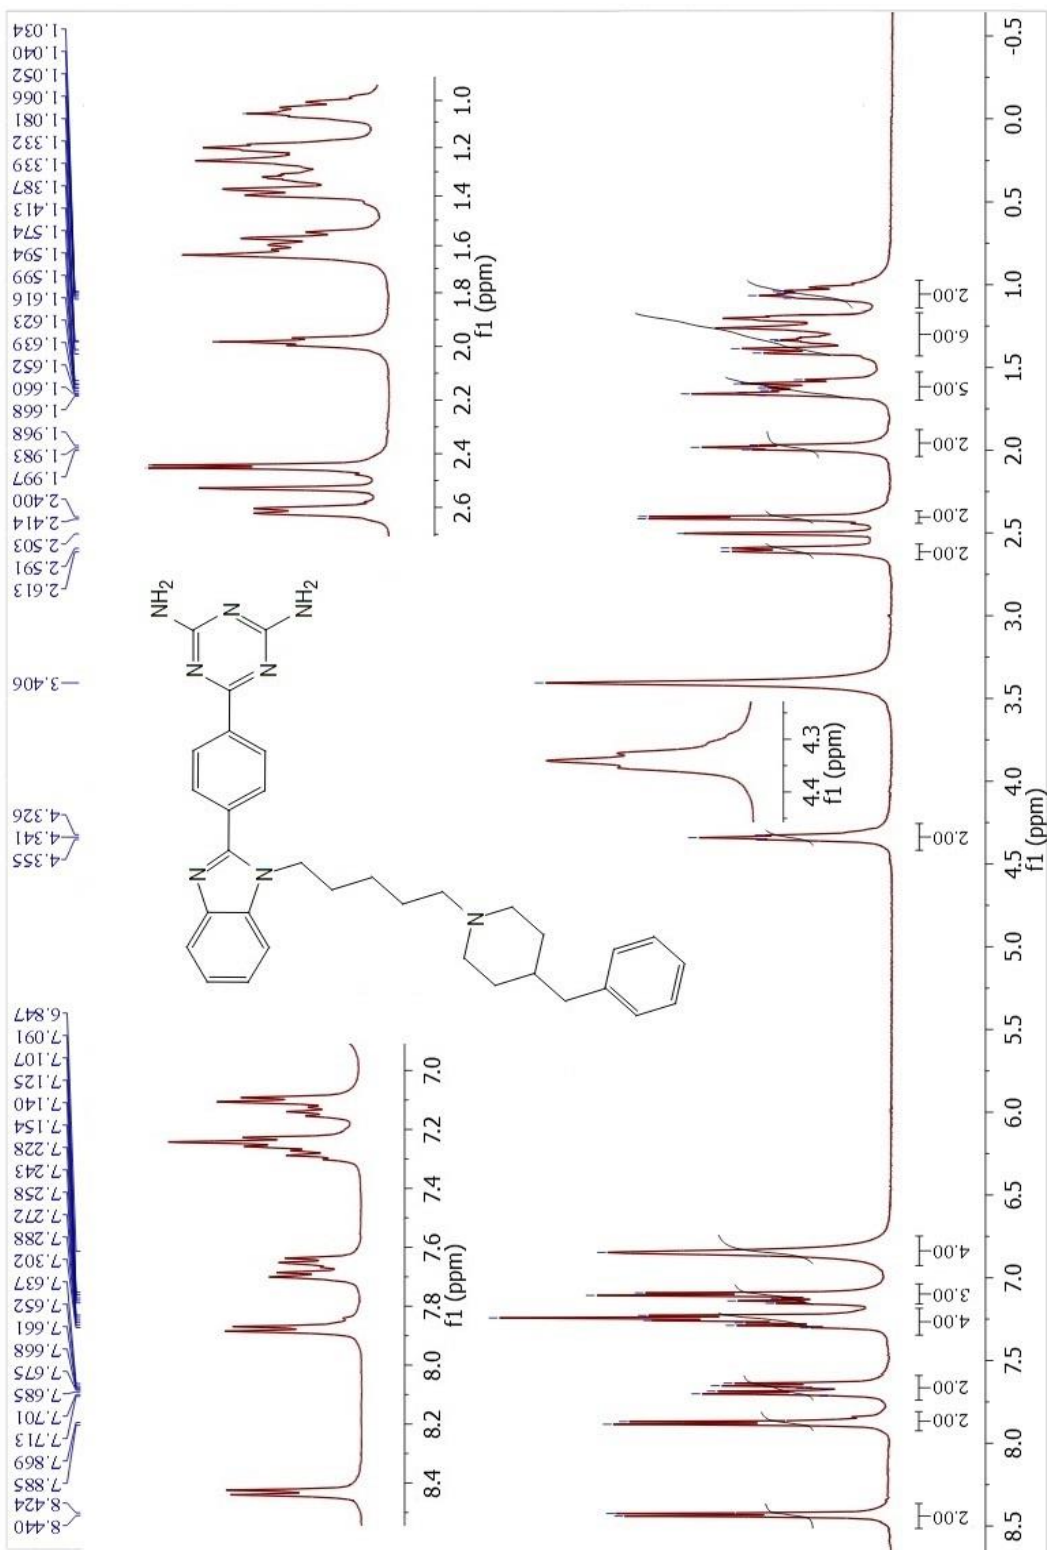

Figure 53.  $^1\text{H-NMR}$  spectrum of compound (9c)

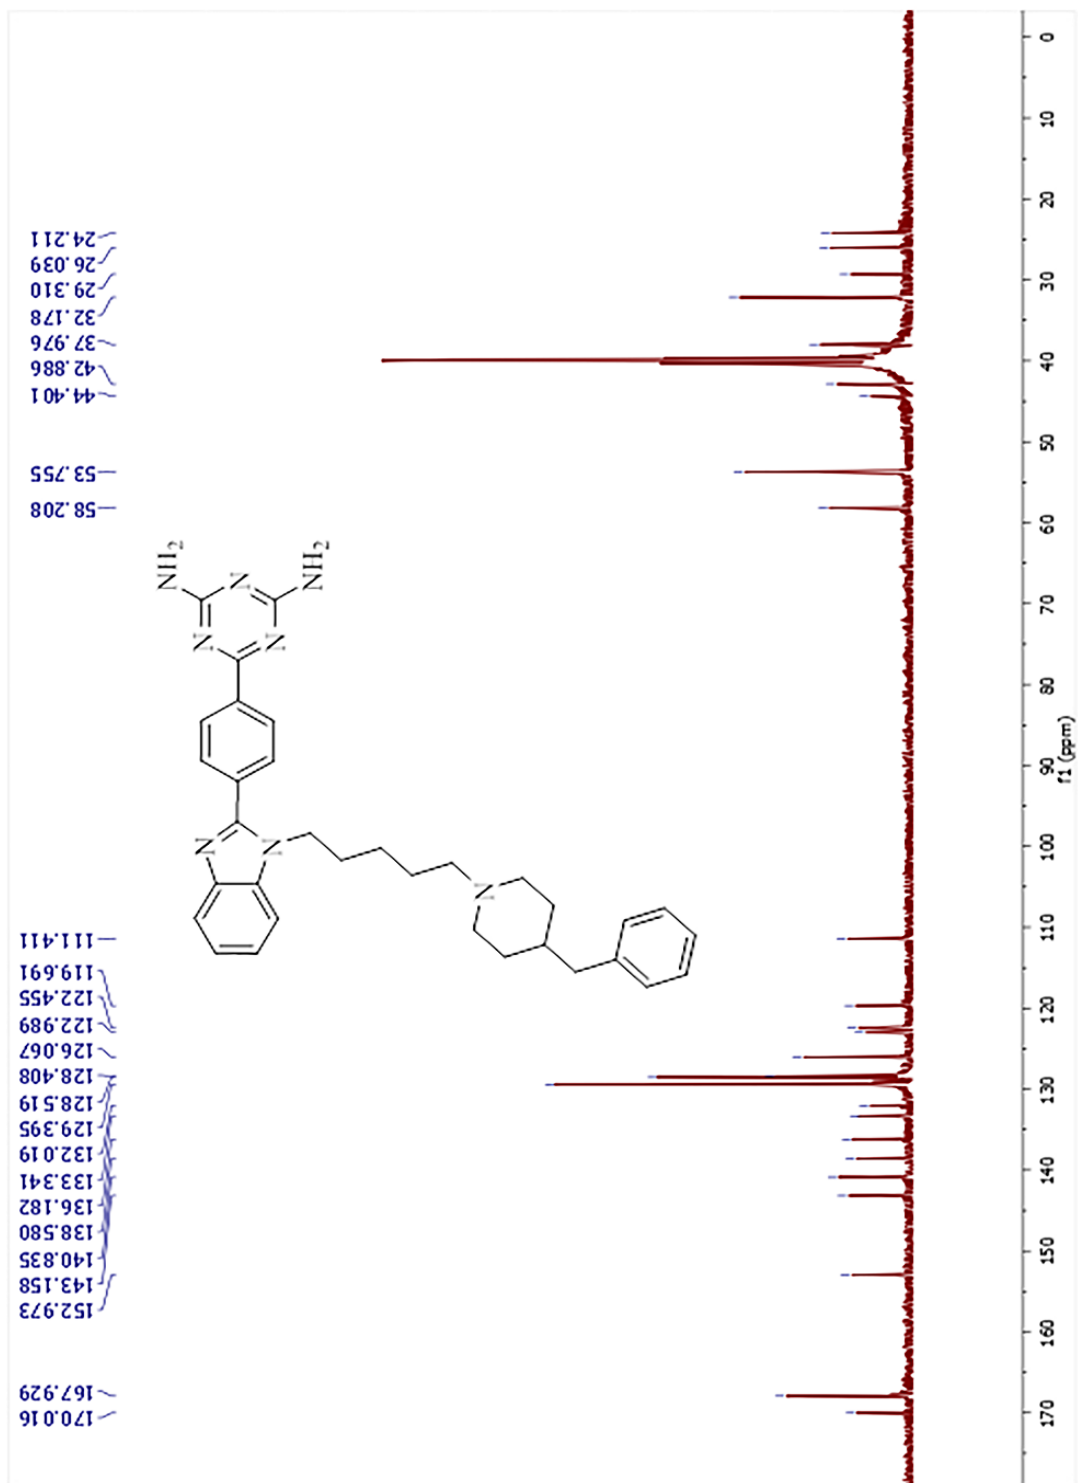

Figure 54.  $^{13}\text{C}$ -NMR spectrum of compound (9c)

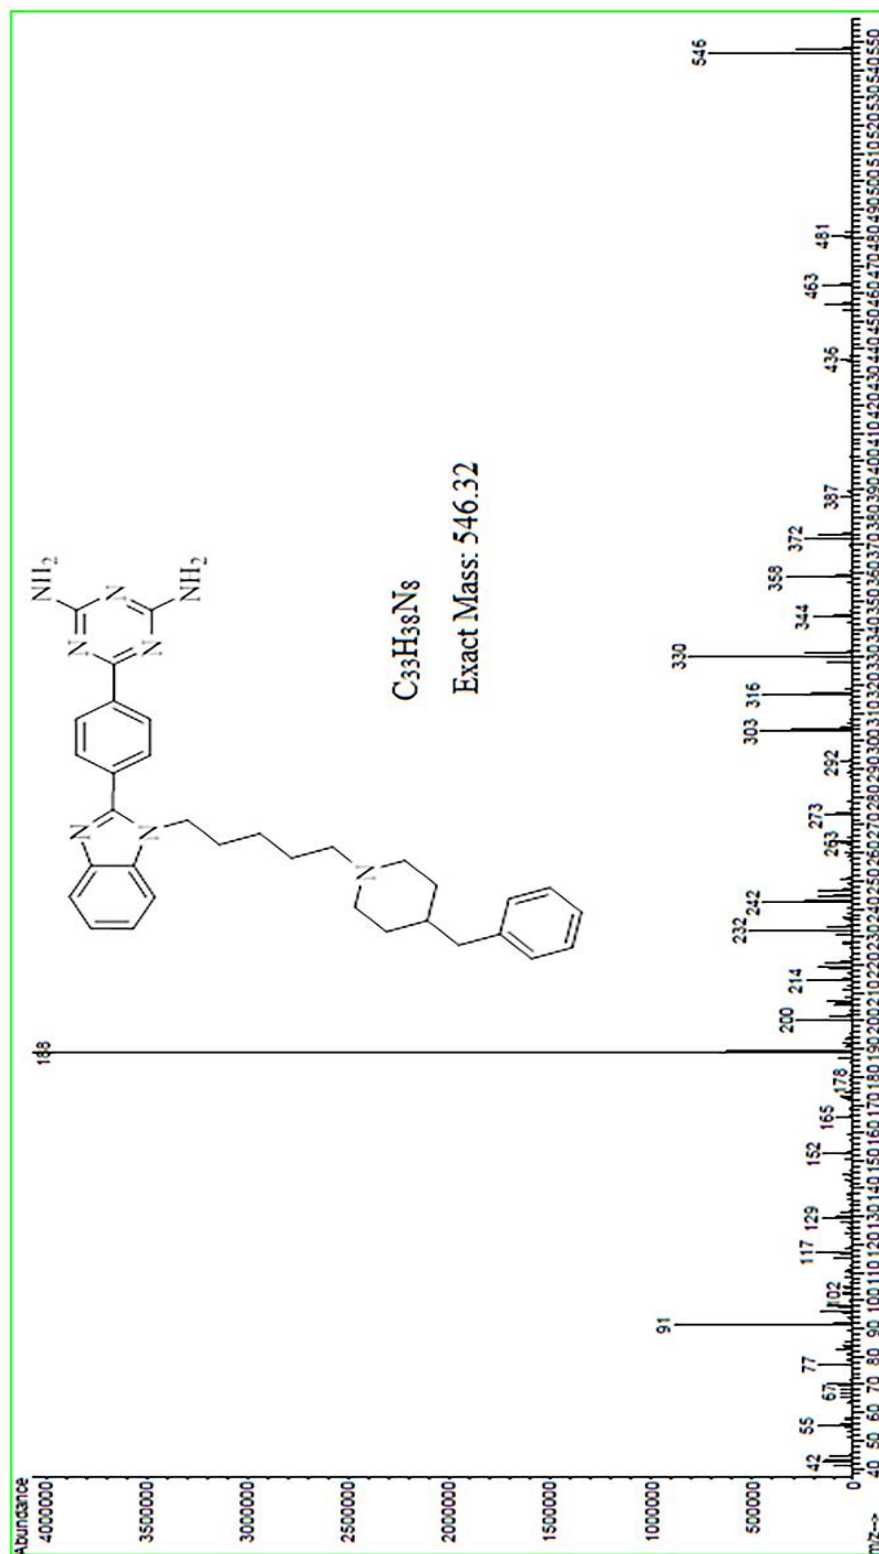

Figure 55. MASS spectrum of compound (9c)

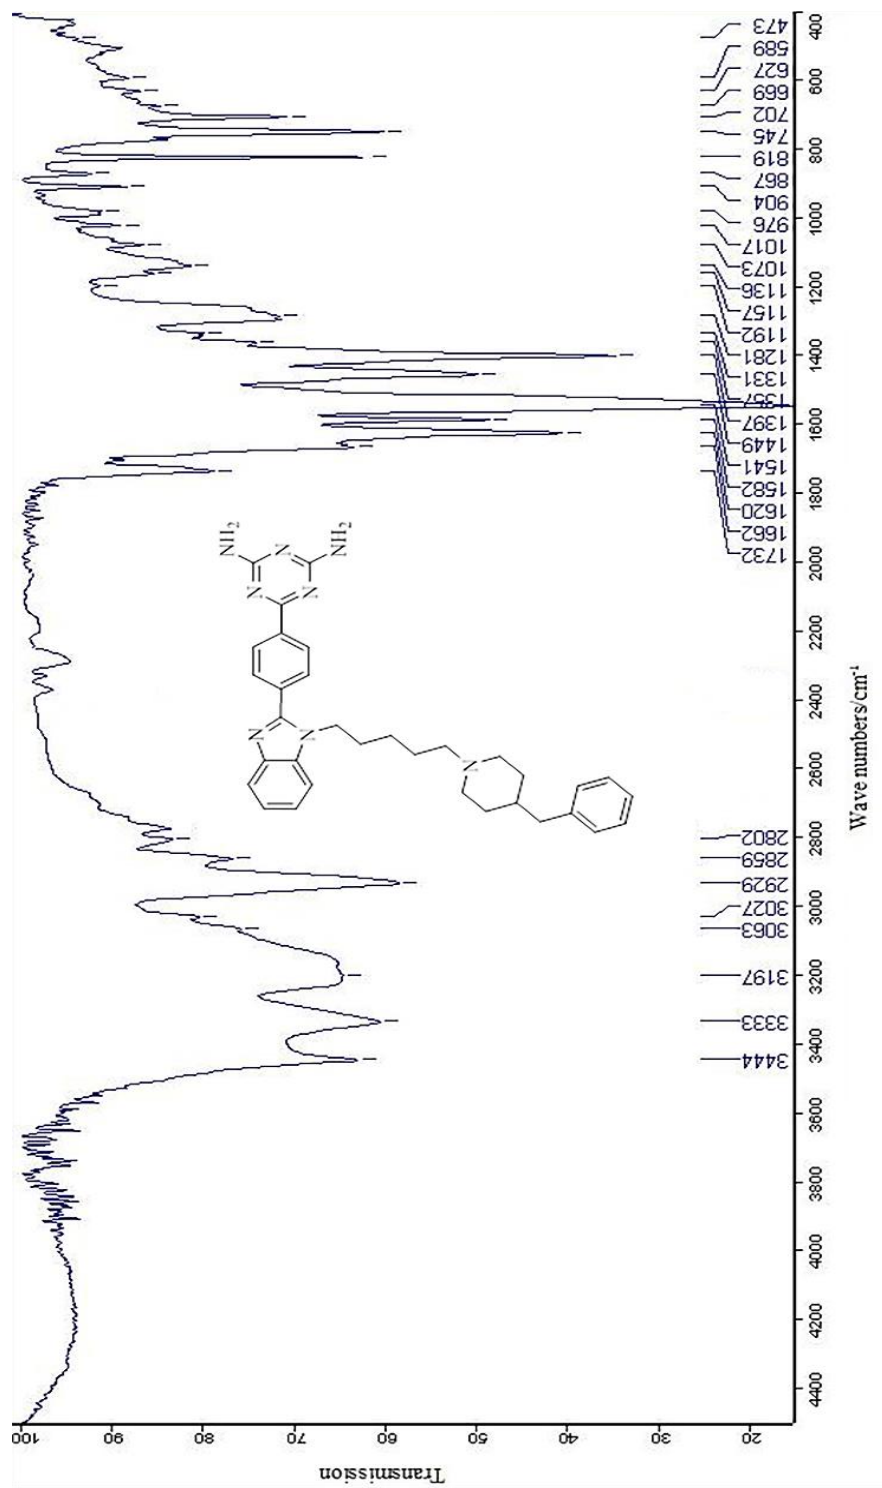

Figure 56. IR spectrum of compound (9c)

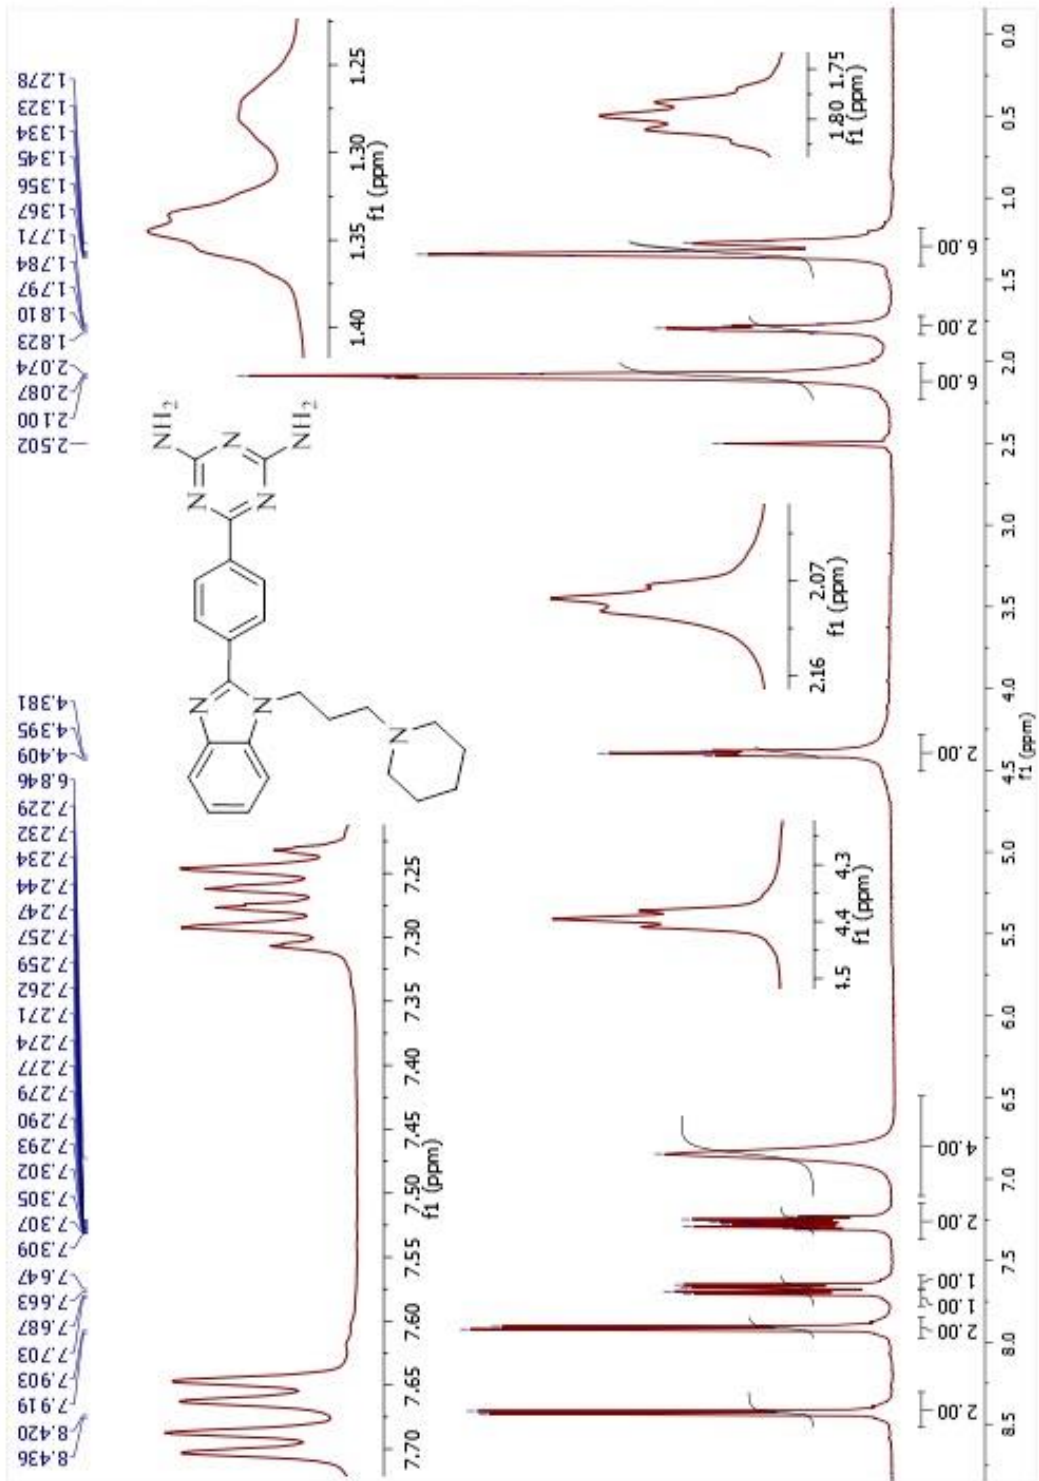

Figure 57. <sup>1</sup>H-NMR spectrum of compound (9d)

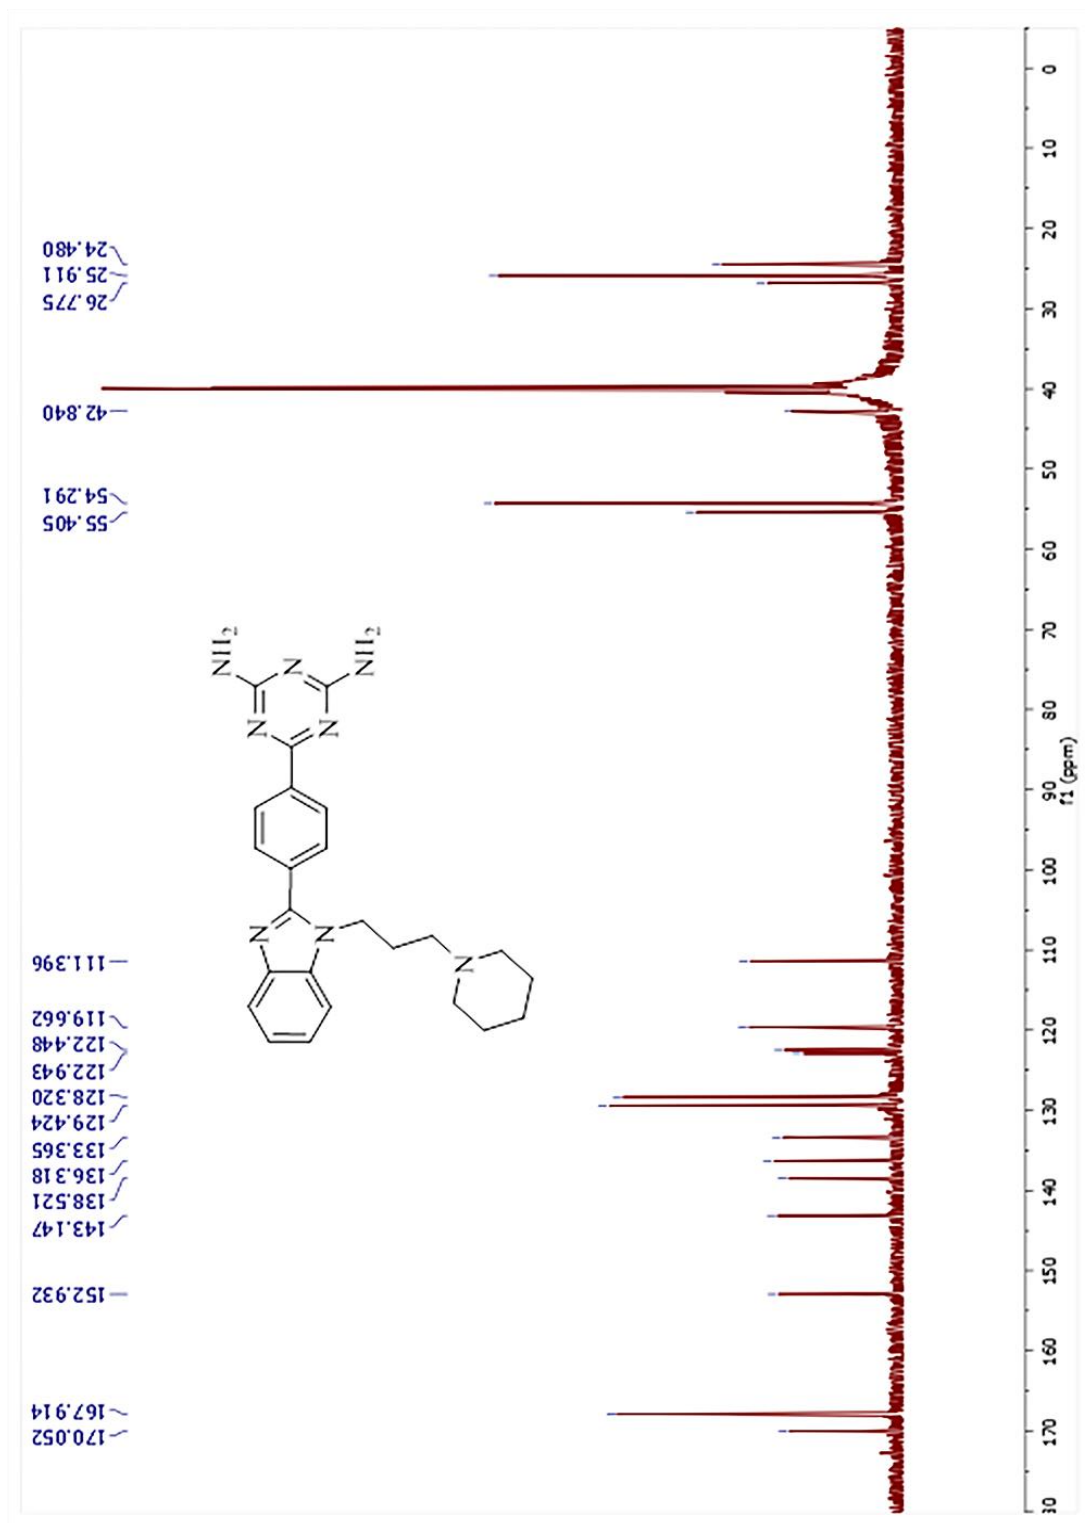

Figure 58.  $^{13}\text{C}$ -NMR spectrum of compound (9d)

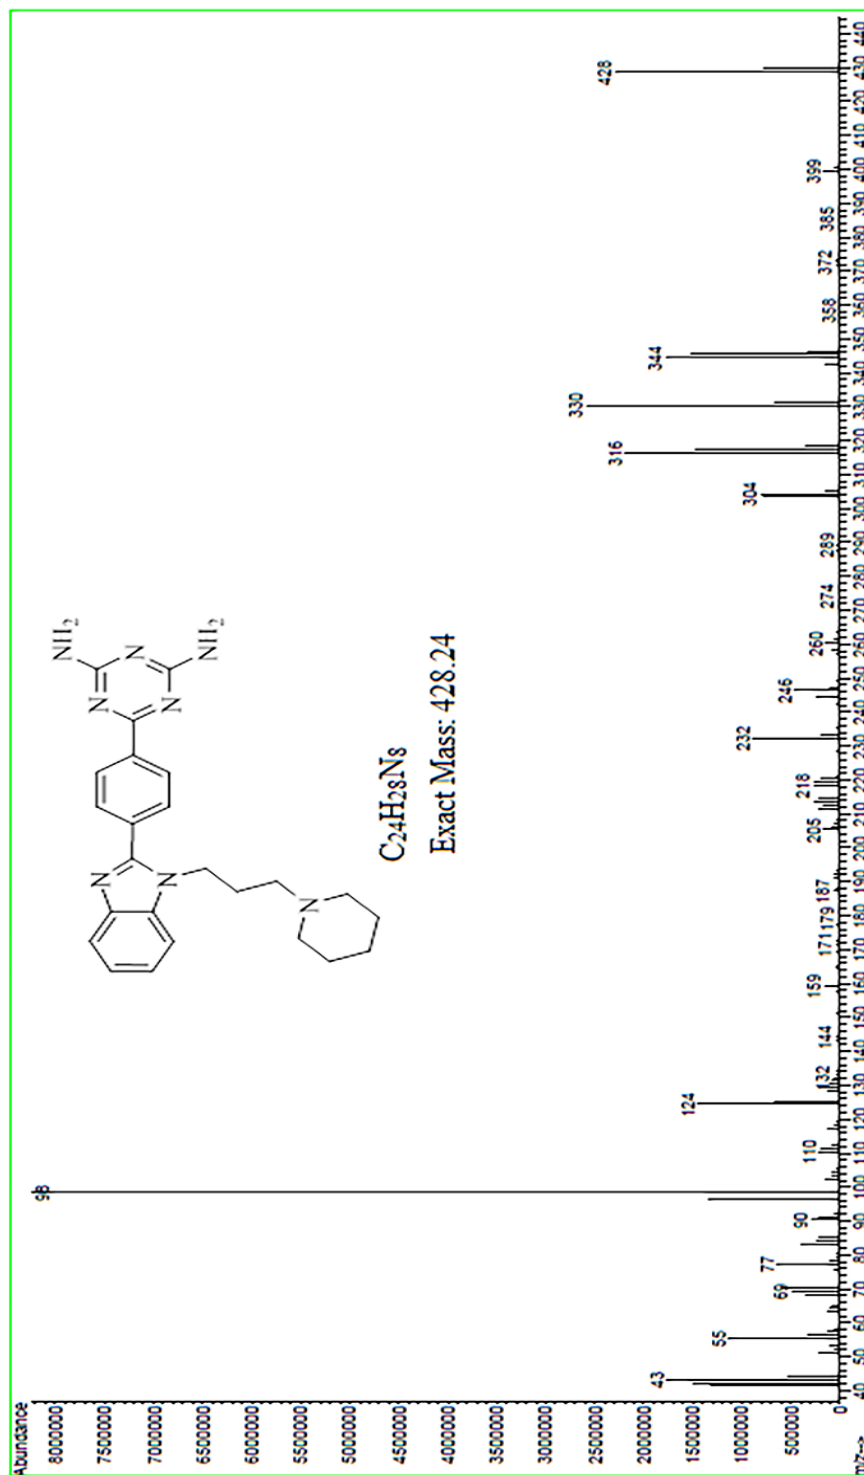

Figure 59. MASS spectrum of compound (9d)



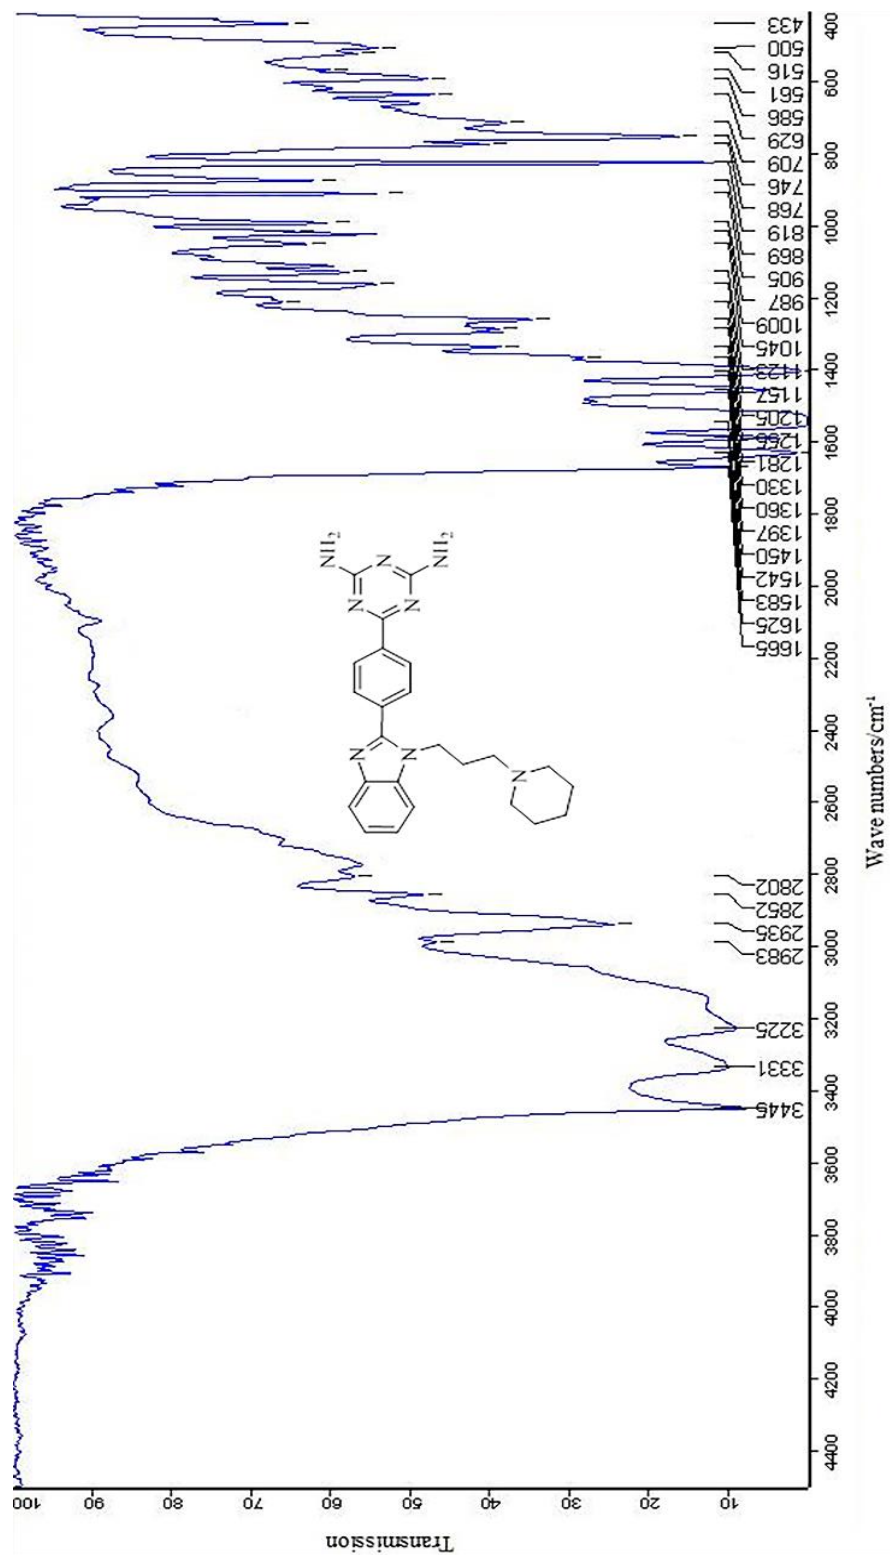

Figure 60. IR spectrum of compound (9d)

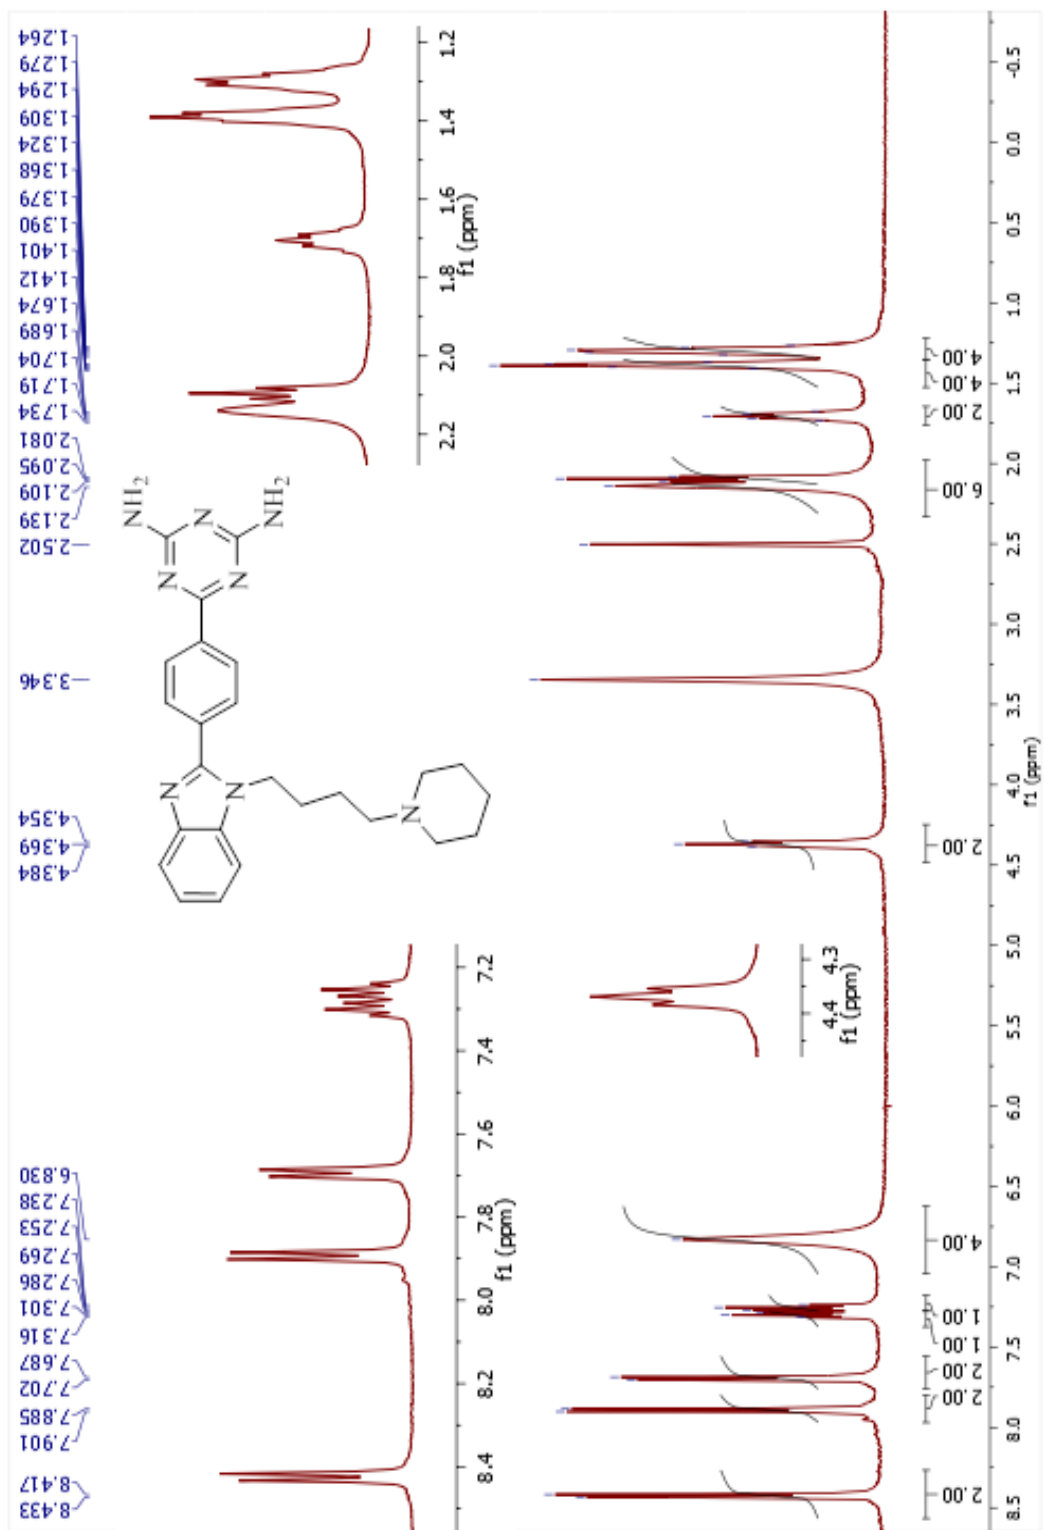

Figure 61. <sup>1</sup>H-NMR spectrum of compound (9e)

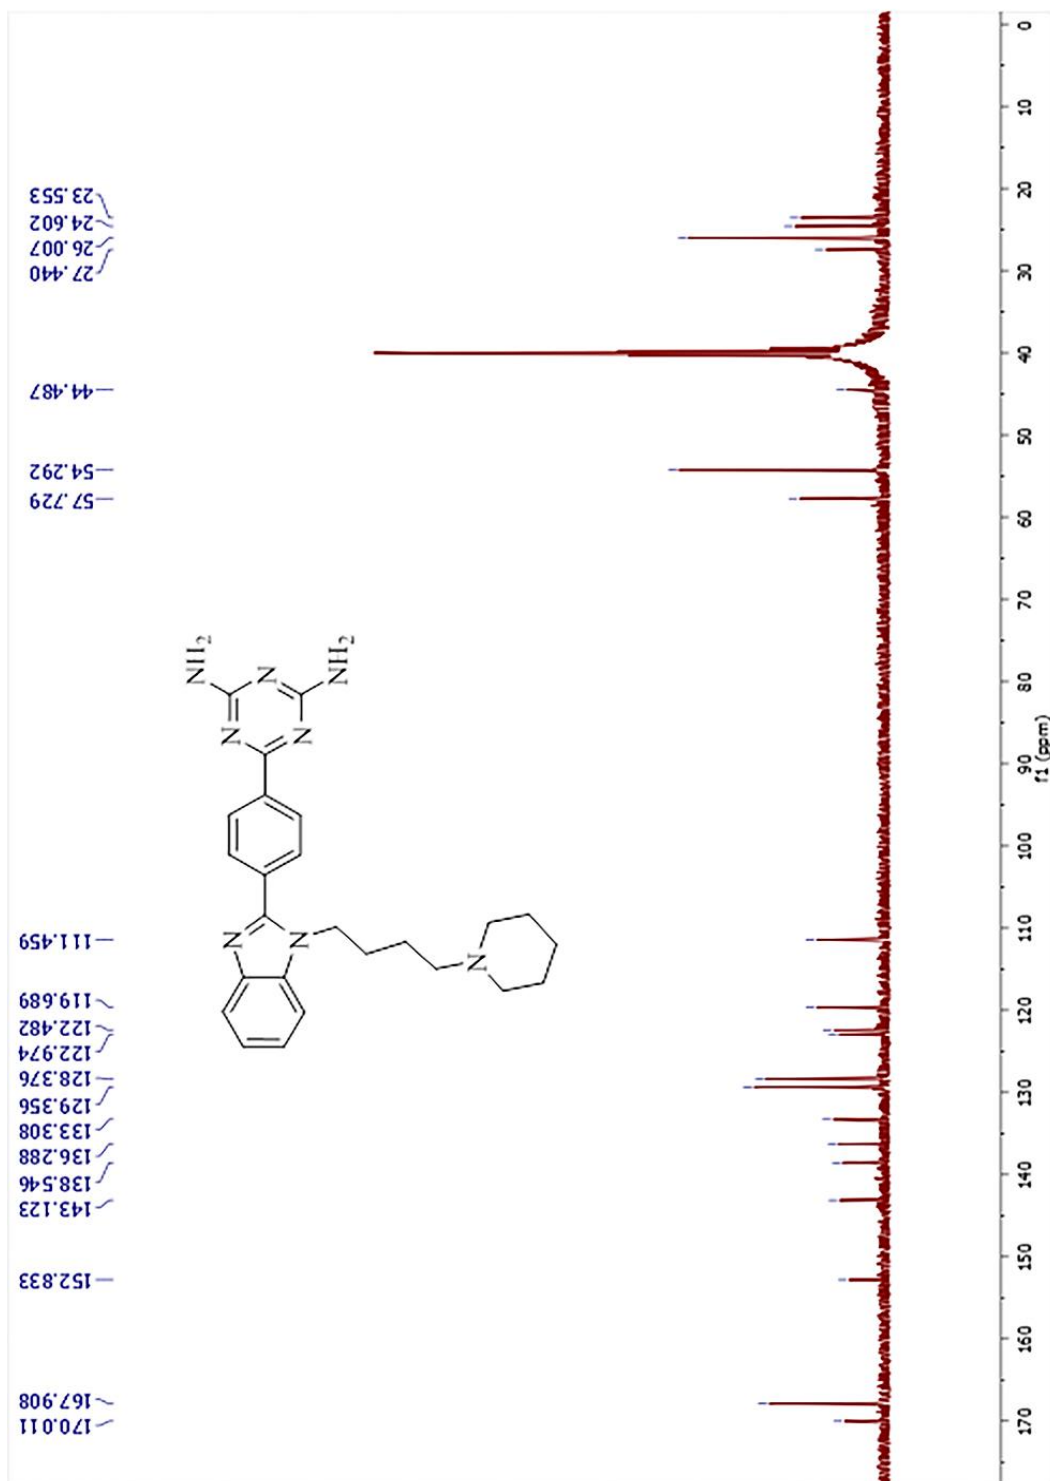

Figure 62.  $^{13}\text{C}$ -NMR spectrum of compound (9e)

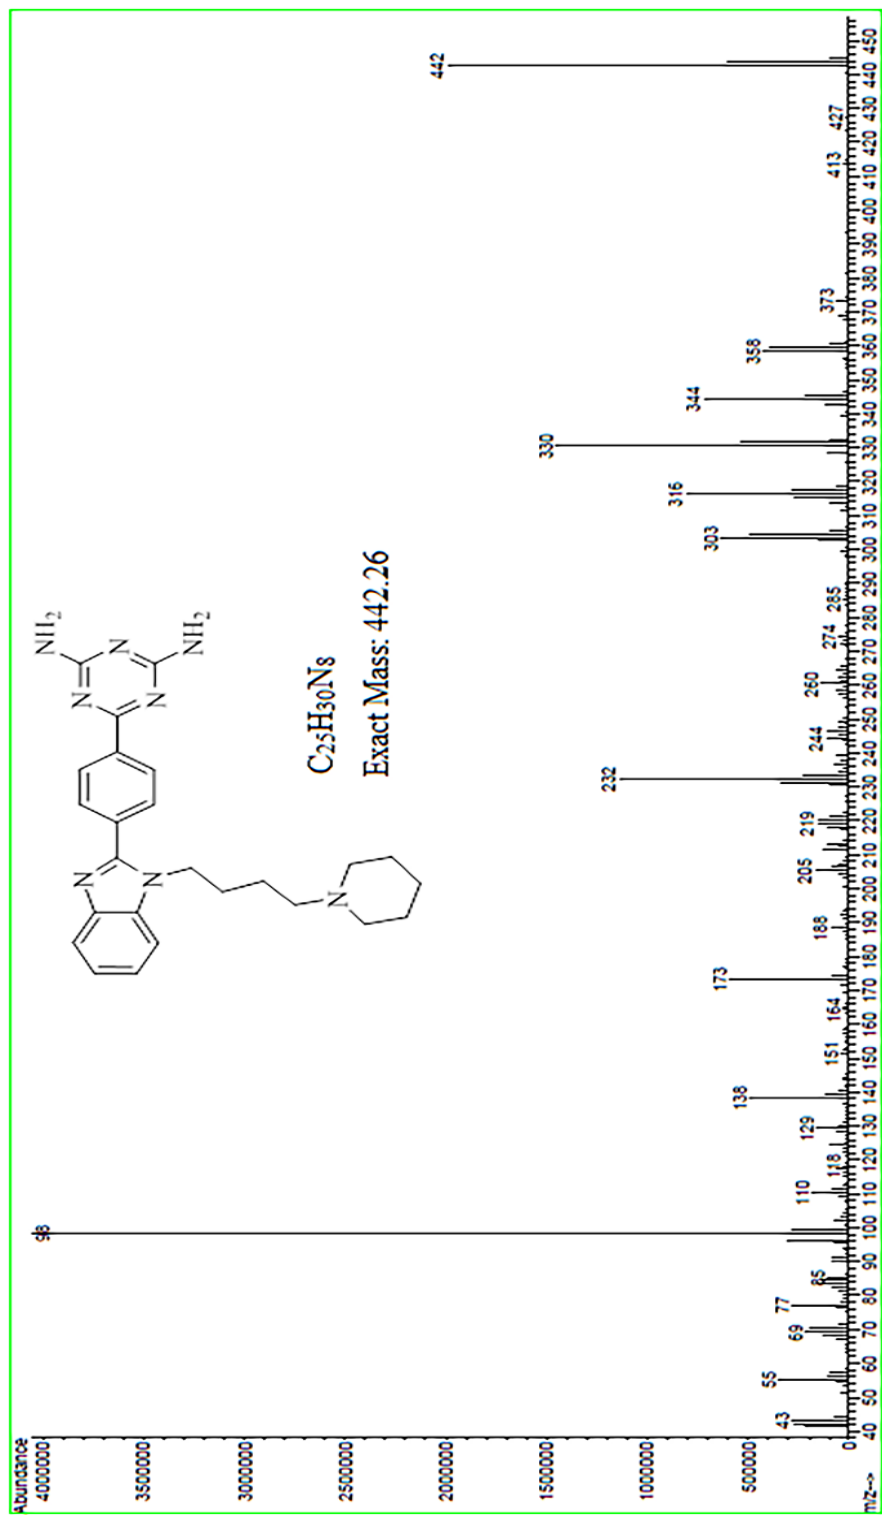

Figure 63. MASS spectrum of compound (9e)

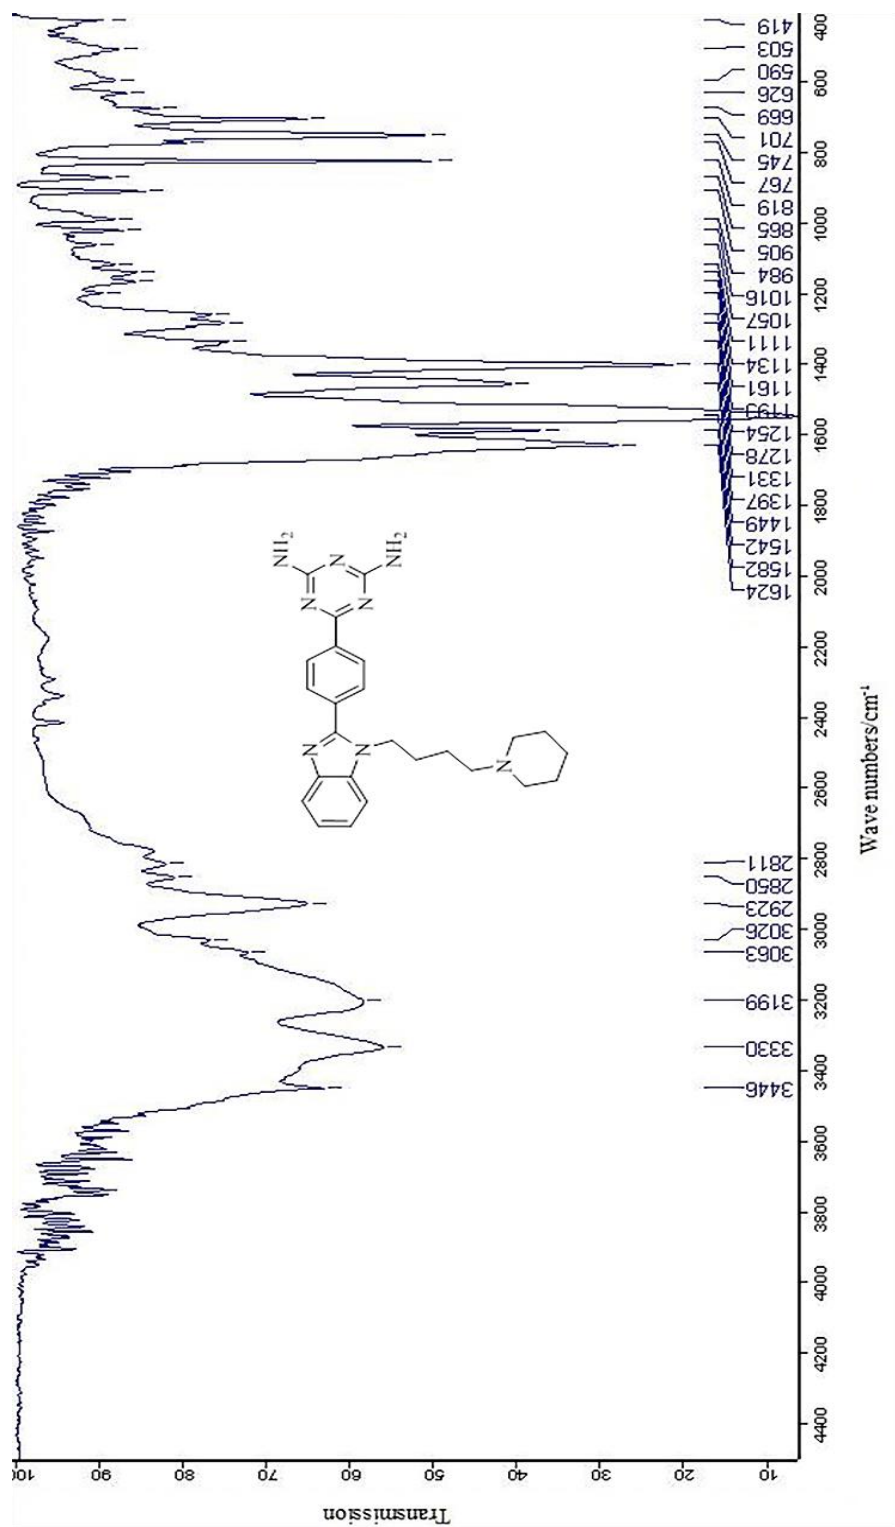

Figure 64. IR spectrum of compound (9e)

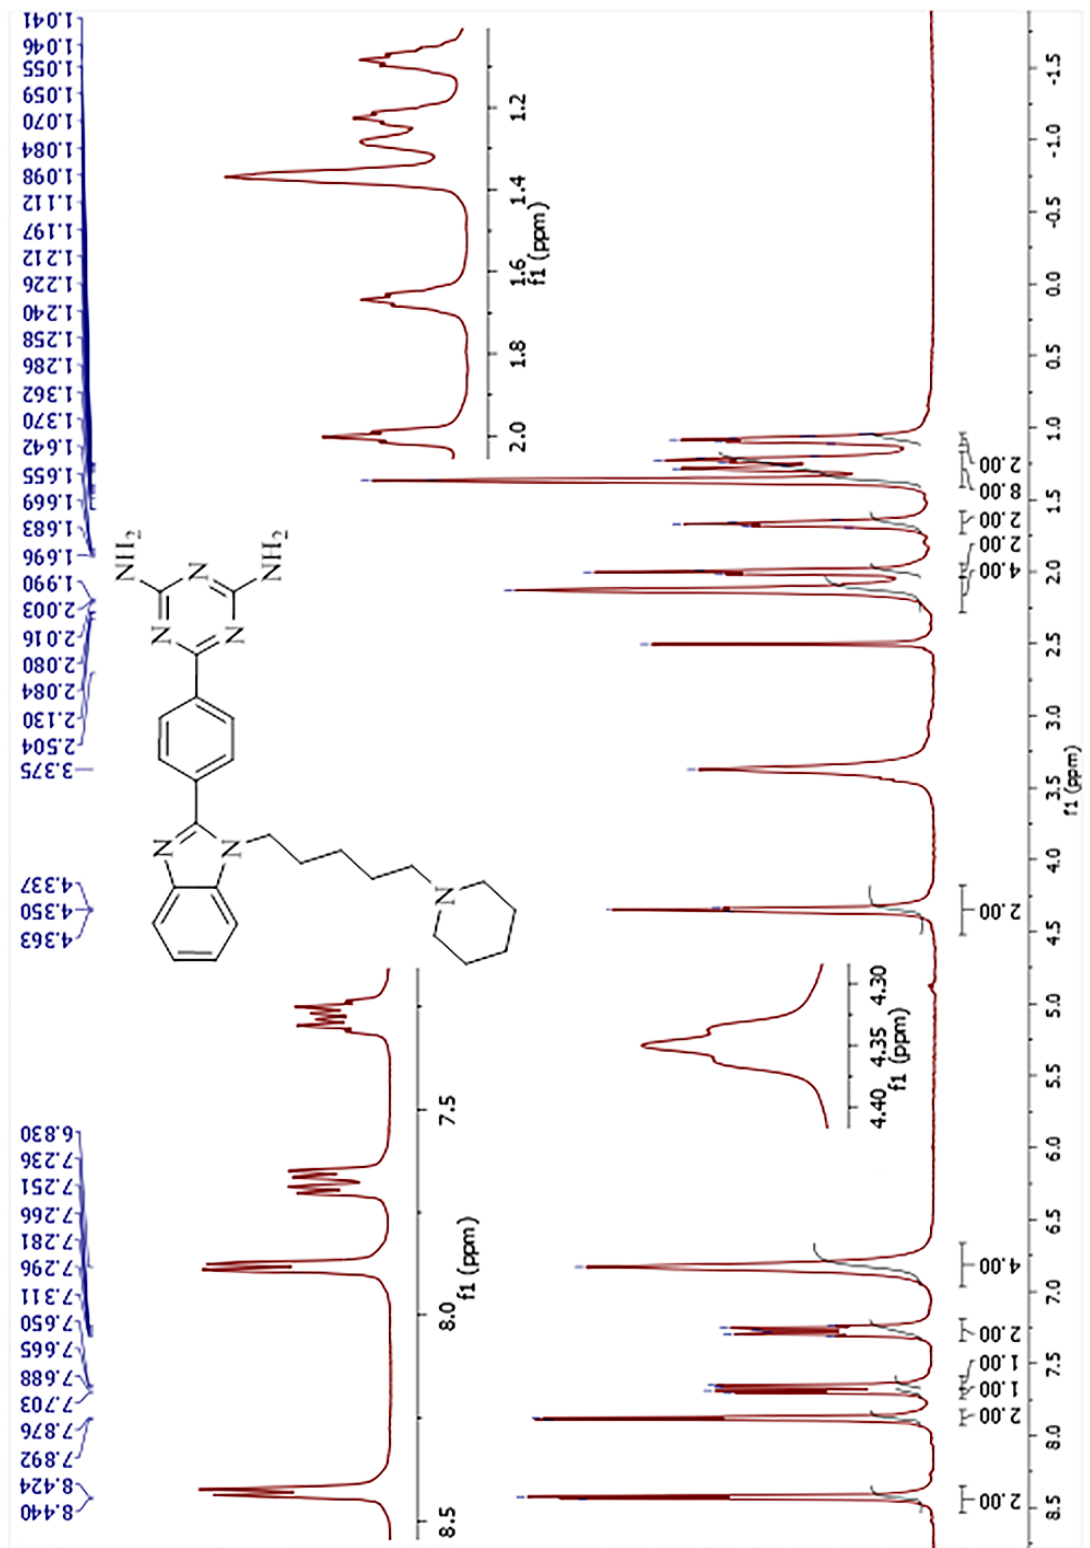

Figure 65. <sup>1</sup>H-NMR spectrum of compound (9f)

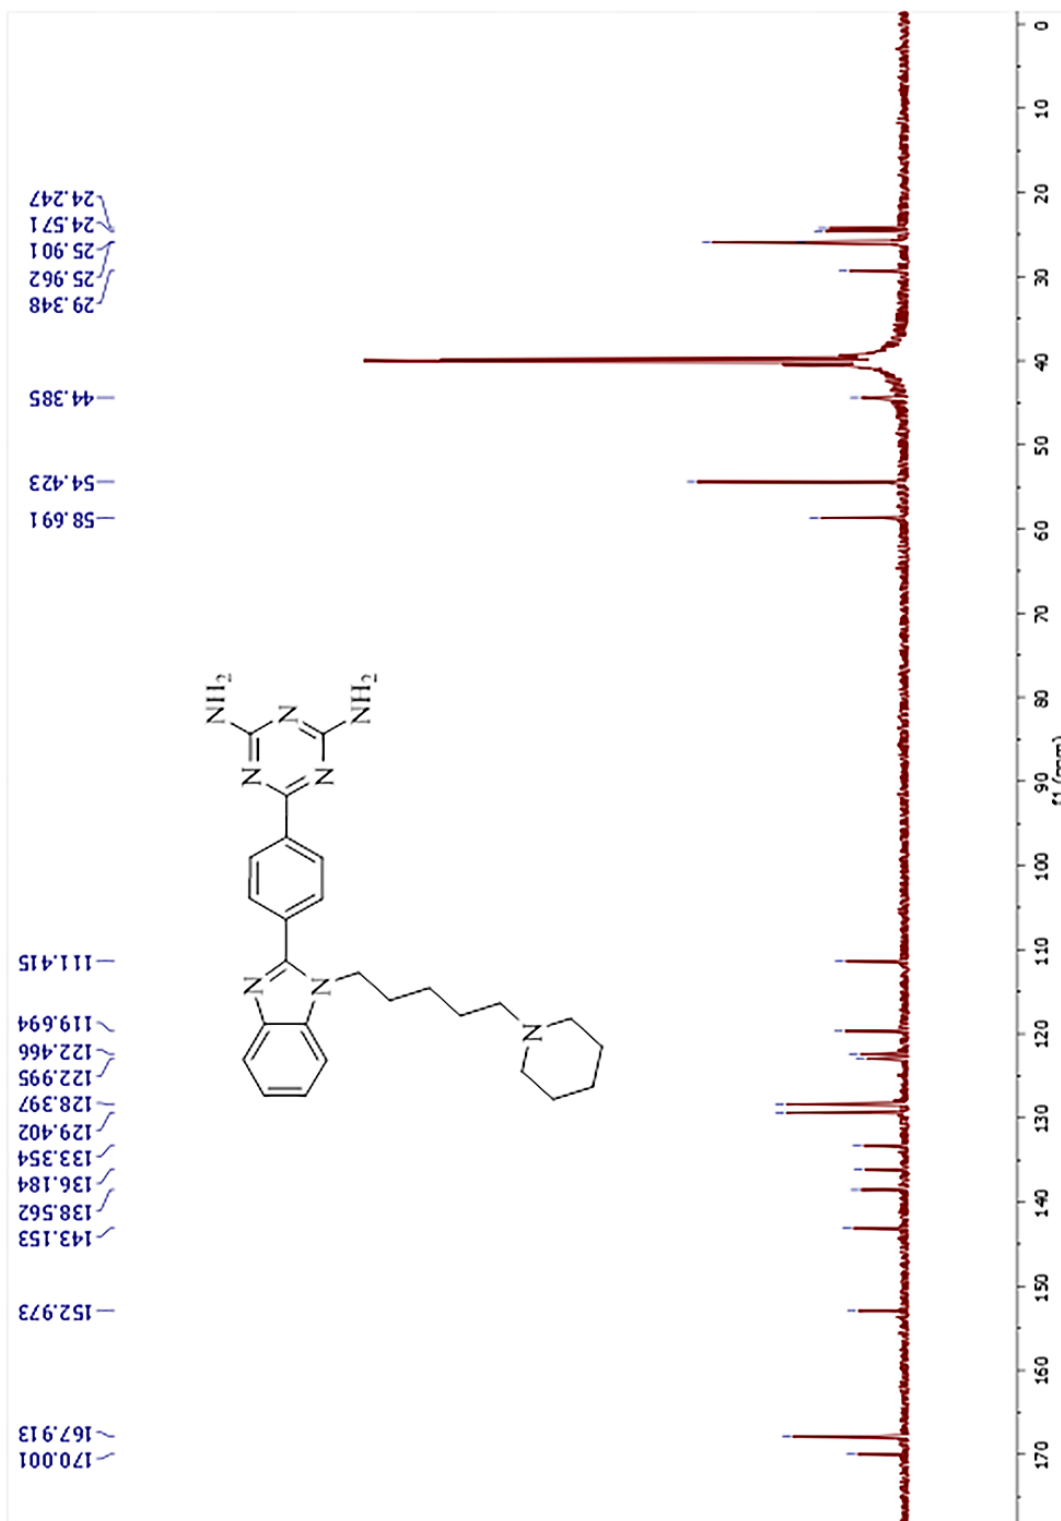

Figure 66.  $^{13}\text{C}$ -NMR spectrum of compound (9f)

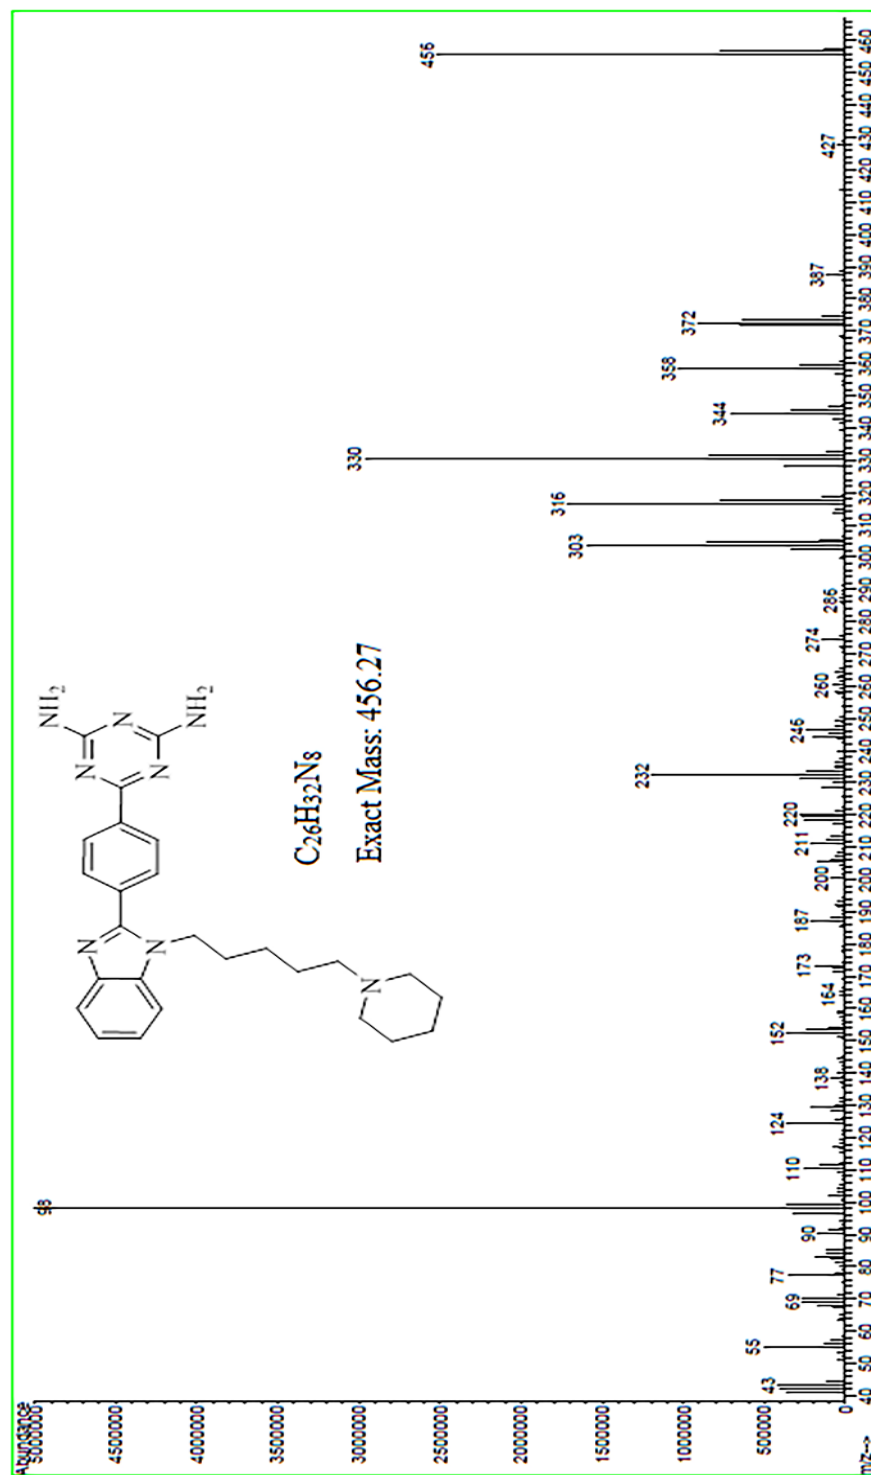

Figure 67. MASS spectrum of compound (9f)



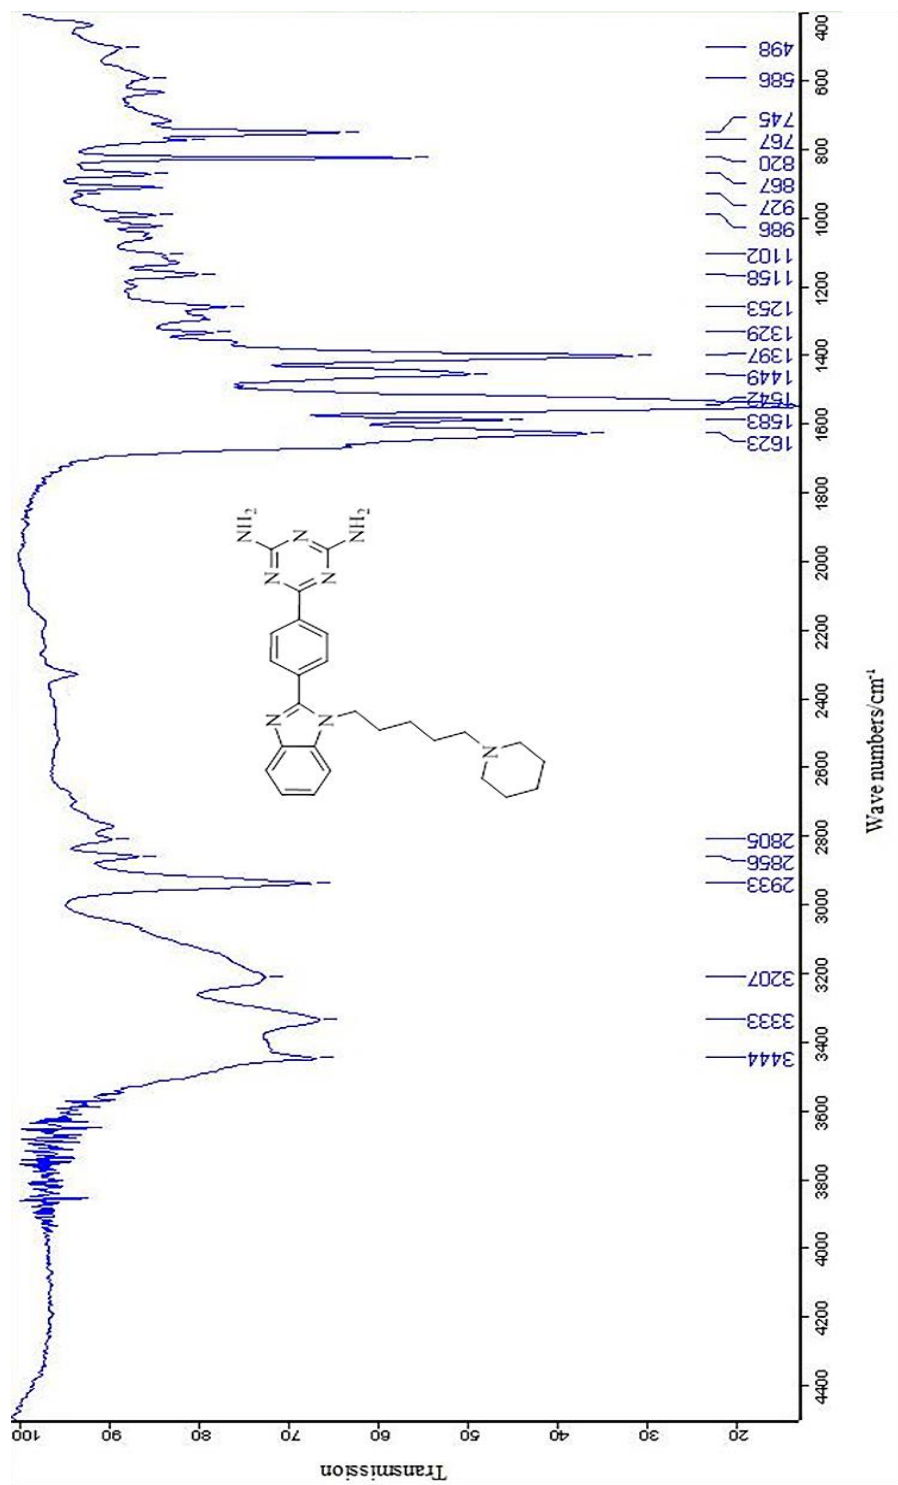

Figure 68. IR spectrum of compound (9f)

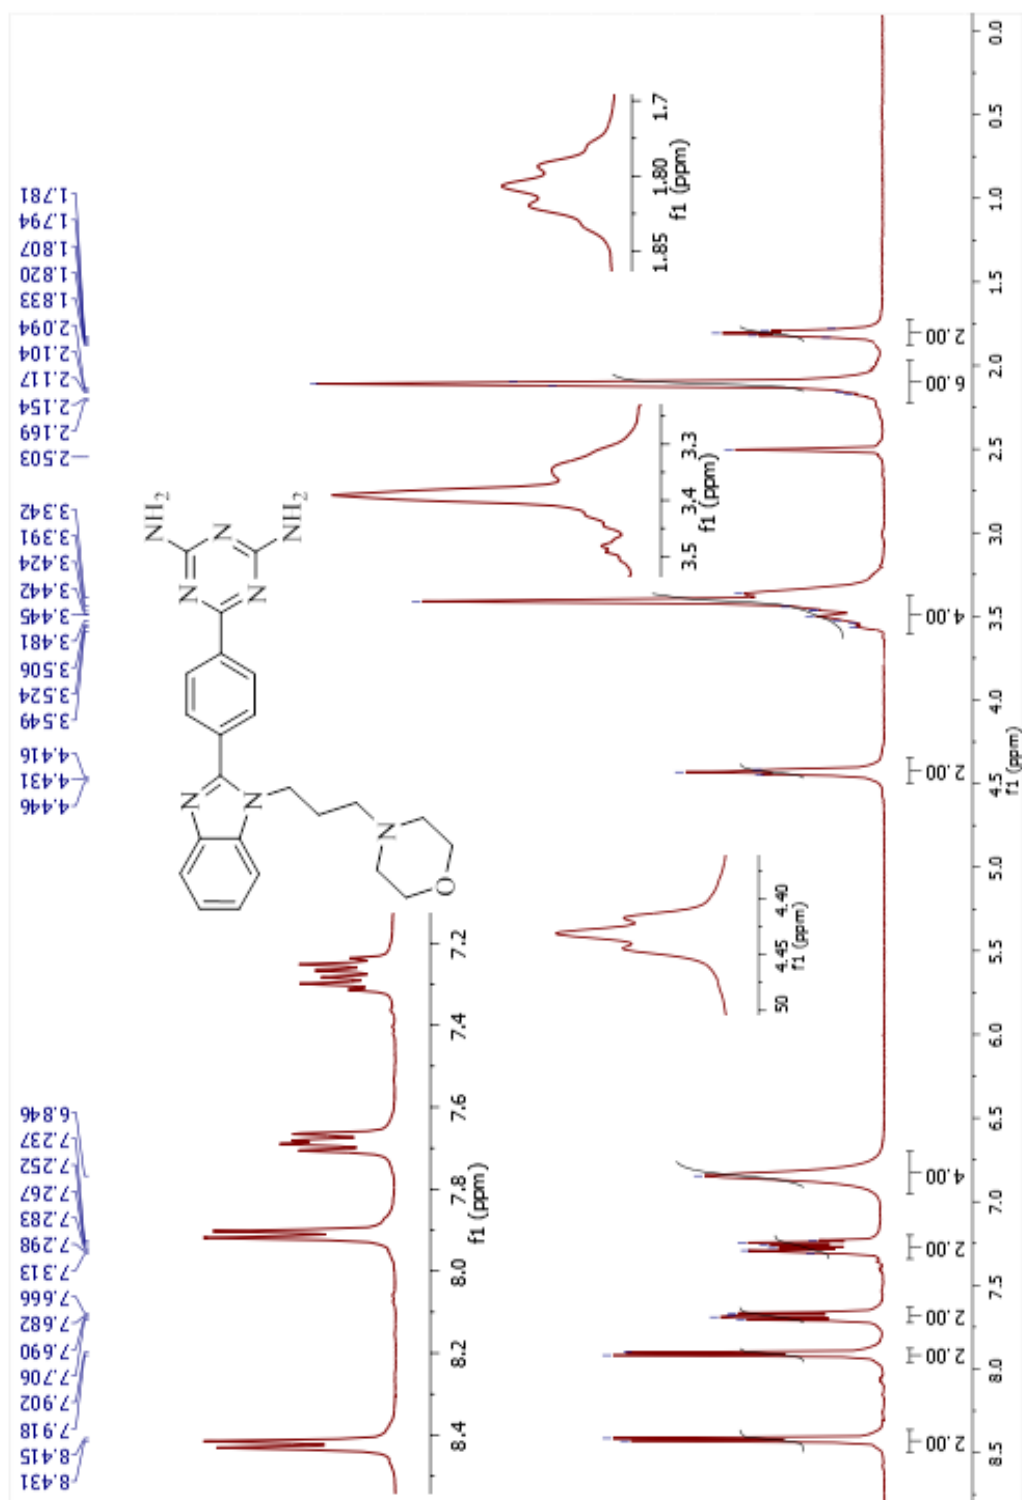

Figure 69. <sup>1</sup>H-NMR spectrum of compound (9g)

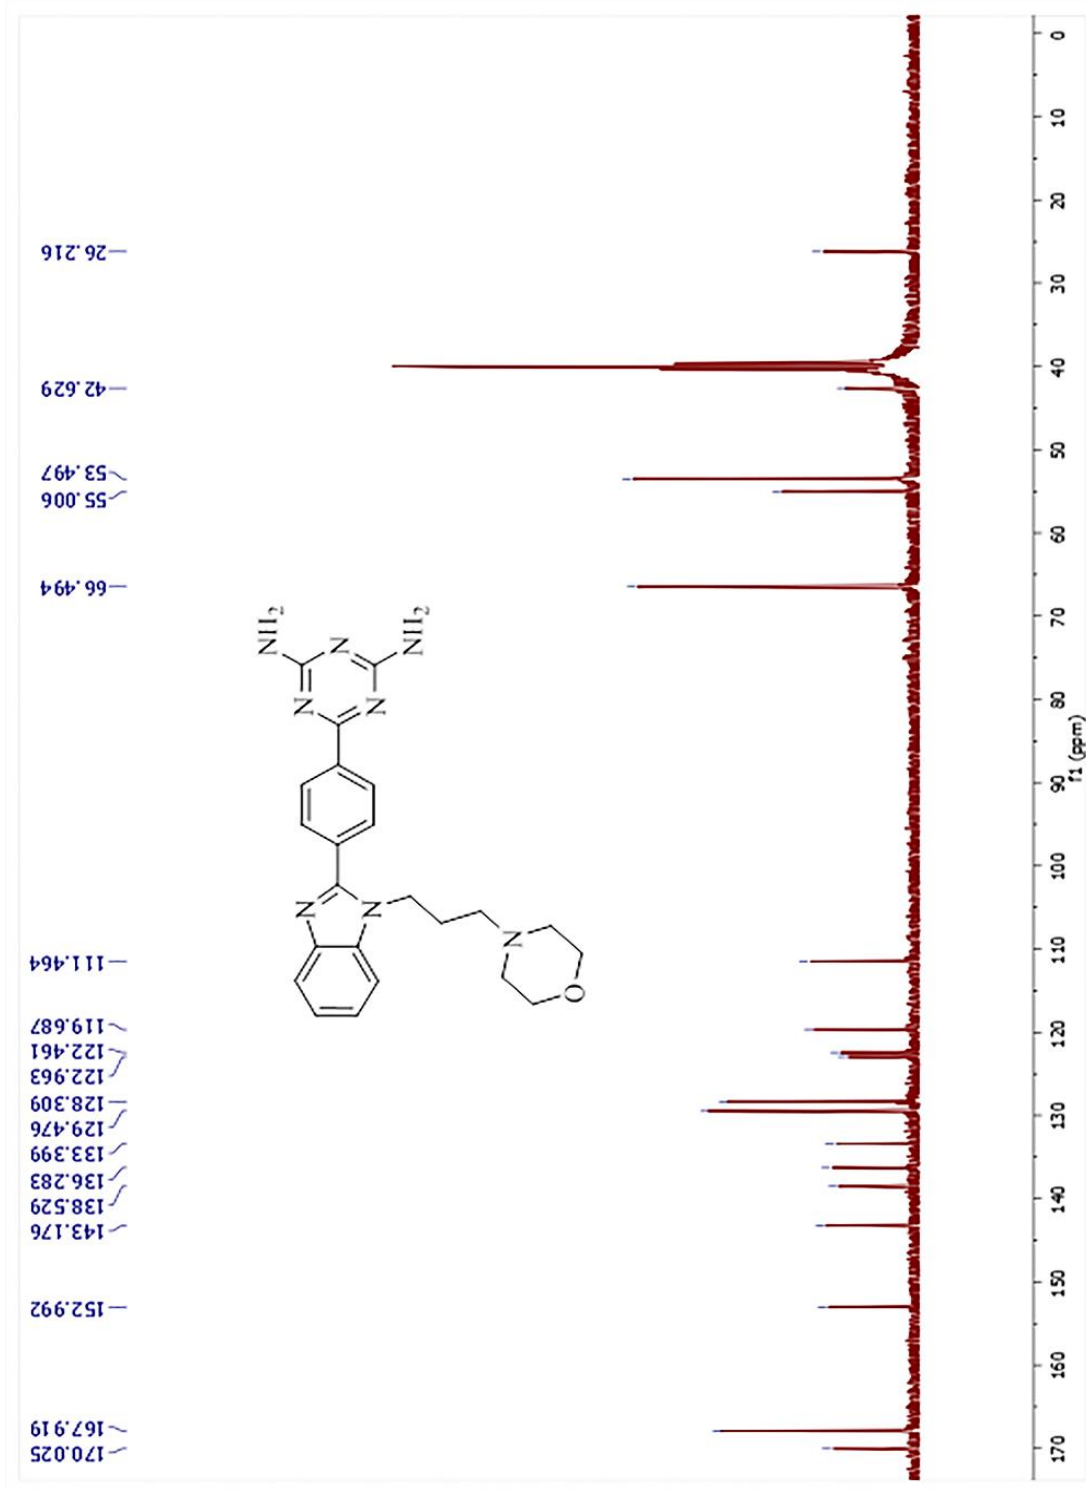

Figure 70. <sup>13</sup>C-NMR spectrum of compound (9g)

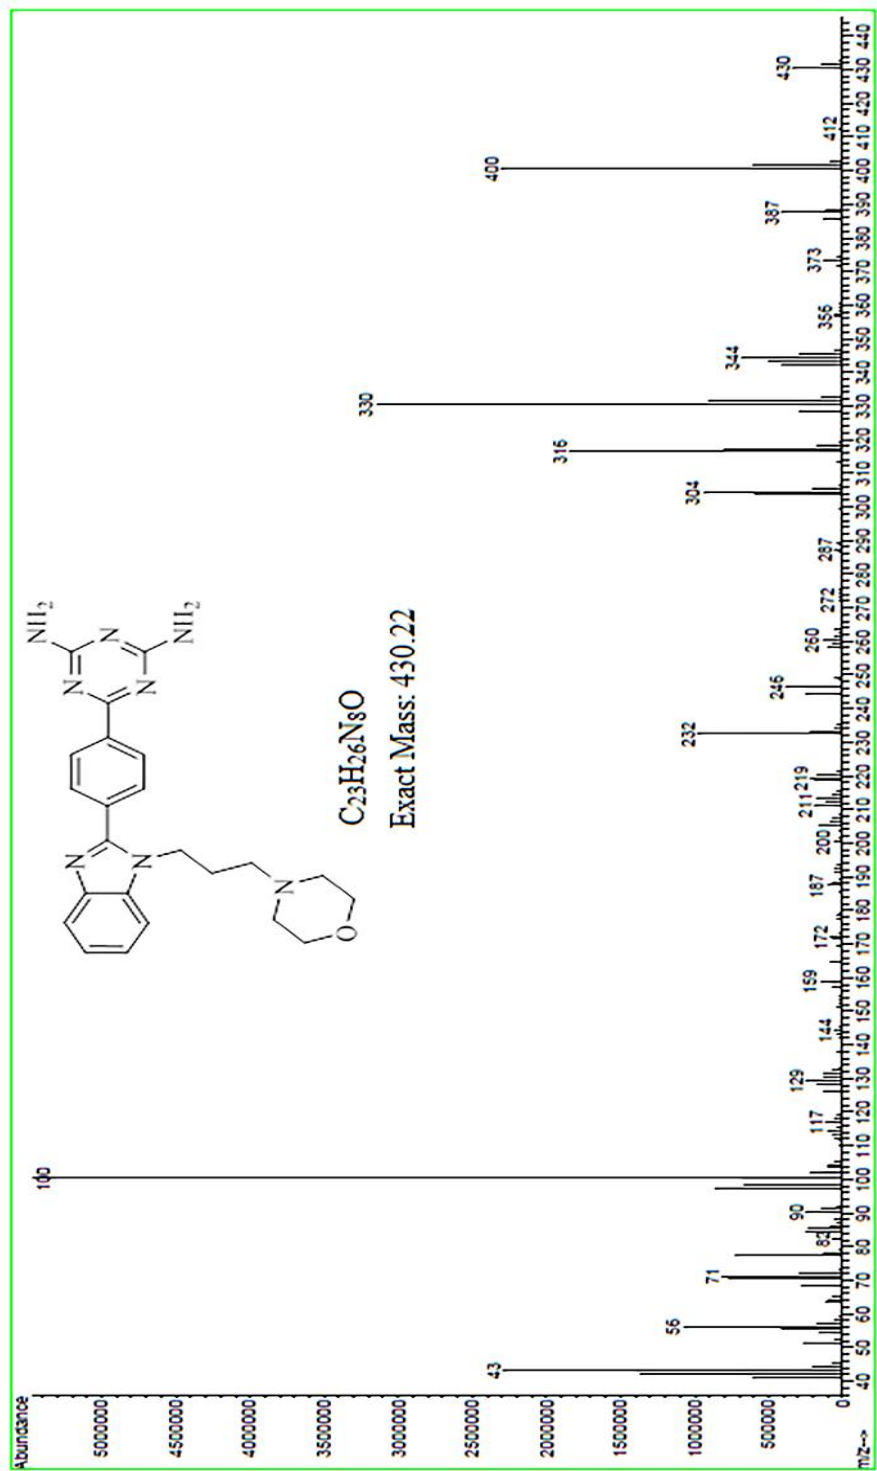

Figure 71. MASS spectrum of compound (9g)

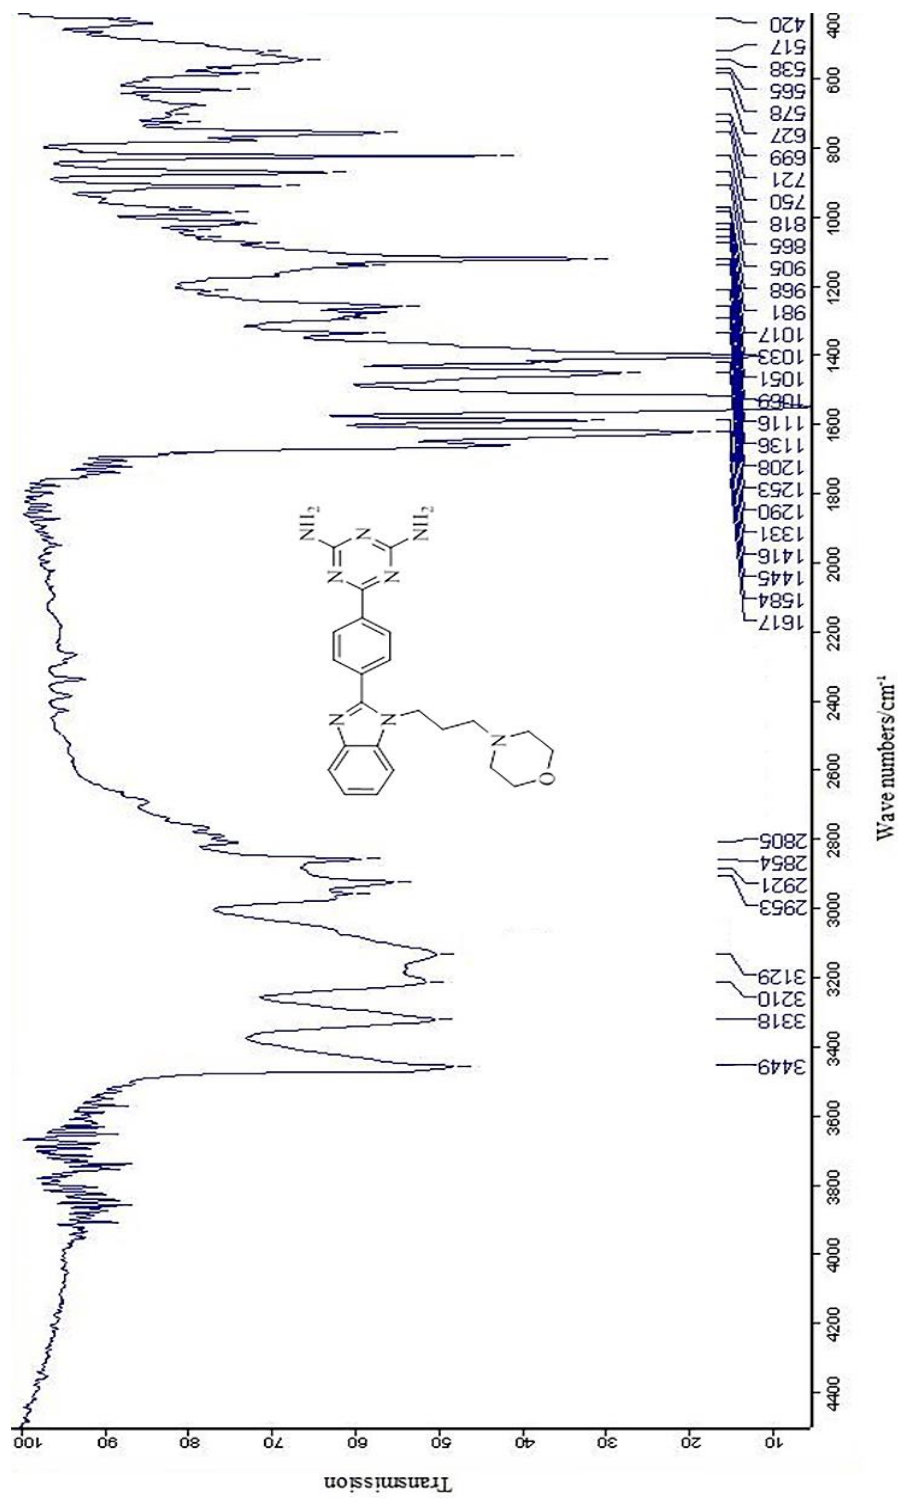

Figure 72. IR spectrum of compound (9g)

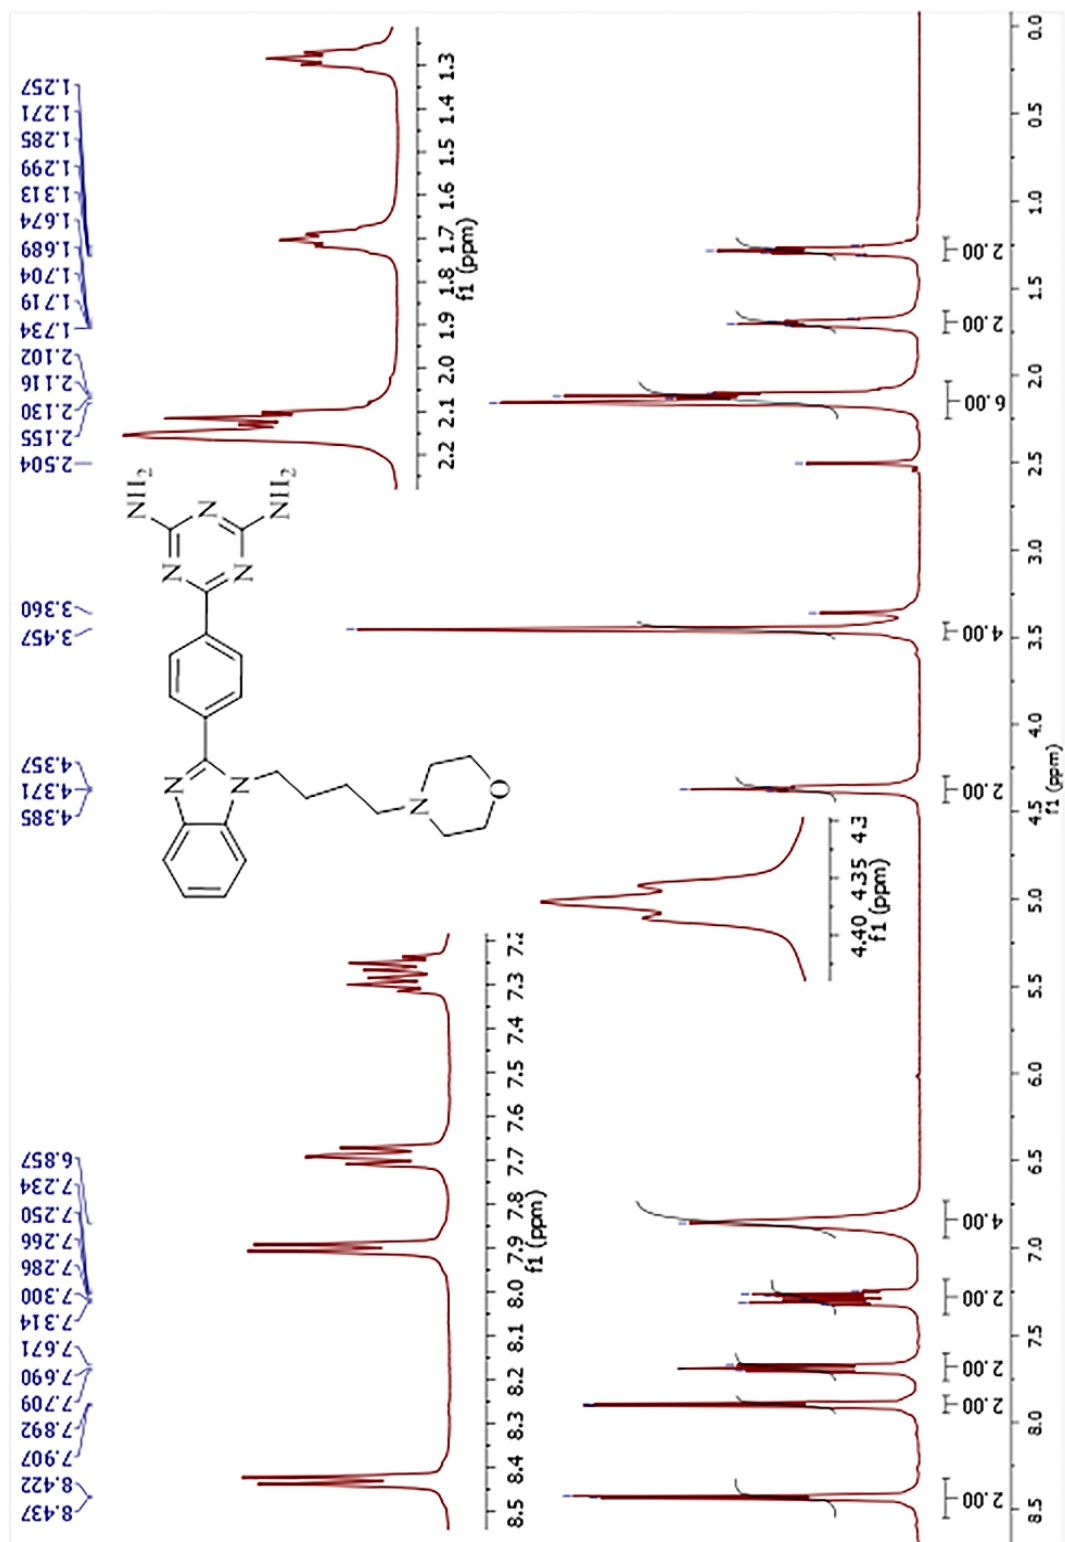

Figure 73. <sup>1</sup>H-NMR spectrum of compound (9h)

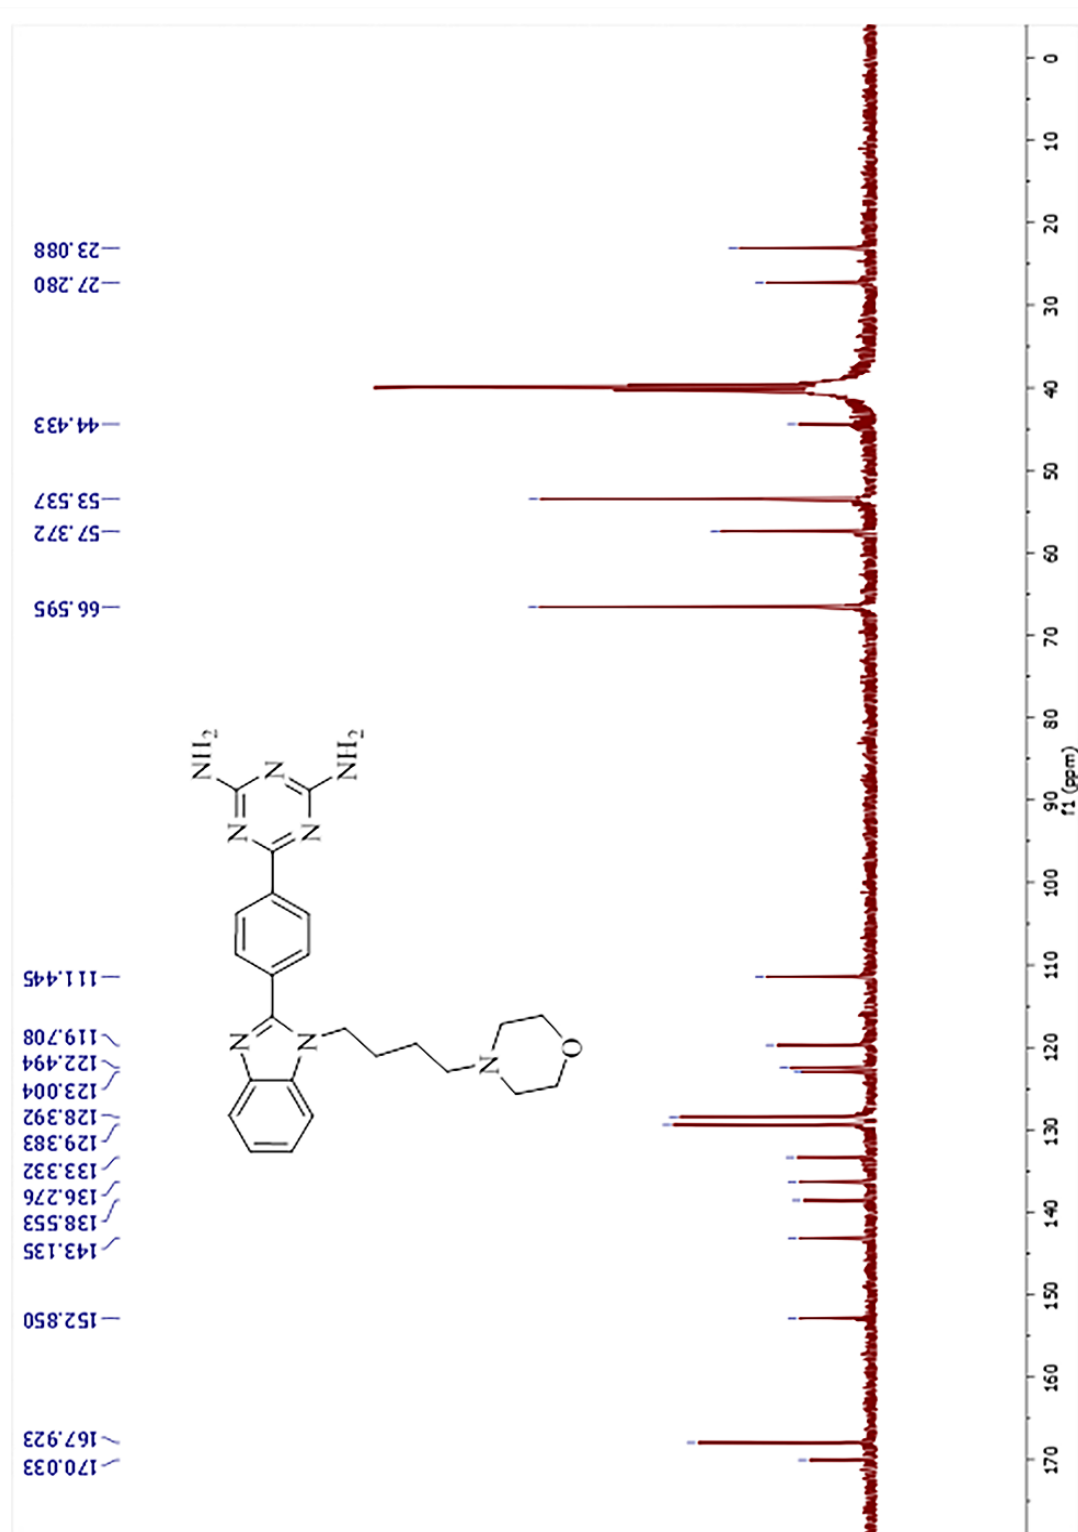

Figure 74.  $^{13}\text{C}$ -NMR spectrum of compound (9h)

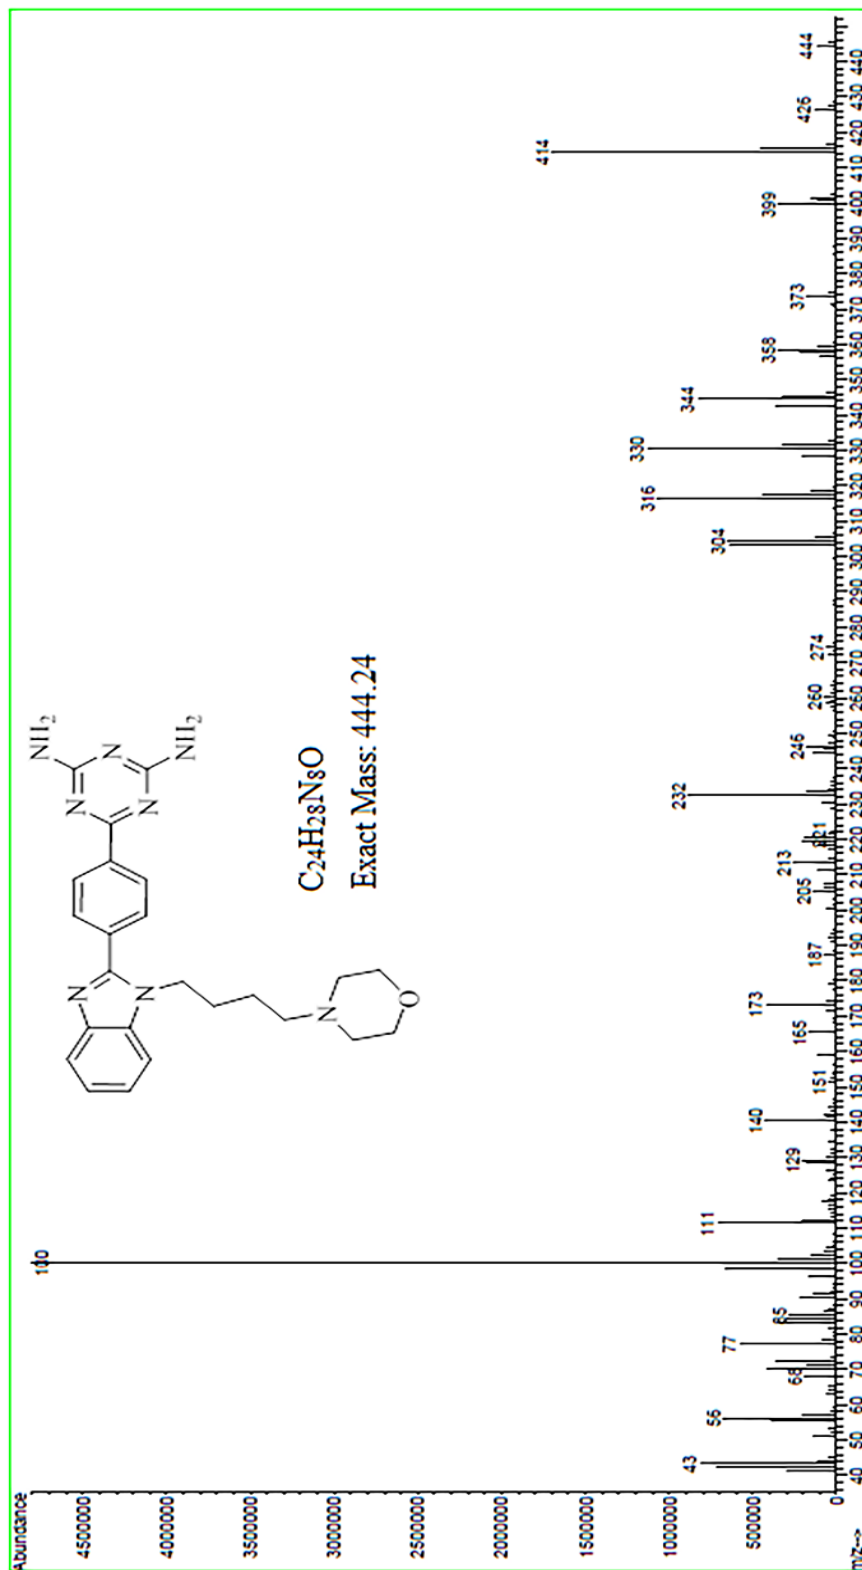

Figure 75. MASS spectrum of compound (9h)



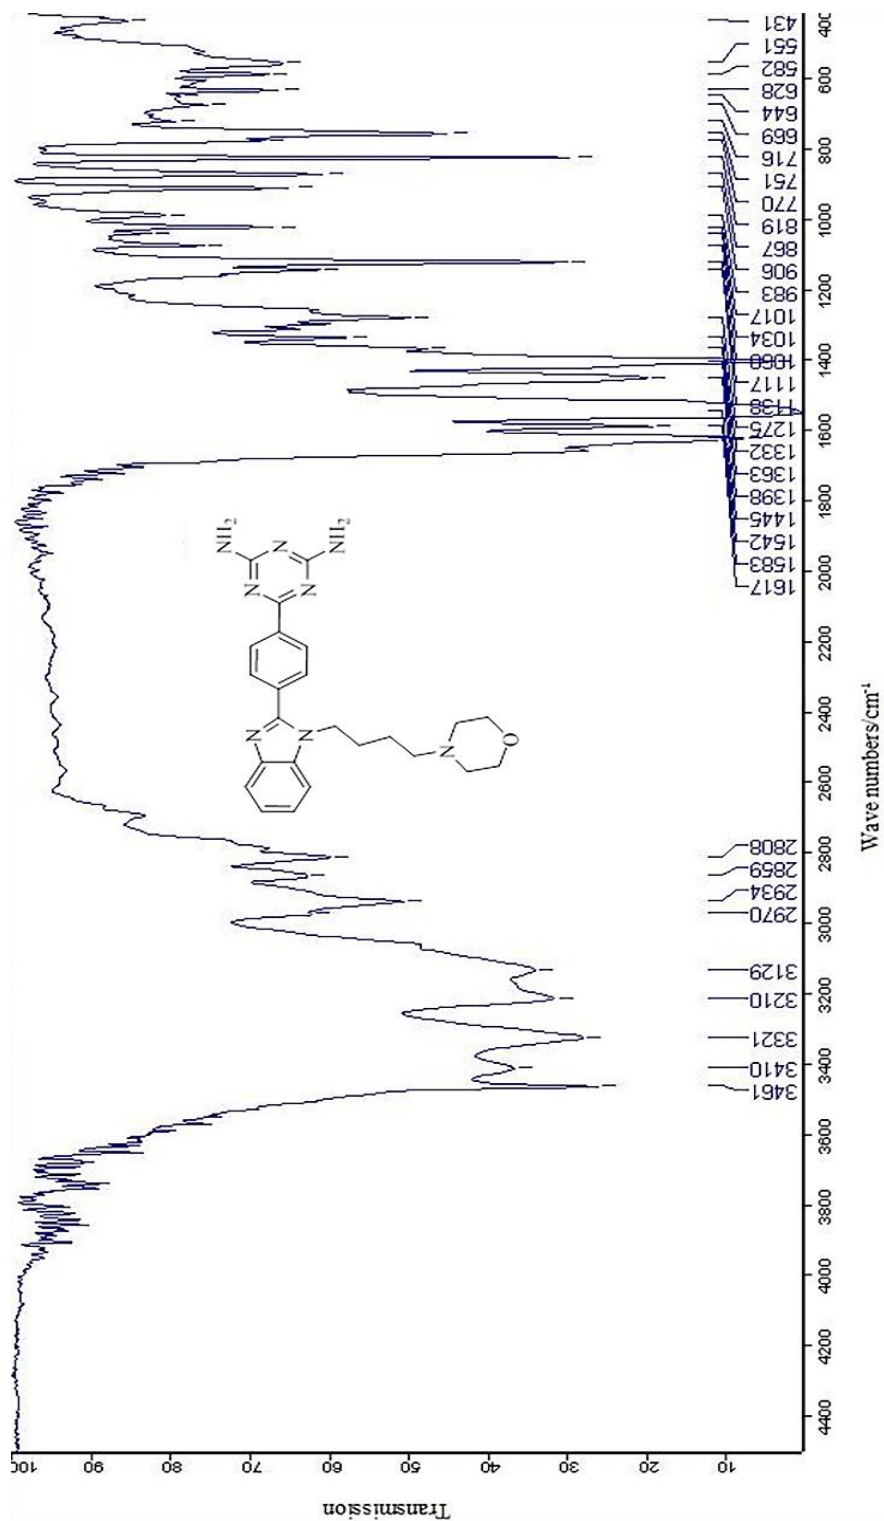

Figure 76. IR spectrum of compound (9h)

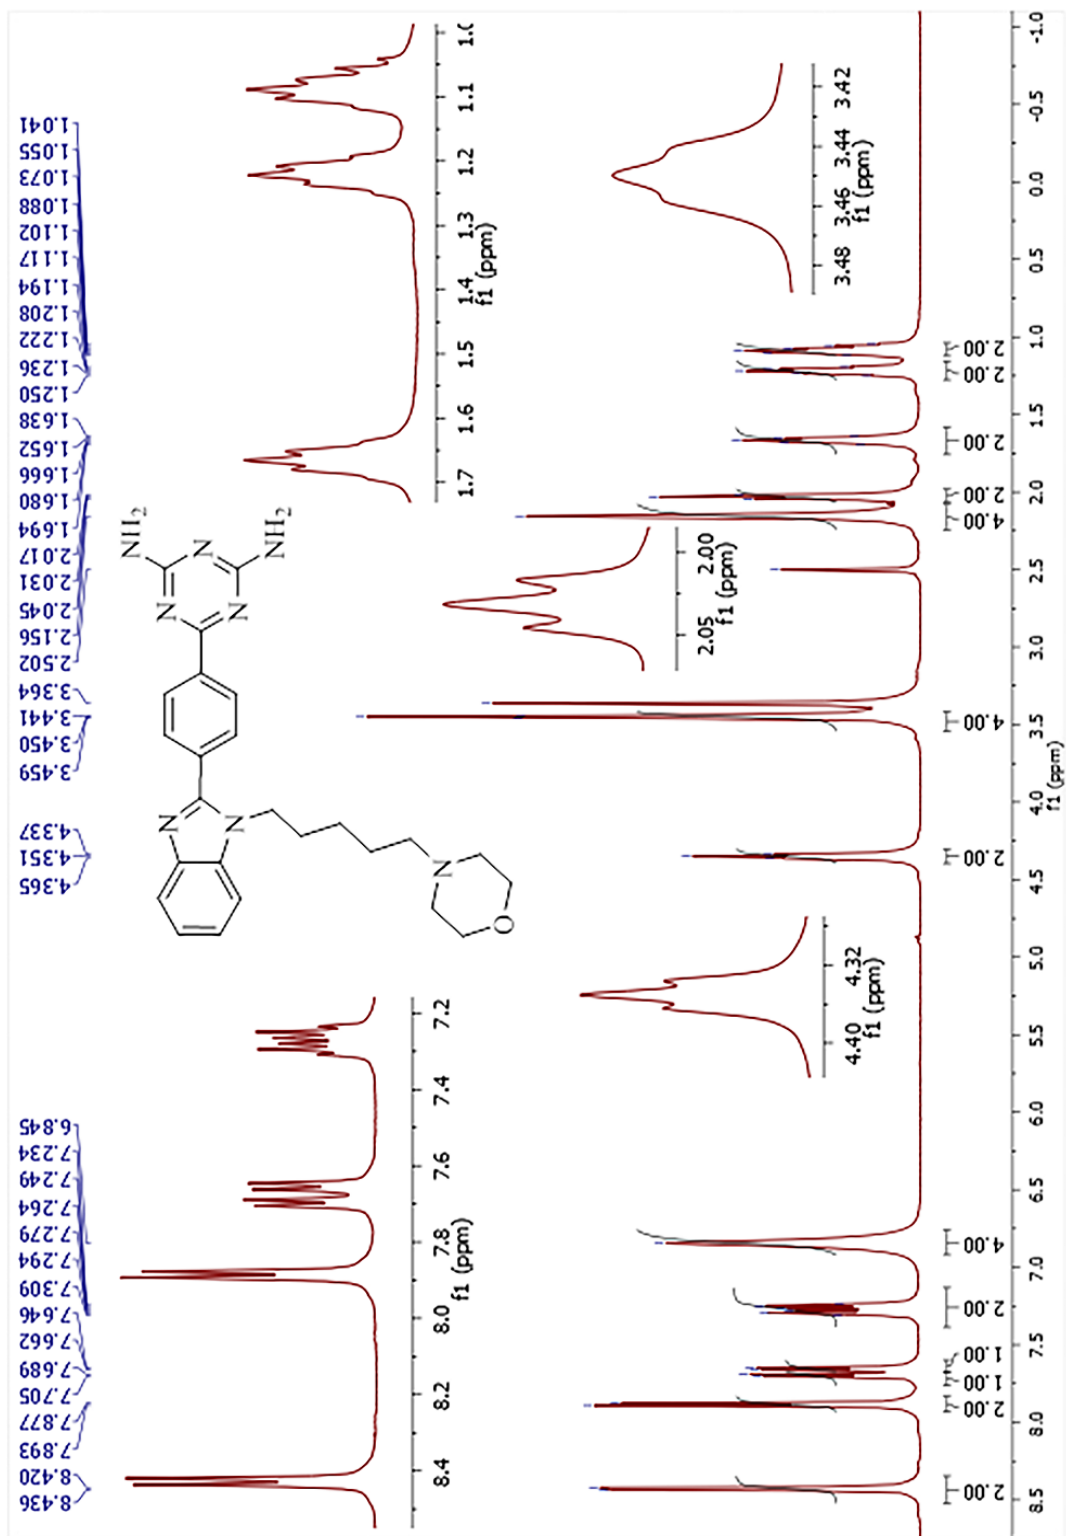

Figure 77. <sup>1</sup>H-NMR spectrum of compound (9i)

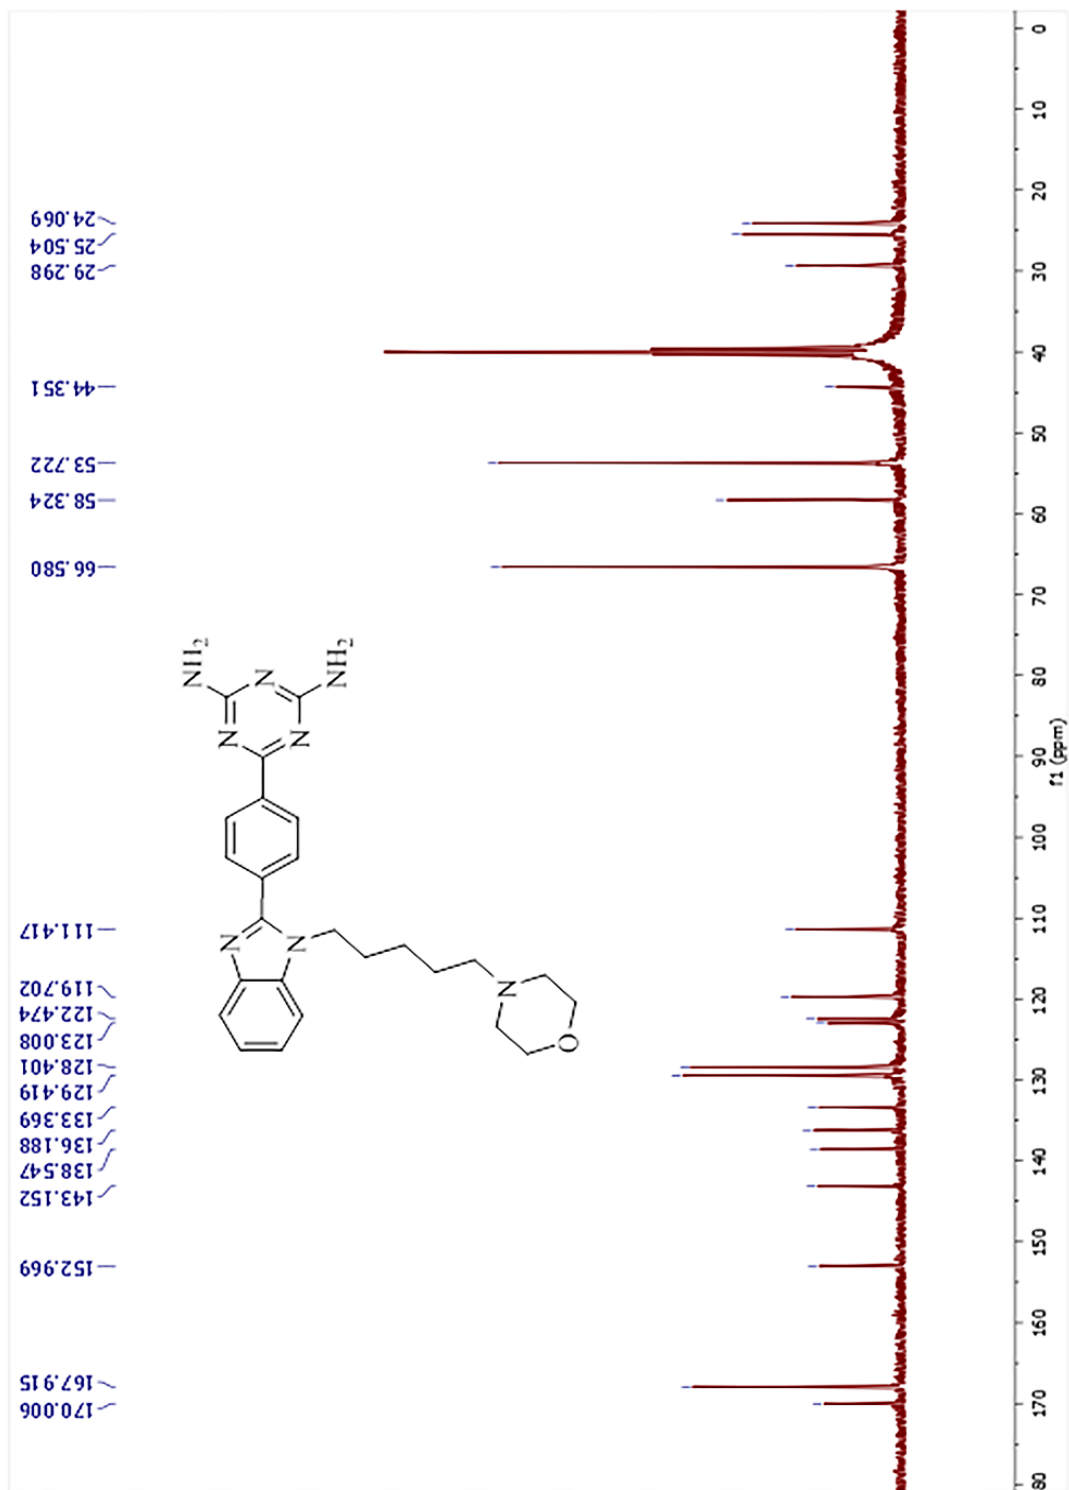

Figure 78.  $^{13}\text{C}$ -NMR spectrum of compound (9i)

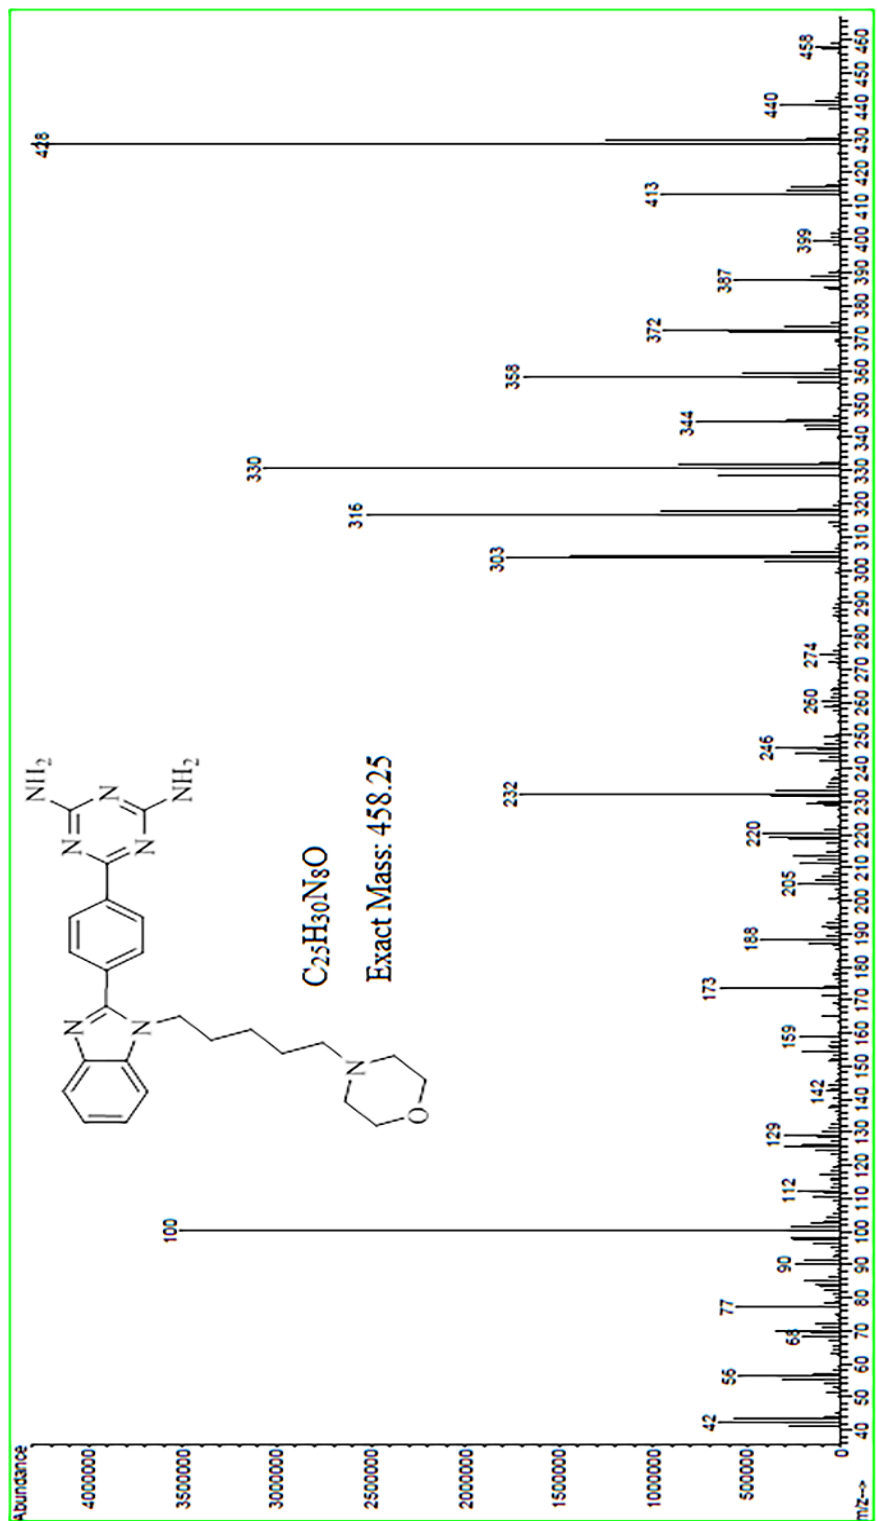

Figure 79. MASS spectrum of compound (9i)

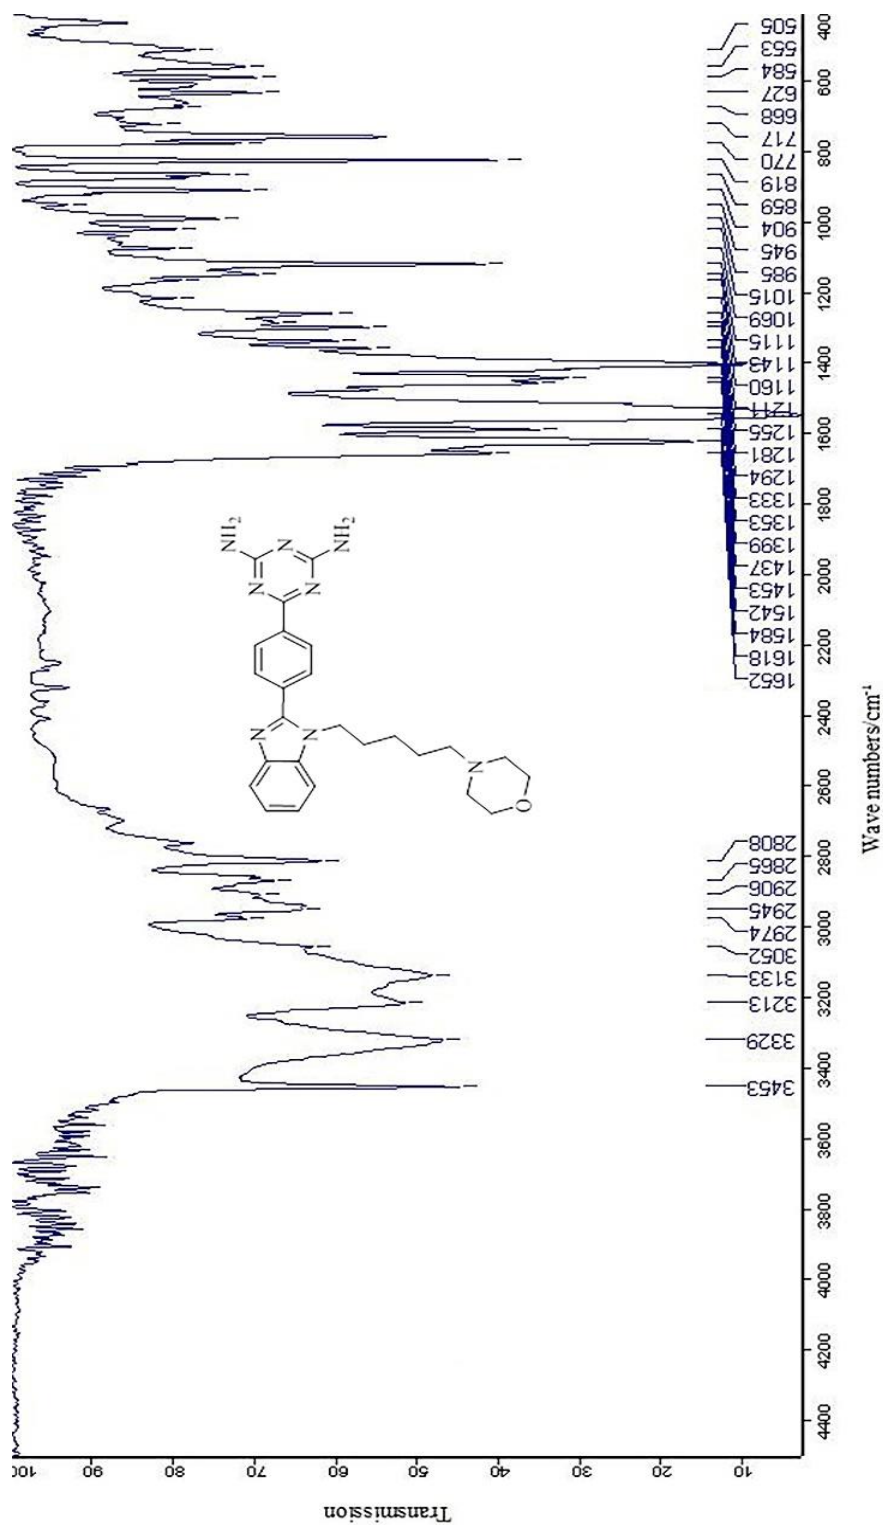

Figure 80. IR spectrum of compound (9i)

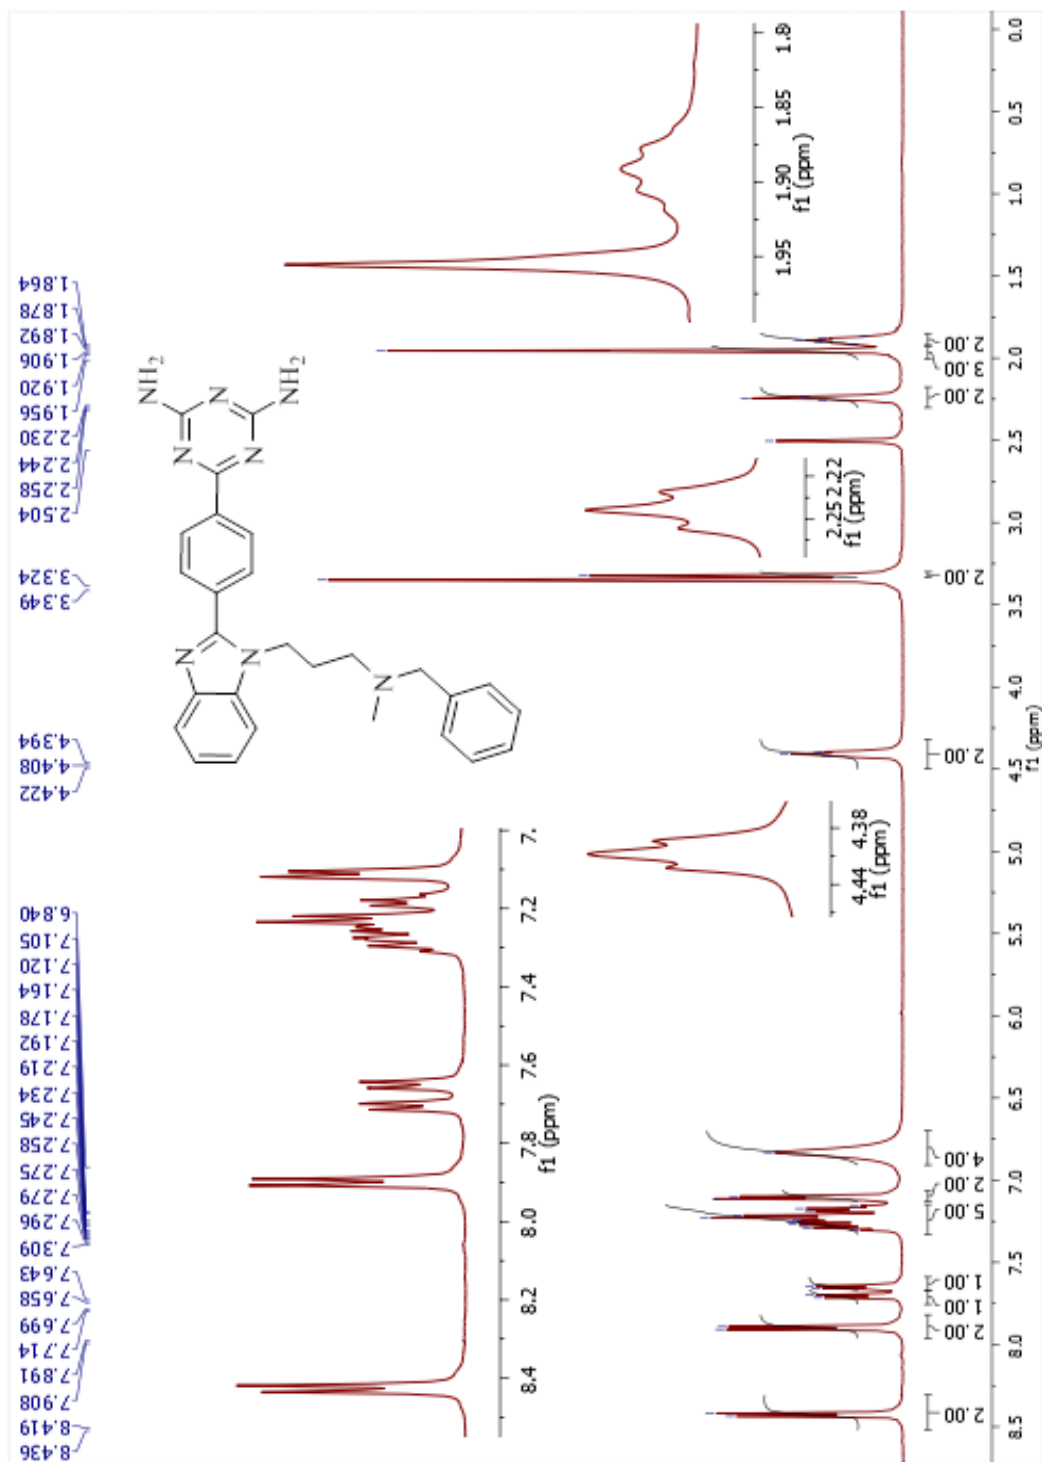

Figure 81. <sup>1</sup>H-NMR spectrum of compound (9j)

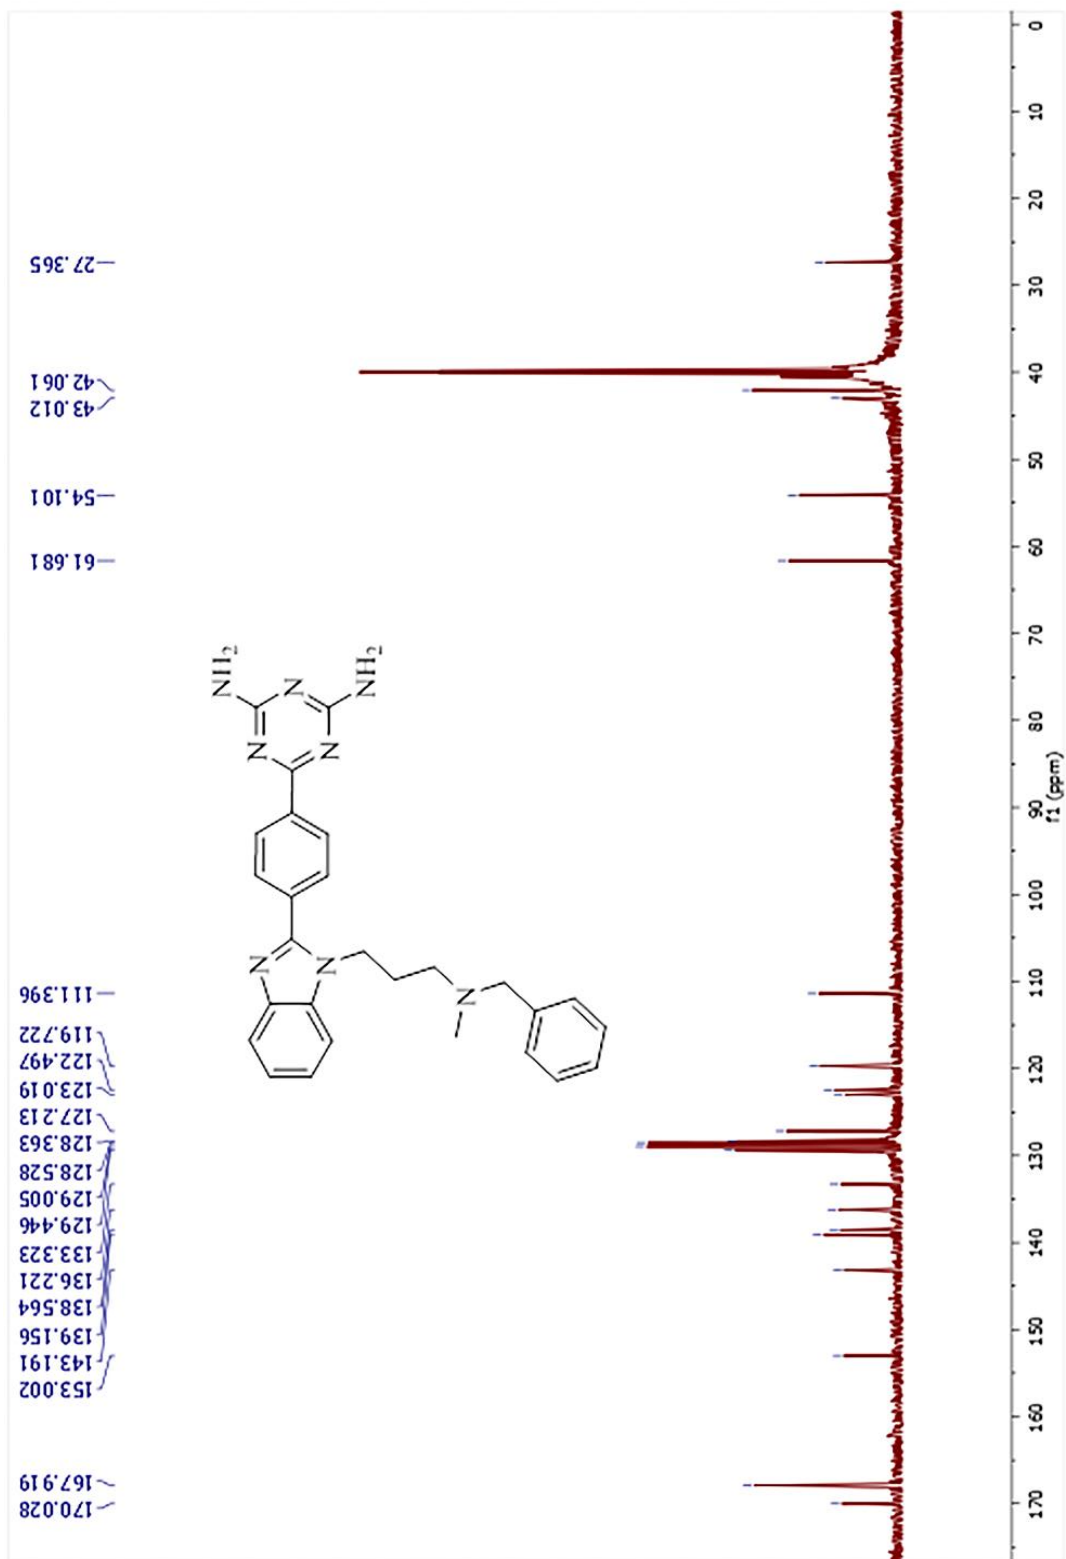

Figure 82. <sup>13</sup>C-NMR spectrum of compound (9j)

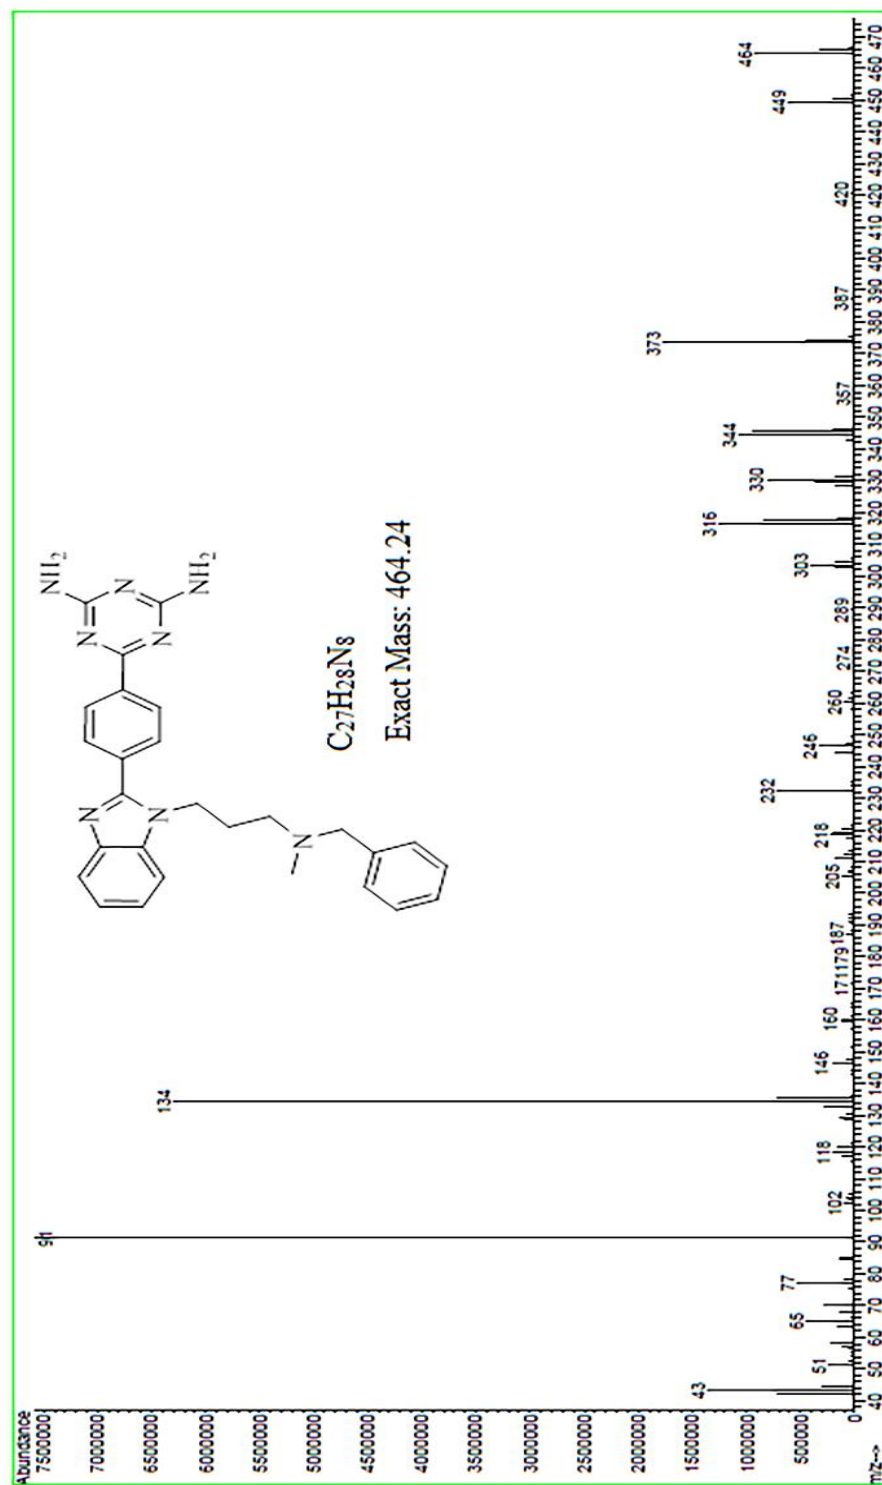

Figure 83. MASS spectrum of compound (9j)



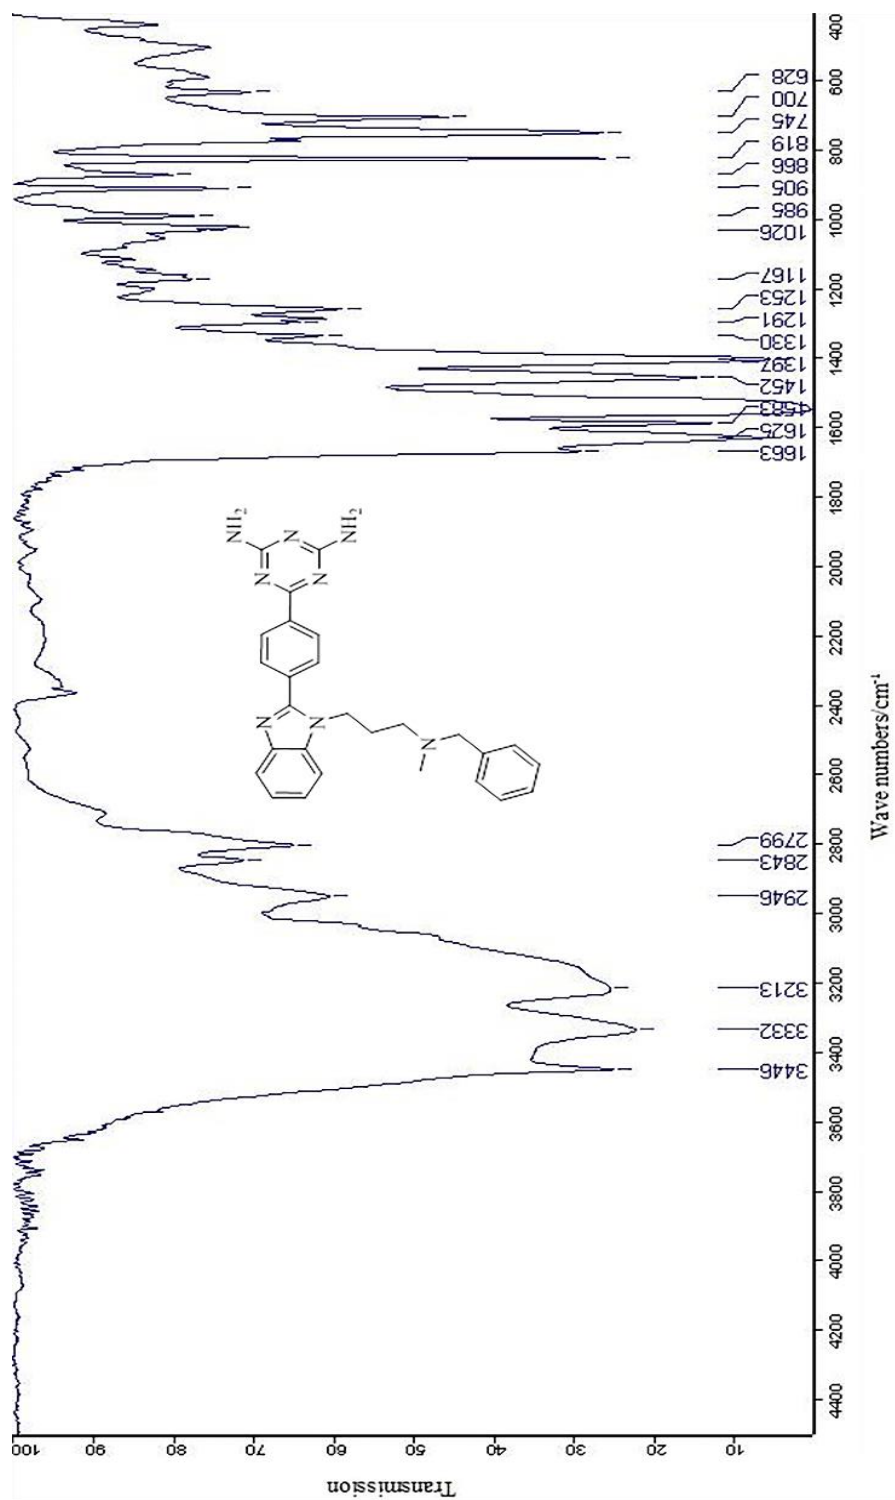

Figure 84. IR spectrum of compound (9j)

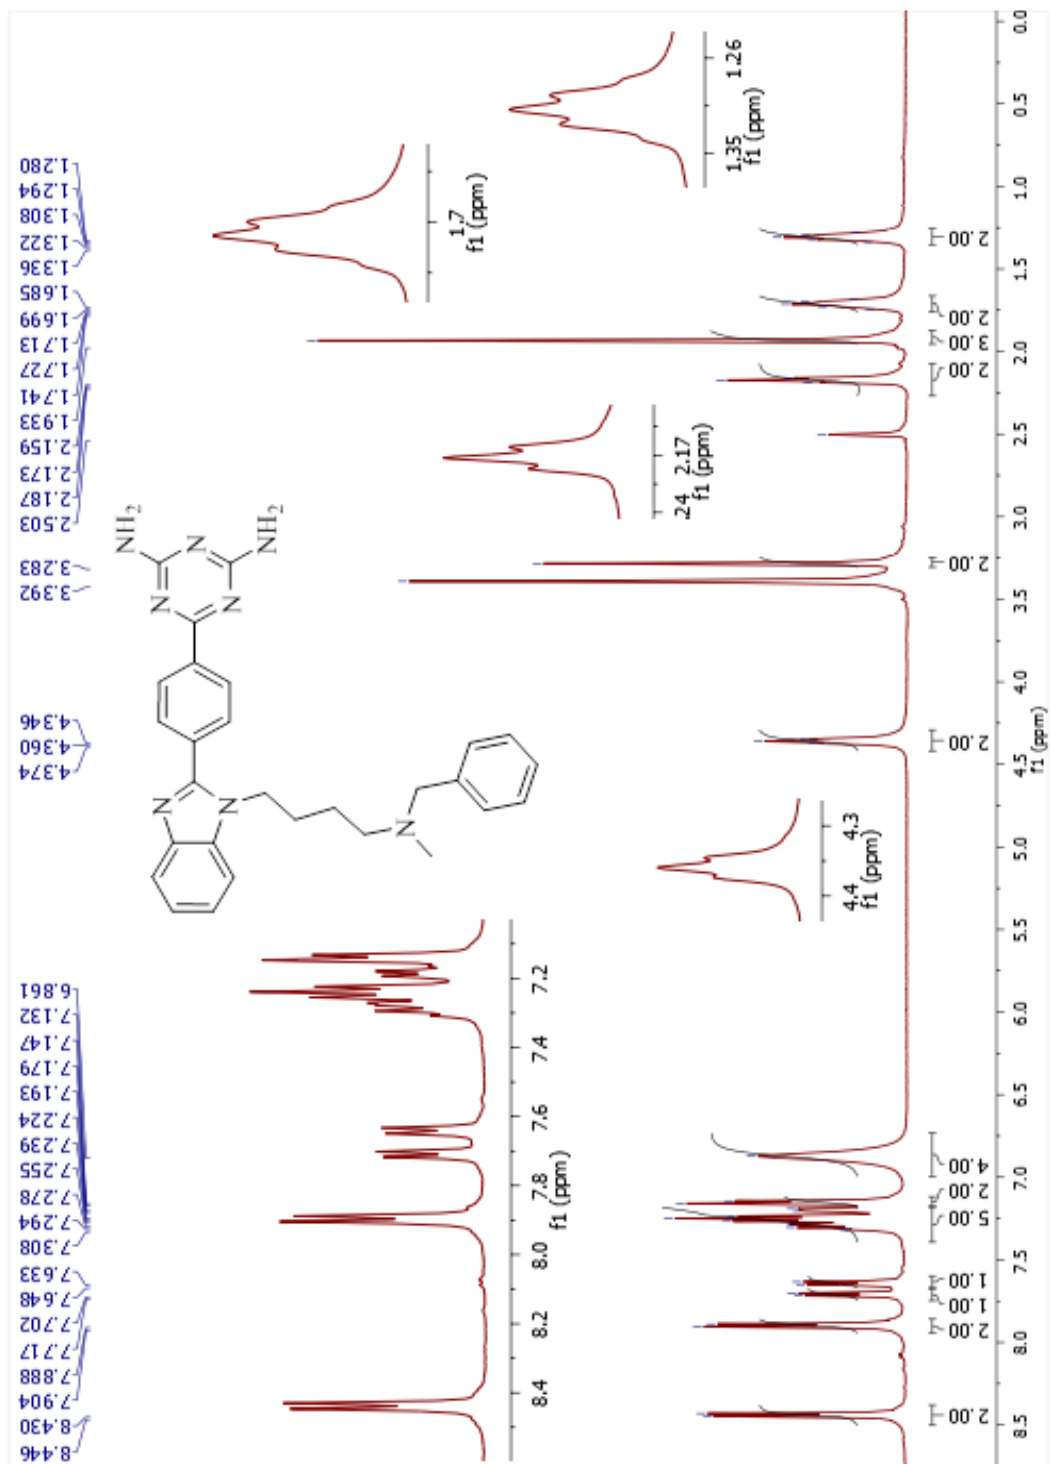

Figure 85. <sup>1</sup>H-NMR spectrum of compound (9k)

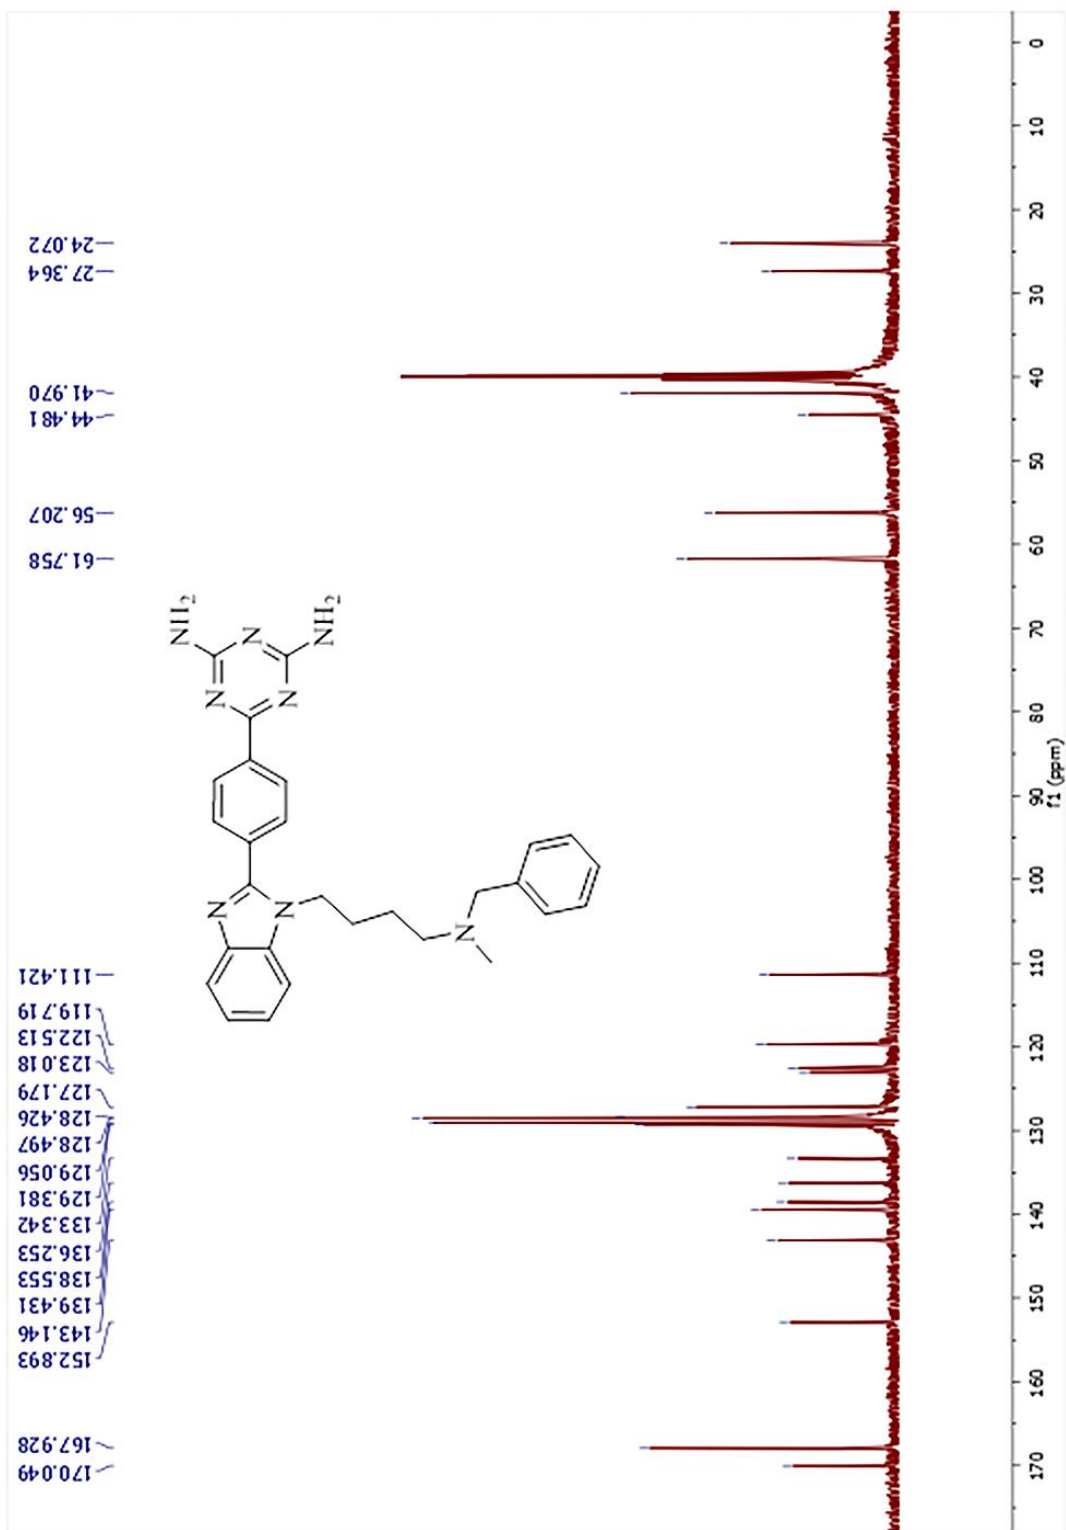

Figure 86. <sup>13</sup>C-NMR spectrum of compound (9k)

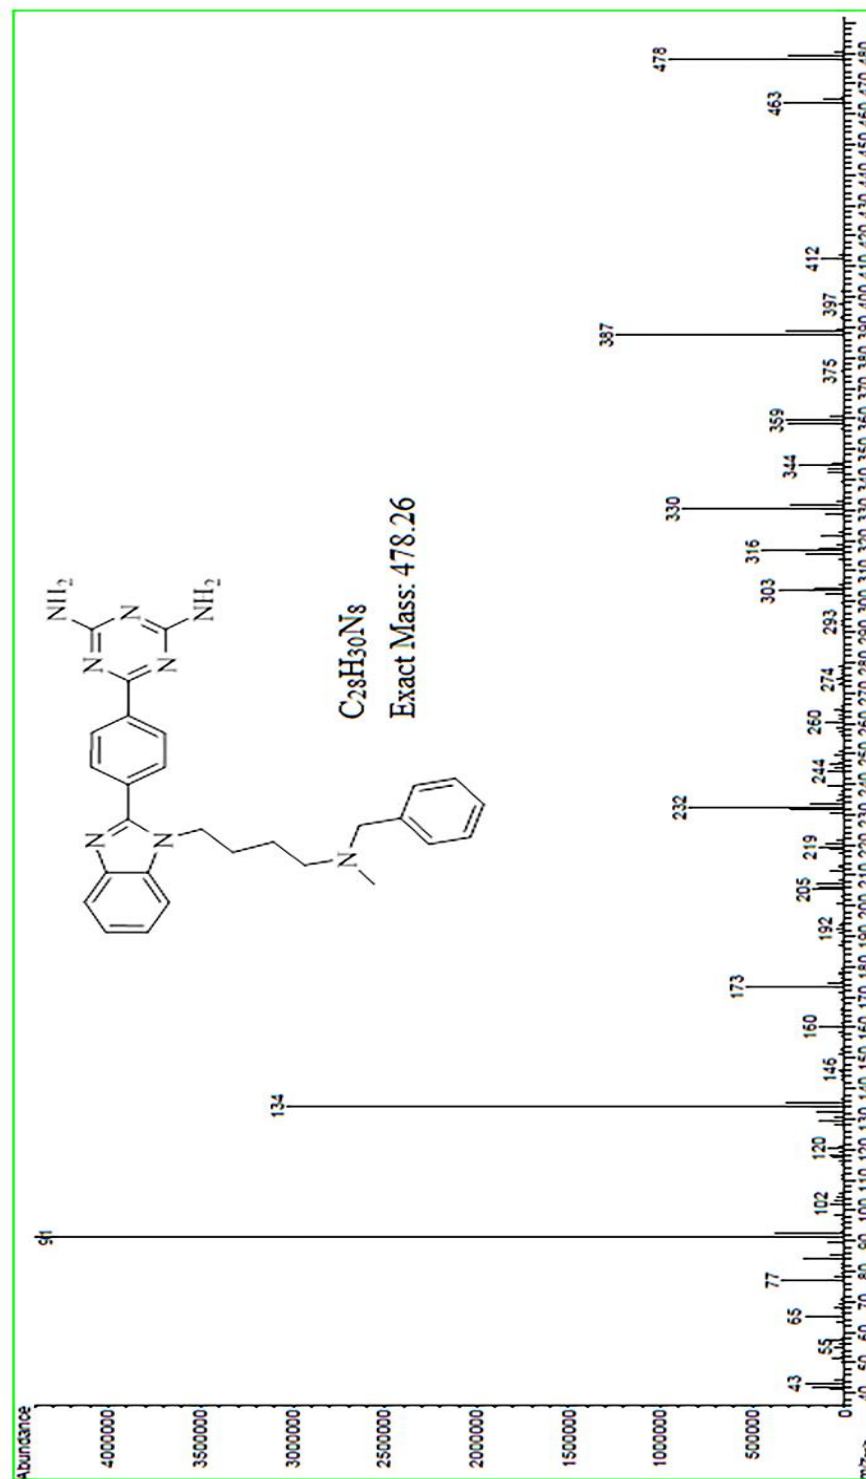

Figure 87. MASS spectrum of compound (9k)

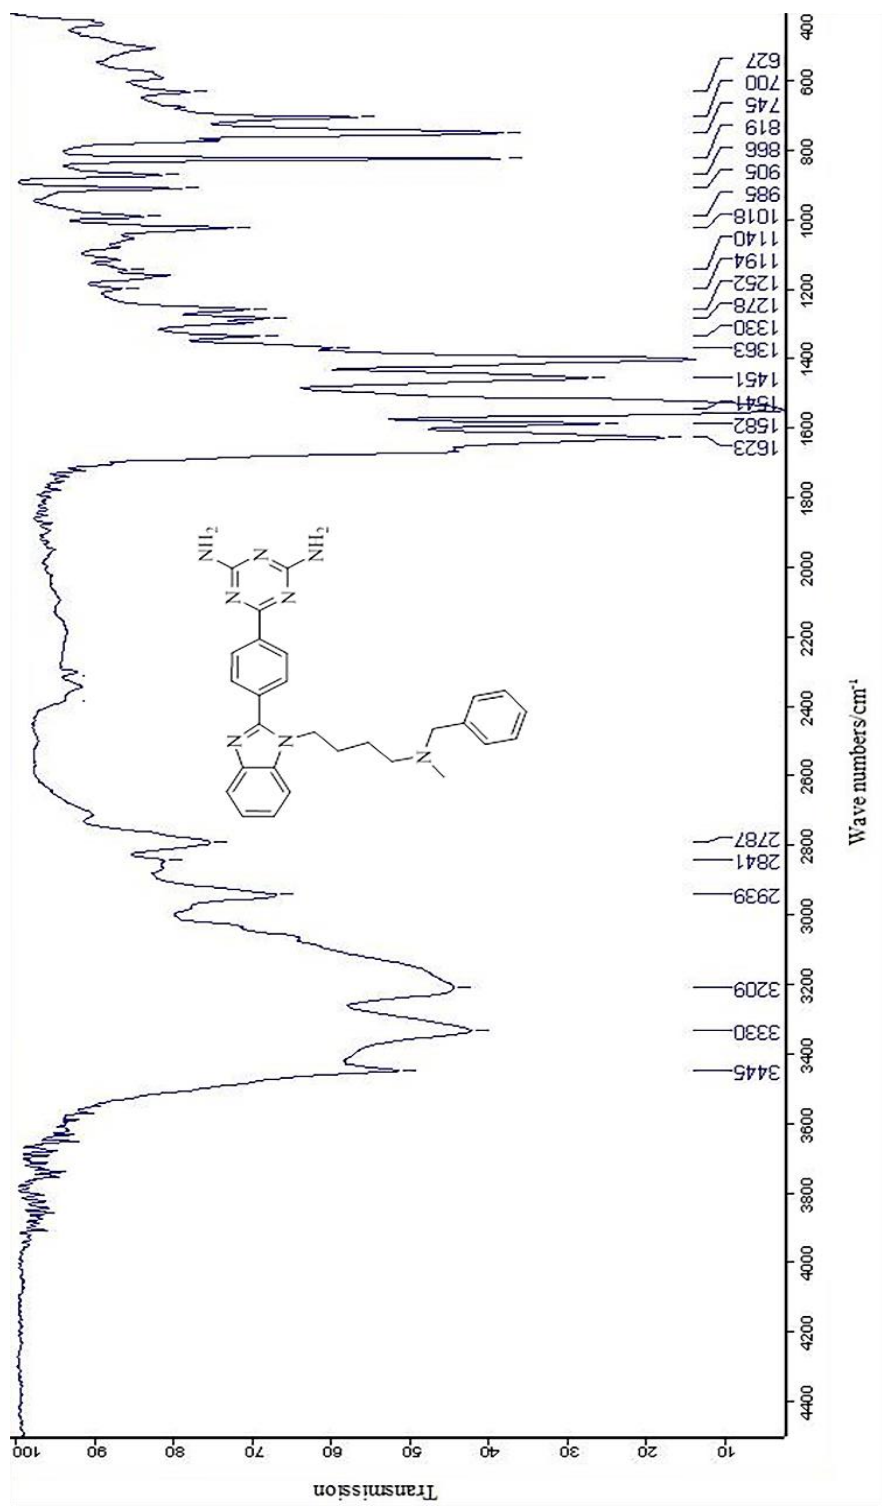

Figure 88. IR spectrum of compound (9k)

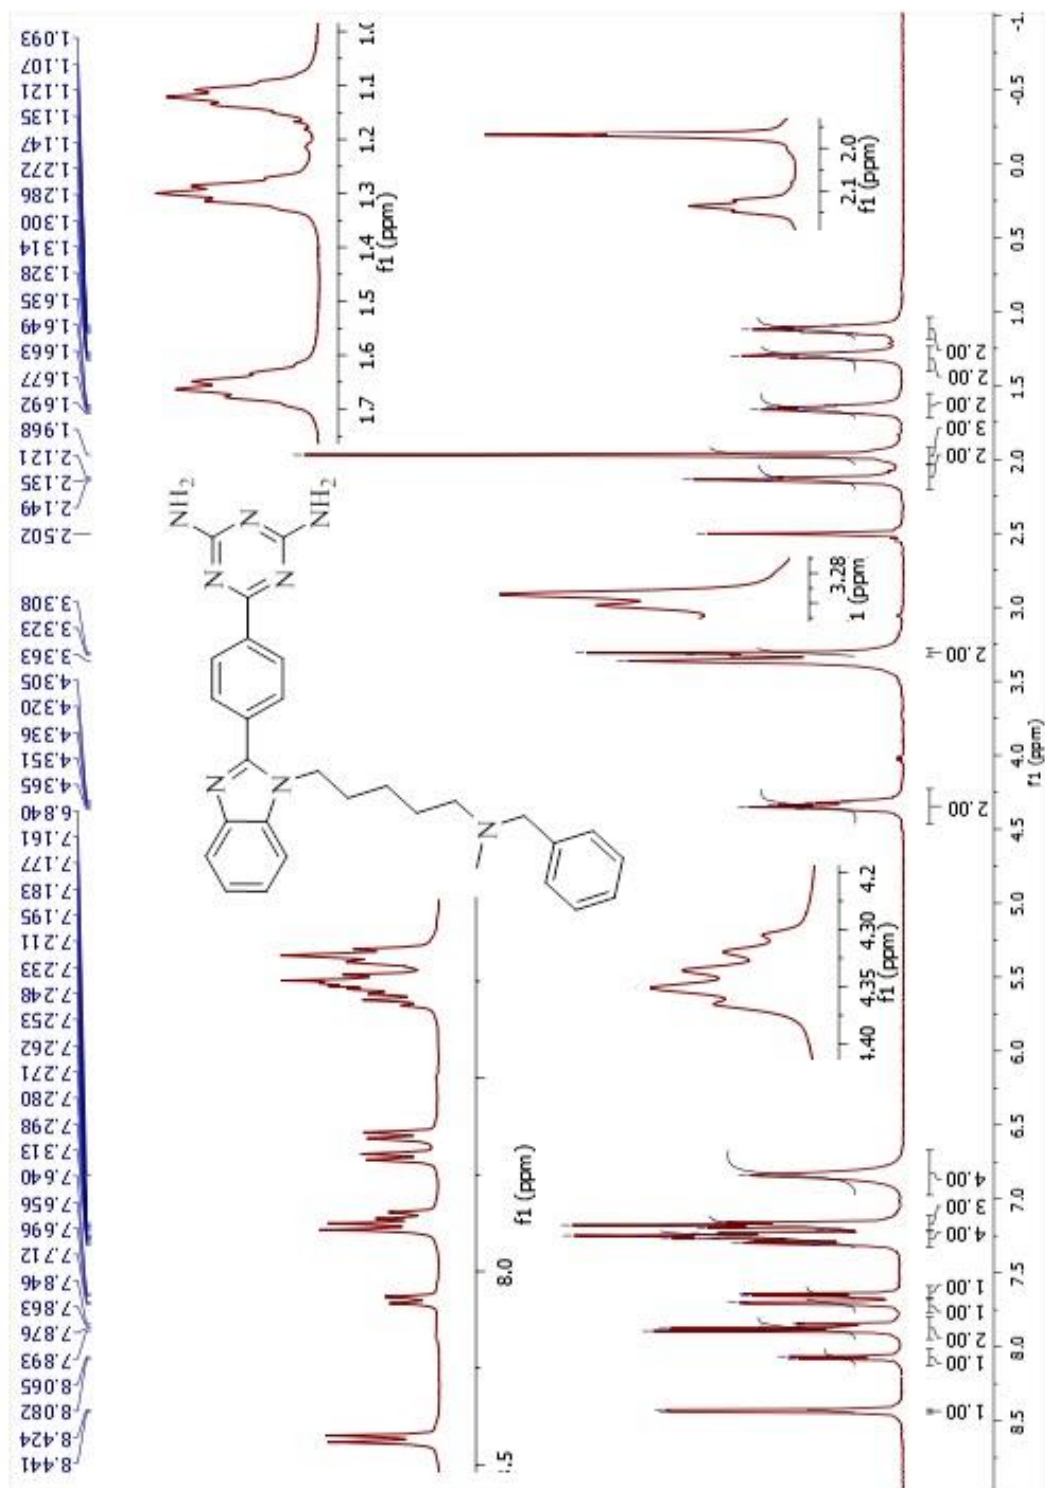

Figure 89. <sup>1</sup>H-NMR spectrum of compound (9l)

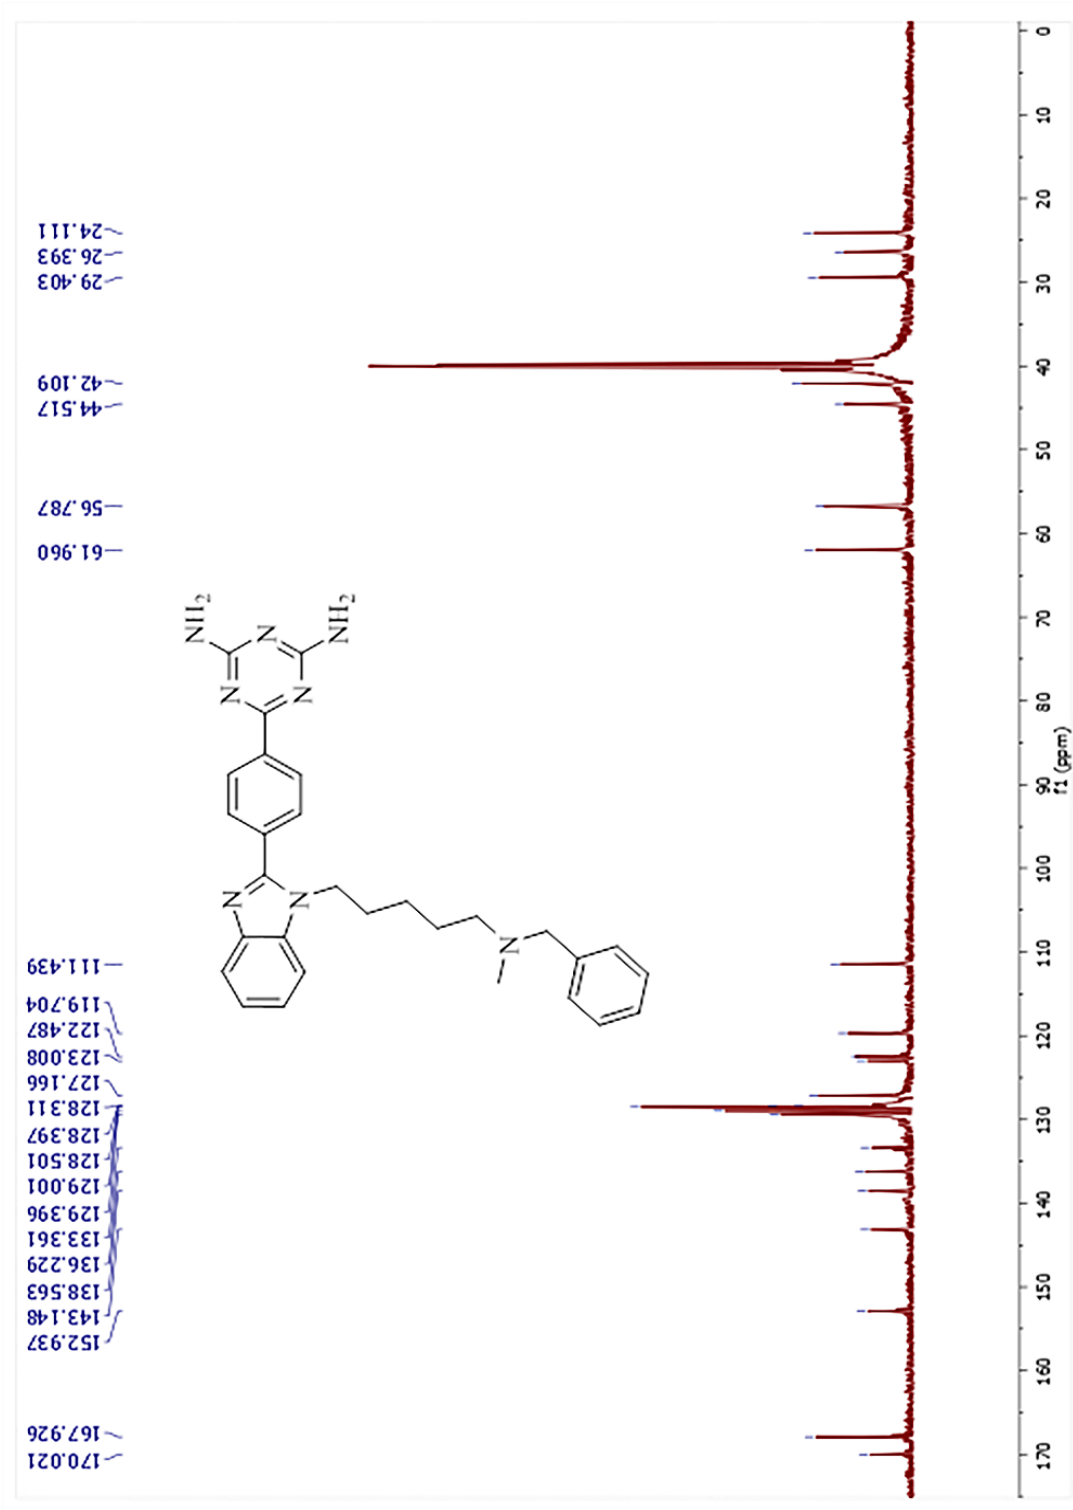

Figure 90. <sup>13</sup>C-NMR spectrum of compound (91)

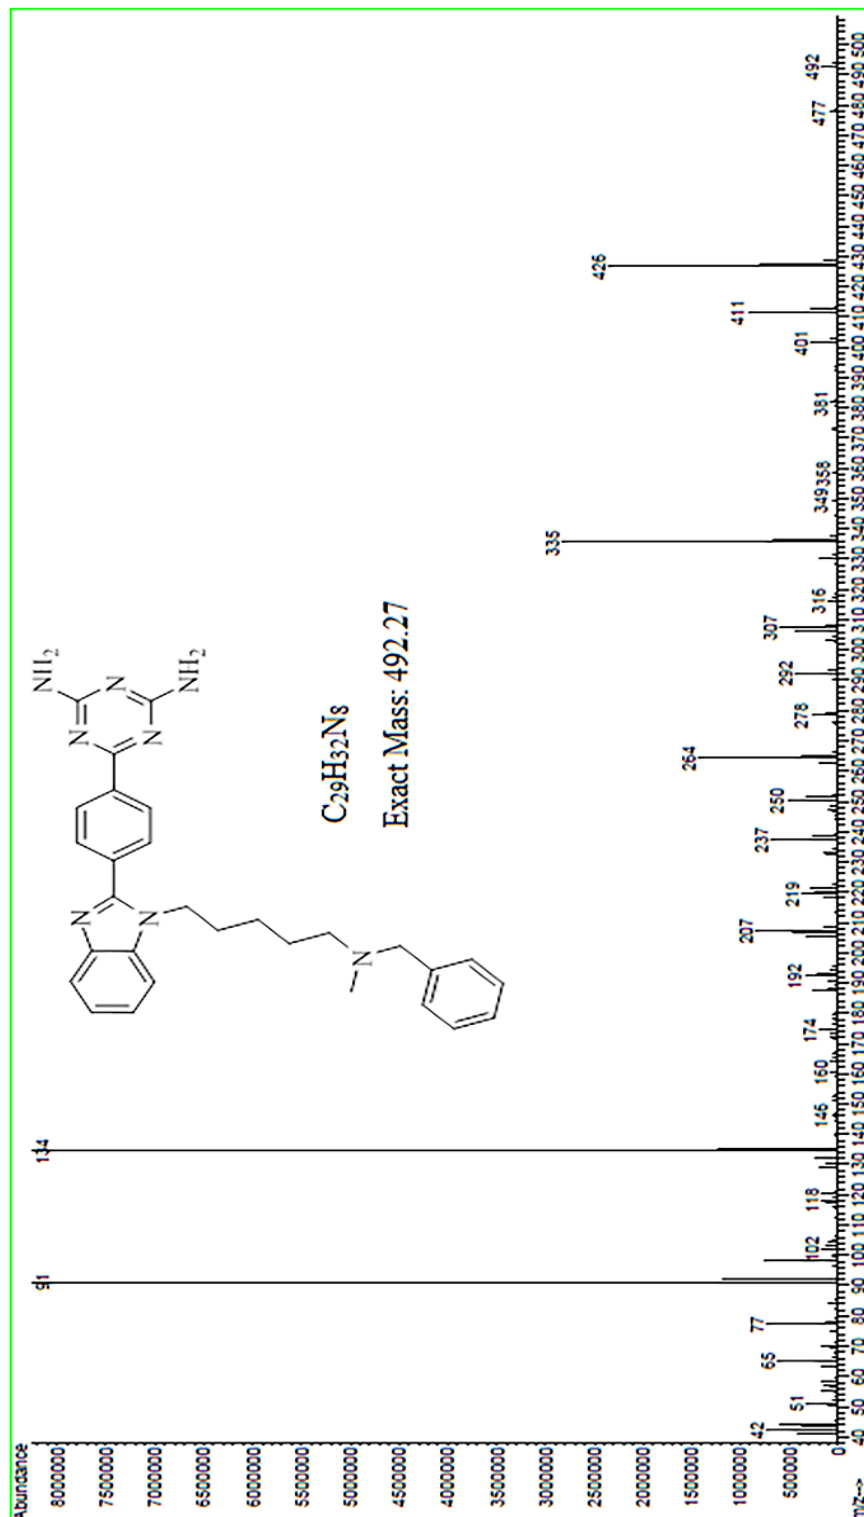

Figure 91. MASS spectrum of compound (91)



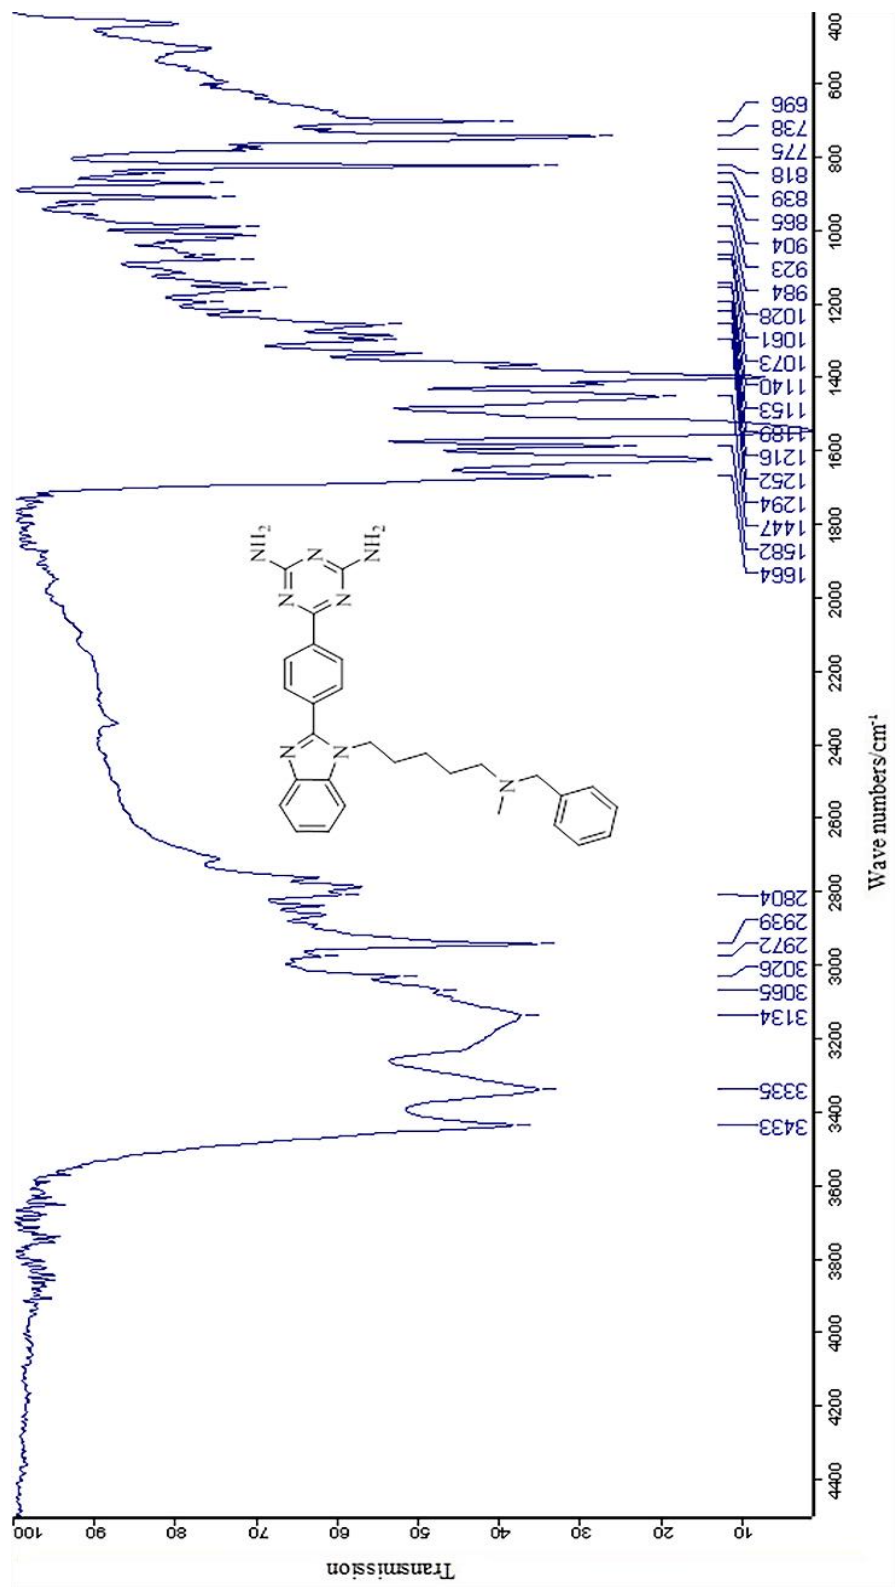

Figure 92. IR spectrum of compound (91)

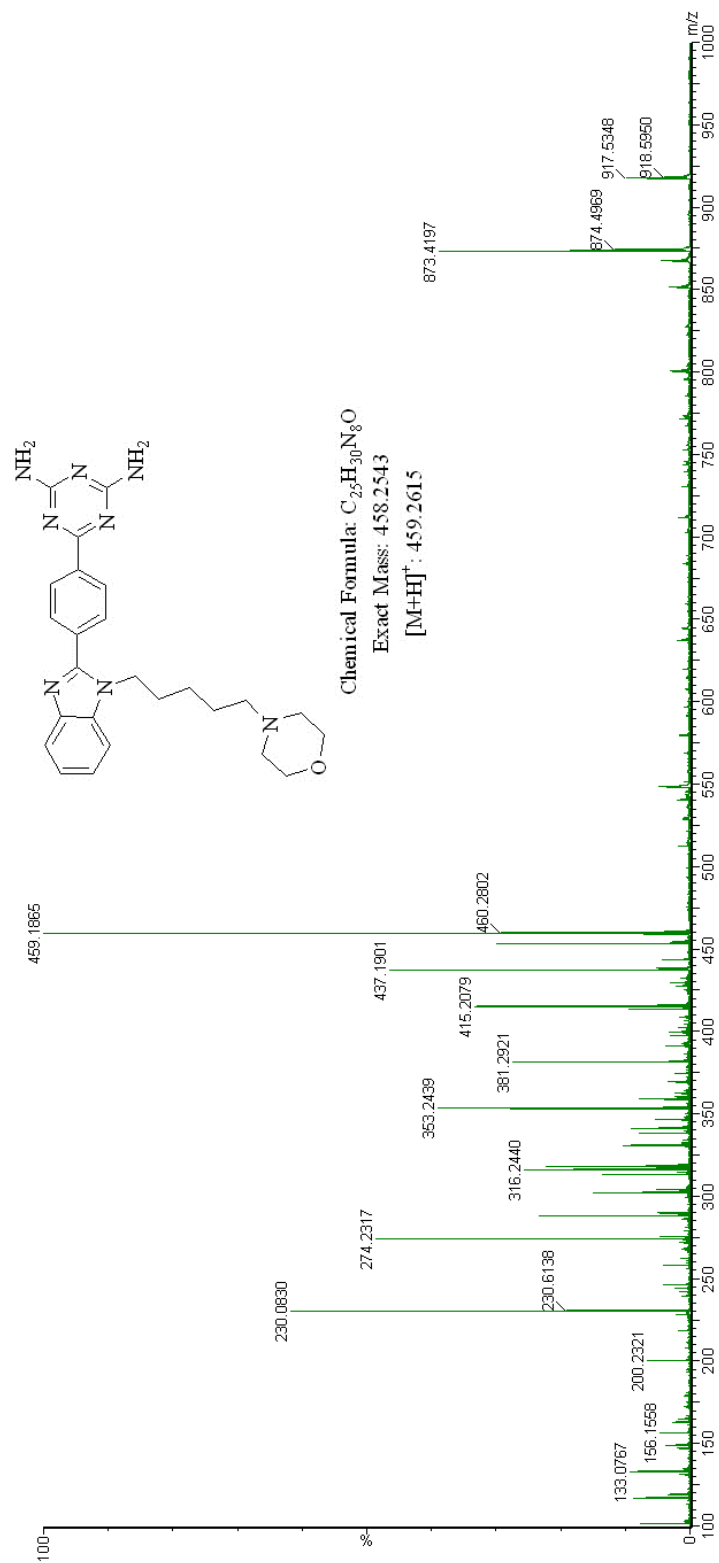

Figure 93. HRMS spectrum of compound (9i)

**Table 1S.** The predicted binding affinity of the selected ligands with the desired enzyme.

| Enzyme | PDB  | Compound | $\Delta G_b$<br>(kcal. mol <sup>-1</sup> ) | Interactions                      | Residues      | Distance Å |
|--------|------|----------|--------------------------------------------|-----------------------------------|---------------|------------|
| AChE   | 6O4W | 9c       | -9.33                                      | Hydrogen Bond                     | SER293        | 2.48       |
|        |      |          |                                            | Hydrogen Bond                     | ASP74         | 2.65       |
|        |      |          |                                            | Hydrophobic (Pi-Pi Stacked)       | TRP286        | 4.99       |
|        |      |          |                                            | Hydrophobic (Amide-Pi Stacked)    | GLY120:GLY121 | 3.48       |
|        |      |          |                                            | Hydrophobic (Pi-Alkyl)            | TRP86         | 4.91       |
|        |      |          |                                            | Hydrophobic (Pi-Alkyl)            | TYR341        | 5.08       |
|        |      |          |                                            | Hydrophobic (Pi-Alkyl)            | PHE338        | 4.10       |
| BuChE  | 4TPK | 9l       | -10.05                                     | Hydrogen Bond                     | HIS438        | 2.23       |
|        |      |          |                                            | Hydrogen Bond                     | GLU197        | 2.51       |
|        |      |          |                                            | Electrostatic (Pi-Anion)          | ASP70         | 4.61       |
|        |      |          |                                            | Hydrophobic (Pi-Pi Stacked)       | TRP82         | 5.30       |
|        |      |          |                                            | Hydrophobic (Pi-Pi Stacked)       | TRP82         | 3.85       |
|        |      |          |                                            | Hydrophobic (Pi-Pi Stacked)       | TRP82         | 3.53       |
|        |      |          |                                            | Hydrophobic (Pi-Pi T-shaped)      | TRP231        | 4.91       |
|        |      |          |                                            | Hydrophobic (Pi-Pi T-shaped)      | TRP231        | 4.80       |
|        |      |          |                                            | Hydrophobic (Pi-Pi T-shaped)      | PHE329        | 5.22       |
|        |      |          |                                            | Hydrophobic (Amide-Pi Stacked)    | ILE69:ASP70   | 4.08       |
|        |      |          |                                            | Hydrophobic (Amide-Pi Stacked)    | ILE69:ASP70   | 4.70       |
| BACE1  | 1W51 | 9a       | -9.60                                      | Hydrogen Bond                     | ASP228        | 2.11       |
|        |      |          |                                            | Hydrogen Bond                     | ASP32         | 2.59       |
|        |      |          |                                            | Hydrogen Bond                     | THR72         | 2.74       |
|        |      |          |                                            | Hydrogen Bond                     | GLY11         | 2.69       |
|        |      |          |                                            | Hydrophobic (Pi-Sigma)            | GLN73         | 2.65       |
|        |      |          |                                            | Electrostatic (Attractive Charge) | ASP32         | 4.79       |
|        |      |          |                                            | Electrostatic (Attractive Charge) | ASP228        | 4.64       |
|        |      |          |                                            | Hydrophobic (Pi-Alkyl)            | LEU30         | 4.39       |
|        |      |          |                                            | Hydrophobic (Pi-Alkyl)            | ILE110        | 4.84       |
|        |      |          |                                            | Hydrophobic (Pi-Alkyl)            | ILE118        | 5.426      |

**Table 2S.** Physicochemical properties and in silico ADME of the synthesized compounds.

| Entry               | M <sub>w</sub> <sup>a</sup><br>(g/mol) | log P <sup>b</sup> | HBD <sup>c</sup> | HBA <sup>d</sup> | TPSA<br>(Å <sup>2</sup> ) <sup>e</sup> | n-RB <sup>f</sup> | Absorption         |                                                               |                                                                | Distribution                                   |
|---------------------|----------------------------------------|--------------------|------------------|------------------|----------------------------------------|-------------------|--------------------|---------------------------------------------------------------|----------------------------------------------------------------|------------------------------------------------|
|                     |                                        |                    |                  |                  |                                        |                   | % HIA <sup>g</sup> | In vitro caco-2 cell<br>permeability (nm<br>s <sup>-1</sup> ) | In vitro skin<br>permeability (log Kp,<br>cm h <sup>-1</sup> ) | % <i>In vitro</i><br>plasma<br>Protein bonding |
| <b>9a</b>           | 518.6                                  | 3.81               | 2                | 5                | 111.77                                 | 8                 | 96.37              | 21.36                                                         | -2.18                                                          | 85.61                                          |
| <b>9b</b>           | 532.64                                 | 4.00               | 2                | 5                | 111.77                                 | 9                 | 96.44              | 21.22                                                         | -2.06                                                          | 86.44                                          |
| <b>9c</b>           | 546.7                                  | 4.19               | 2                | 5                | 111.77                                 | 10                | 96.53              | 22.5                                                          | -1.98                                                          | 86.16                                          |
| <b>9d</b>           | 428.5                                  | 2.63               | 2                | 5                | 111.77                                 | 6                 | 96.51              | 20.13                                                         | -3.17                                                          | 77.48                                          |
| <b>9e</b>           | 442.5                                  | 2.84               | 2                | 5                | 111.77                                 | 7                 | 96.43              | 19.29                                                         | -2.97                                                          | 81.54                                          |
| <b>9f</b>           | 456.6                                  | 3.04               | 2                | 5                | 111.77                                 | 8                 | 96.35              | 20.64                                                         | -2.81                                                          | 85.20                                          |
| <b>9g</b>           | 430.5                                  | 1.64               | 2                | 6                | 121.00                                 | 6                 | 97.03              | 18.67                                                         | -3.76                                                          | 50.81                                          |
| <b>9h</b>           | 444.5                                  | 1.65               | 2                | 6                | 121.00                                 | 7                 | 97.04              | 20.88                                                         | -3.56                                                          | 65.06                                          |
| <b>9i</b>           | 458.5                                  | 2.06               | 2                | 6                | 121.00                                 | 8                 | 97.01              | 19.79                                                         | -3.4                                                           | 75.35                                          |
| <b>9j</b>           | 464.5                                  | 3.04               | 2                | 5                | 111.77                                 | 8                 | 96.16              | 20.49                                                         | -2.30                                                          | 86.98                                          |
| <b>9k</b>           | 478.6                                  | 3.23               | 2                | 5                | 111.77                                 | 9                 | 96.18              | 19.64                                                         | -2.16                                                          | 87.15                                          |
| <b>9l</b>           | 492.6                                  | 3.43               | 2                | 5                | 111.77                                 | 10                | 96.21              | 21.31                                                         | -2.06                                                          | 86.67                                          |
| Rule of<br>Lipinski | ≤ 500                                  | ≤ 5                | ≤ 5              | ≤ 10             | ≤ 140                                  | ≤ 10              | -                  | -                                                             | -                                                              | -                                              |

<sup>a</sup> Molecular weight (MW). <sup>b</sup> Logarithm of the partition coefficient between n-octanol and water (log P). <sup>c</sup> Number of hydrogen bond donors (HBD). <sup>d</sup> Number of hydrogen bond acceptors (HBA). <sup>e</sup> Topological polar surface area (TPSA). <sup>f</sup> Number of rotatable bonds (n-RB). <sup>g</sup> Human intestinal absorption
